# Supplementary material
Source: publisher site journal article supplement (https://www.dovepress.com/article/422363)
Supplement: Supplementary file 1 [file get_supplementary_file.php]

Supplementary Table S1: Differential metabolites between LTBI and HC

| Name | Formula | Molecular Weight | RT [min] | m/z | FC | Pvalue | VIP | Trend (based on HC) |
| --- | --- | --- | --- | --- | --- | --- | --- | --- |
| N-(4-chlorophenyl)-N'-cyclohexylthiourea | C13 H17 Cl N2 S | 268.08103 | 4.444 | 267.07382 | 0.068437012 | 1.53E-07 | 2.7309896 | ↓ |
| 5-Methoxyuridine | C10 H14 N2 O7 | 236.12546 | 3.967 | 273.07364 | 0.386508242 | 7.03E-07 | 2.432880928 | ↓ |
| N-Acetyl-Asp-Glu | C11 H16 N2 O8 | 304.09089 | 3.989 | 303.08359 | 0.299725831 | 9.94E-07 | 2.391320084 | ↓ |
| Hypoxanthine | C5 H4 N4 O | 136.03882 | 1.934 | 135.03149 | 0.450112717 | 2.34E-06 | 2.061010499 | ↓ |
| Gly-Tyr | C11 H14 N2 O4 | 238.09569 | 3.949 | 237.08849 | 0.499403988 | 3.62E-06 | 2.374747747 | ↓ |
| 5-Methyluridine | C10 H15 N3 O5 | 258.08551 | 4.028 | 257.07819 | 0.355708995 | 4.79E-06 | 2.305685047 | ↓ |
| Xanthosine | C10 H12 N4 O6 | 284.0759 | 3.549 | 283.06854 | 0.201302878 | 6.78E-06 | 2.217831391 | ↓ |
| N-(4-chlorophenethyl)-1-adamantanecarboxamide | C19 H24 Cl N O | 317.15898 | 4.762 | 316.15176 | 0.550768213 | 9.20E-06 | 2.212112946 | ↓ |
| 2,6-Dihydroxypurine | C5 H4 N4 O2 | 152.03375 | 4.713 | 151.02647 | 0.282267775 | 2.51E-05 | 2.146546023 | ↓ |
| Phe-Pro | C14 H18 N2 O3 | 262.13214 | 5.409 | 261.12488 | 0.522312435 | 4.49E-05 | 2.172018279 | ↓ |
| Gly-Leu | C8 H16 N2 O3 | 188.11655 | 5.039 | 187.10924 | 0.498471854 | 6.42E-05 | 2.193551678 | ↓ |
| Methionine | C5 H11 N O2 S | 149.05137 | 1.905 | 148.04414 | 0.519056013 | 0.000144963 | 2.074421396 | ↓ |
| Xanthine | C5 H4 N4 O2 | 152.03367 | 1.878 | 151.02638 | 0.290471553 | 0.000145165 | 1.885522871 | ↓ |
| Galactonic acid | C6 H12 O7 | 196.05852 | 1.36 | 195.05119 | 0.123178939 | 0.00015745 | 2.45523769 | ↓ |
| 9-(3-O-Methylpentofuranosyl)-1,9-dihydro-6H-purin-6-one | C11 H14 N4 O5 | 282.09684 | 4.918 | 281.0896 | 0.391405701 | 0.000165715 | 1.87294097 | ↓ |
| Gly-Val | C7 H14 N2 O3 | 174.1008 | 2.835 | 173.09351 | 0.57220441 | 0.000194572 | 2.12839571 | ↓ |
| Inosine | C10 H12 N4 O5 | 268.08089 | 3.143 | 267.07358 | 0.436431052 | 0.000382751 | 1.911676973 | ↓ |
| Orotic acid | C5 H4 N2 O4 | 156.01745 | 1.541 | 155.01015 | 0.468730983 | 0.000438774 | 2.087513468 | ↓ |
| (5-L-Glutamyl)-L-Amino Acid | C8 H14 N2 O5 | 218.09053 | 1.441 | 217.08328 | 0.553369738 | 0.000476513 | 1.763631468 | ↓ |
| Bilirubin | C33 H36 N4 O6 | 584.26392 | 10.654 | 583.25647 | 2.288614236 | 0.000487871 | 1.960501573 | ↑ |
| N'1-(2-chlorobenzoyl)-2-[(2-methyl-1H-indol-3-yl)thio]ethanohydrazide | C18 H16 Cl N3 O2 S | 373.06987 | 4.291 | 372.06259 | 0.370430152 | 0.000529261 | 2.034306112 | ↓ |
| D-Mannitol 1-phosphate | C6 H15 O9 P | 262.04555 | 1.412 | 261.03793 | 0.572009493 | 0.000564087 | 2.07717895 | ↓ |
| Oxaloacetate | C4 H4 O5 | 132.00629 | 1.531 | 130.99904 | 0.625206693 | 0.000579144 | 1.737937788 | ↓ |
| Octanoyl-coenzyme A | C29 H50 N7 O17 P3 S | 893.21374 | 4.856 | 892.20581 | 0.311502305 | 0.000647098 | 1.999740737 | ↓ |
| 7-(1-pyrrolidinyl)pyrimido[4,5-d]pyrimidin-4-amine | C10 H12 N6 | 216.11115 | 2.256 | 215.10381 | 0.651033128 | 0.000726212 | 1.570030776 | ↓ |
| Prolylglycine | C7 H12 N2 O3 | 172.0852 | 1.566 | 171.07793 | 0.661534344 | 0.000751231 | 1.845414714 | ↓ |
| Uracil 1-beta-D-arabinofuranoside | C9 H12 N2 O6 | 244.06984 | 1.472 | 243.06262 | 0.524196549 | 0.000808139 | 1.848937614 | ↓ |
| ethyl 3-cyano-2-hydroxy-6-phenylisonicotinate | C15 H12 N2 O3 | 268.08051 | 5.021 | 267.07388 | 0.376007257 | 0.001251664 | 1.756989217 | ↓ |
| 1,2,3-Benzenetricarboxylic acid | C9 H6 O6 | 210.01699 | 5.254 | 209.00954 | 0.467034768 | 0.001784381 | 1.730571679 | ↓ |
| Guanosine | C10 H13 N5 O5 | 283.09173 | 2.425 | 282.08435 | 0.337885505 | 0.002058247 | 1.730242328 | ↓ |
| N-acetyl-L-ornithine | C7 H14 N2 O3 | 174.1009 | 2.001 | 173.09363 | 0.657097324 | 0.002317319 | 1.466643182 | ↓ |
| 4-Coumaric acid | C9 H8 O3 | 164.04755 | 5.572 | 163.04041 | 0.442722386 | 0.002478253 | 1.755615515 | ↓ |
| Docosahexaenoyl Ethanolamide | C24 H37 N O2 | 417.29216 | 8.509 | 416.28488 | 0.478159015 | 0.002756423 | 1.479452732 | ↓ |
| L-(-)-Malic acid | C4 H6 O5 | 134.02186 | 1.503 | 133.01457 | 0.49065732 | 0.002822403 | 1.554878847 | ↓ |
| N'1-[1-(2-hydroxyphenyl)ethylidene]-3-methoxybenzene-1-carbohydrazide | C16 H16 N2 O3 | 284.11751 | 10.8 | 283.1102 | 1.624035078 | 0.002962248 | 1.790006088 | ↑ |
| Uridine | C9 H12 N2 O6 | 244.06975 | 2.055 | 243.06245 | 0.553852099 | 0.003300411 | 1.481818981 | ↓ |
| Mag (18:1) | C21 H40 O4 | 356.29252 | 7.735 | 355.28525 | 0.555272518 | 0.003337879 | 1.520747459 | ↓ |
| Deoxycholic Acid | C24 H40 O4 | 392.29263 | 7.225 | 391.28543 | 0.579508162 | 0.003382033 | 1.404111477 | ↓ |
| Deoxyguanosine | C10 H13 N5 O4 | 267.097 | 3.845 | 266.08972 | 0.468007878 | 0.003399974 | 1.551160033 | ↓ |
| DL-Malic acid | C4 H6 O5 | 134.02183 | 1.646 | 133.01454 | 0.528079103 | 0.003592772 | 1.571442728 | ↓ |
| Flavin mononucleotide (FMN) | C17 H21 N4 O9 P | 456.10658 | 4.891 | 455.09937 | 0.661421449 | 0.004027508 | 1.349374538 | ↓ |
| 2-(2-pyridyl)-2-{2-[4-(trifluoromethoxy)phenyl]hydrazono}acetonitrile | C14 H9 F3 N4 O | 306.07405 | 4.867 | 305.06677 | 0.601421819 | 0.004137107 | 1.442171486 | ↓ |
| 2-[6-(1H-benzo[d]imidazol-2-yl)-2-pyridyl]-1H-benzo[d]imidazole | C19 H13 N5 | 312.12454 | 5.901 | 311.11642 | 0.441256397 | 0.00417811 | 1.576733615 | ↓ |
| Asp-Phe methyl ester | C14 H18 N2 O5 | 294.12206 | 4.951 | 293.11469 | 0.128601526 | 0.005147926 | 1.52431337 | ↓ |
| 2'-Deoxyinosine | C10 H12 N4 O4 | 252.08609 | 3.856 | 251.07875 | 0.299114734 | 0.005279582 | 1.408969224 | ↓ |
| 3-Hydroxysebacic acid | C10 H18 O5 | 218.11577 | 3.156 | 217.10849 | 0.057788816 | 0.005936897 | 1.763176072 | ↓ |
| 10-Hydroxydecanoic acid | C10 H20 O3 | 188.14161 | 6.161 | 187.13429 | 0.408335186 | 0.006042691 | 1.543216622 | ↓ |
| 2,6-dimethoxy-N-(1-methyl-1H-pyrazol-5-yl)benzamide | C13 H15 N3 O3 | 261.1119 | 5.239 | 260.10458 | 0.657280679 | 0.006453888 | 1.250853102 | ↓ |
| Pyridoxal 5-phosphate monohydrate | C8 H12 N O7 P | 265.03544 | 2.341 | 264.02814 | 0.642201449 | 0.006657703 | 1.567288088 | ↓ |
| 6,7-Dihydroxycoumarin | C9 H6 O4 | 178.02701 | 5.376 | 177.01982 | 0.478865651 | 0.00689714 | 1.343362171 | ↓ |
| dUMP | C9 H13 N2 O8 P | 308.0419 | 1.526 | 307.0351 | 0.596589739 | 0.007219732 | 1.54557291 | ↓ |
| 3-(3-nitrophenyl)-2-phenylacrylic acid | C15 H11 N O4 | 290.04655 | 5.294 | 289.03925 | 5.855956502 | 0.007469786 | 1.936702687 | ↑ |
| Ala-Leu | C9 H18 N2 O3 | 202.13233 | 5.289 | 201.12511 | 0.610003842 | 0.007594765 | 1.251633107 | ↓ |
| 4-Toluic acid | C8 H8 O2 | 136.05274 | 5.623 | 135.04547 | 0.486682327 | 0.008335658 | 1.546536649 | ↓ |
| acetoacetate | C4 H6 O3 | 102.03192 | 5.187 | 101.02464 | 0.597476654 | 0.008383614 | 1.604676155 | ↓ |
| Pantetheine | C11 H22 N2 O4 S | 278.13025 | 5.89 | 277.12305 | 3.083569285 | 0.008400241 | 1.717146911 | ↑ |
| Traumatic acid | C12 H20 O4 | 228.13652 | 5.839 | 227.12924 | 0.436146196 | 0.00867997 | 1.794541983 | ↓ |
| 13,14-dihydro-15-keto-tetranor Prostaglandin D2 | C16 H26 O5 | 280.16771 | 6.094 | 279.16034 | 0.245267092 | 0.009030133 | 1.599546887 | ↓ |
| 5-Fluorouridine | C9 H11 F N2 O6 | 131.03046 | 1.471 | 130.02306 | 0.567902516 | 0.009080998 | 2.109679313 | ↓ |
| Thymidine 5'-diphosphate | C10 H16 N2 O11 P2 | 402.02366 | 2.1 | 401.01639 | 0.655769183 | 0.009246781 | 1.520428126 | ↓ |
| Asp-Glu | C9 H14 N2 O7 | 262.0804 | 1.45 | 261.07315 | 0.547900111 | 0.009421466 | 1.274142666 | ↓ |
| FAHFA (2:0/16:0) | C18 H34 O4 | 314.24591 | 10.212 | 313.23871 | 0.499022144 | 0.010108997 | 1.540274958 | ↓ |
| 3,5-Dimethoxybenzoic acid | C9 H10 O4 | 182.05838 | 4.112 | 181.0511 | 0.570675129 | 0.010732116 | 1.579188211 | ↓ |
| 2,3-Dinor-TXB2 | C18 H30 O6 | 342.20369 | 5.449 | 341.19705 | 0.600720942 | 0.01077997 | 1.467833784 | ↓ |
| 2-Methylpentanedioic acid | C6 H10 O4 | 146.05835 | 5.848 | 145.05121 | 0.42544126 | 0.011252397 | 1.707636599 | ↓ |
| Uridine 5'-diphosphate (UDP) | C9 H14 N2 O12 P2 | 404.0023 | 1.552 | 402.99506 | 0.627316016 | 0.011438304 | 1.24343218 | ↓ |
| 1-(4-methylphenyl)-3-(2-pyridylthio)pyrrolidine-2,5-dione | C16 H14 N2 O2 S | 299.07736 | 3.951 | 298.06998 | 0.498388974 | 0.011553601 | 1.374420677 | ↓ |
| D-(-)-Ribose | C5 H10 O5 | 150.05309 | 1.446 | 149.04591 | 0.342179127 | 0.011940435 | 1.809920583 | ↓ |
| N-(2,5-dichlorobenzyl)-5-ethyl-1H-indole-2-carboxamide | C18 H16 Cl2 N2 O | 346.06952 | 6.027 | 345.06213 | 0.562290422 | 0.012113944 | 1.313057818 | ↓ |
| Threonine | C4 H9 N O3 | 119.05858 | 1.336 | 118.05125 | 0.635646779 | 0.012393761 | 1.452696501 | ↓ |
| o-Cresol | C7 H8 O | 108.0578 | 5.472 | 107.0504 | 0.50125851 | 0.012400457 | 1.490244409 | ↓ |
| D-Pantethine | C22 H42 N4 O8 S2 | 554.24501 | 5.514 | 553.23773 | 2.967336218 | 0.012522232 | 1.60008049 | ↑ |
| 1-(2,4-dihydroxyphenyl)-2-(3,5-dimethoxyphenyl)propan-1-one | C17 H18 O5 | 302.11703 | 5.655 | 301.10941 | 0.177683726 | 0.01292179 | 1.475504832 | ↓ |
| Tetradecanedioic acid | C14 H26 O4 | 258.18345 | 6.922 | 257.17615 | 0.559082057 | 0.01371505 | 1.157388004 | ↓ |
| Lithocholic Acid | C24 H40 O3 | 376.29781 | 8.859 | 375.29071 | 0.662867031 | 0.013972507 | 1.143806481 | ↓ |
| Isophorone | C9 H14 O | 138.10457 | 6.484 | 137.09755 | 0.39542962 | 0.014658805 | 1.54241119 | ↓ |
| 4-(hydroxymethyl)benzoic acid | C8 H8 O3 | 152.04773 | 5.557 | 151.04044 | 0.508437003 | 0.014746757 | 1.332794907 | ↓ |
| 2-(2-carboxy-2-methylpropyl)-4,6-dimethylbenzoic acid | C14 H18 O4 | 250.12093 | 5.936 | 249.11359 | 0.336678175 | 0.014950206 | 1.495219954 | ↓ |
| L-Serine | C3 H7 N O3 | 105.04293 | 1.306 | 104.03562 | 0.656680162 | 0.014973638 | 1.480015928 | ↓ |
| J147 | C18 H17 F3 N2 O2 | 350.12309 | 5.066 | 349.116 | 0.251472024 | 0.015156198 | 1.46809196 | ↓ |
| N'1-phenylpropanohydrazide | C9 H12 N2 O | 164.09538 | 5.532 | 163.08812 | 0.570184582 | 0.015898972 | 1.336569318 | ↓ |
| trans-10-Heptadecenoic Acid | C17 H32 O2 | 268.24052 | 10.215 | 267.23322 | 0.583531726 | 0.016806453 | 1.510573289 | ↓ |
| Ethylmalonic acid | C5 H8 O4 | 132.04483 | 5.045 | 131.03755 | 0.305877309 | 0.017014068 | 1.253327591 | ↓ |
| 6-Hydroxymelatonin | C13 H16 N2 O3 | 248.1167 | 5.885 | 247.10898 | 0.402601951 | 0.017680489 | 1.349378136 | ↓ |
| Adenylosuccinic acid | C14 H18 N5 O11 P | 463.07246 | 4.679 | 462.06519 | 0.196005995 | 0.019027576 | 1.45708048 | ↓ |
| H-Gly-Pro-OH | C7 H12 N2 O3 | 172.08529 | 1.329 | 171.07808 | 0.462014197 | 0.020622722 | 1.318361133 | ↓ |
| LPE 20:0 | C25 H52 N O7 P | 509.34825 | 10.9 | 508.34097 | 2.139082473 | 0.020784899 | 1.380844872 | ↑ |
| isonicotinaldehyde 4-(5-methyl-2,4-dinitrophenyl)hydrazone | C13 H11 N5 O4 | 301.08006 | 3.626 | 300.07278 | 0.321321738 | 0.021345678 | 1.41011123 | ↓ |
| 5-Dehydroquinic acid | C7 H10 O6 | 190.04824 | 5.006 | 189.04085 | 0.587989318 | 0.021458837 | 1.515281373 | ↓ |
| Xanthorhamnin | C34 H42 O20 | 770.21626 | 5.006 | 769.20898 | 0.334444472 | 0.021470389 | 1.460774518 | ↓ |
| 3-[3-(beta-D-Glucopyranosyloxy)-2-hydroxyphenyl]propanoic acid | C15 H20 O9 | 344.11134 | 5.509 | 343.10403 | 0.266711786 | 0.021781721 | 1.577606882 | ↓ |
| Stercobilin | C33 H46 N4 O6 | 594.33321 | 5.532 | 593.32635 | 0.405850337 | 0.021906091 | 1.589997098 | ↓ |
| (R)-3-Hydroxy myristic acid | C14 H28 O3 | 244.20411 | 8.237 | 243.19679 | 0.627592158 | 0.022081811 | 1.063425587 | ↓ |
| 4-Hydroxy-2-Oxoglutaric Acid | C5 H6 O6 | 162.01686 | 1.53 | 161.00963 | 0.626601335 | 0.023027157 | 1.068704305 | ↓ |
| Adrenic acid | C22 H36 O2 | 332.27183 | 10.531 | 331.26459 | 2.976871321 | 0.023331806 | 1.334299809 | ↑ |
| Protectin D1 | C22 H32 O4 | 396.209 | 7.401 | 395.20172 | 0.423611939 | 0.024845091 | 1.321000422 | ↓ |
| LPE 19:1 | C24 H48 N O7 P | 493.31711 | 9.987 | 492.30981 | 1.744340236 | 0.025076648 | 1.647188088 | ↑ |
| LPE 20:3 | C25 H46 N O7 P | 503.30123 | 9.258 | 502.29367 | 1.692238335 | 0.025740046 | 1.614852852 | ↑ |
| 5-chloro-N-(4-morpholinophenyl)-1H-indole-2-carboxamide | C19 H18 Cl N3 O2 | 355.11343 | 4.871 | 354.10626 | 2.384437273 | 0.027446697 | 1.022644932 | ↑ |
| 2-(4-methoxyphenyl)-3-(2-phenyl-1H-imidazol-4-yl)acrylonitrile | C19 H15 N3 O | 301.11783 | 5.022 | 300.11057 | 0.634855515 | 0.027884995 | 1.210261159 | ↓ |
| Suberic acid | C8 H14 O4 | 174.08951 | 5.671 | 173.08215 | 0.66146582 | 0.027947878 | 1.495602441 | ↓ |
| Galacturonic acid | C6 H10 O7 | 194.04297 | 1.38 | 193.03569 | 0.643962722 | 0.030402325 | 1.80035409 | ↓ |
| 5-Hydroxylysine | C6 H14 N2 O3 | 162.10073 | 1.172 | 161.09351 | 2.918251841 | 0.030989763 | 1.219707296 | ↑ |
| 3-[(methoxycarbonyl)amino]-2,2,3-trimethylbutanoic acid | C9 H17 N O4 | 203.11617 | 5.708 | 202.10889 | 0.422149894 | 0.032597493 | 1.48067301 | ↓ |
| L-Histidinol | C6 H11 N3 O | 141.09058 | 1.474 | 140.08328 | 0.578614959 | 0.032641259 | 1.215846398 | ↓ |
| 7-Ketolithocholic acid | C24 H38 O4 | 390.27705 | 7.119 | 389.26968 | 1.682137811 | 0.033091861 | 1.42085408 | ↑ |
| 11(Z),14(Z)-Eicosadienoic Acid | C20 H36 O2 | 308.27178 | 10.773 | 307.26456 | 2.424873357 | 0.034174143 | 1.313284681 | ↑ |
| N1-(3-amino-4-chlorophenyl)-2-[2,4-di(tert-pentyl)phenoxy]acetamide | C24 H33 Cl N2 O2 | 416.22345 | 8.408 | 415.21606 | 1.746105159 | 0.035043462 | 1.375179328 | ↑ |
| FAHFA (18:1/20:3) | C38 H66 O4 | 586.49417 | 10.513 | 585.48657 | 2.772303959 | 0.035831353 | 1.543677439 | ↑ |
| 6-Phosphogluconic acid | C6 H13 O10 P | 276.02473 | 1.518 | 275.01746 | 0.521576769 | 0.036065627 | 1.270300366 | ↓ |
| LysoPC 20:2 | C28 H54 N O7 P | 547.36308 | 7.629 | 1139.72437 | 0.124370908 | 0.03633164 | 1.331991222 | ↓ |
| mephedrone-d3 | C11 H12 [2]H3 N O | 179.95662 | 1.218 | 178.94937 | 1.606968638 | 0.040068644 | 1.368293908 | ↑ |
| 2-Hydroxy-1-(4-methoxyphenyl)propyl hexopyranoside | C16 H24 O8 | 344.14765 | 5.71 | 343.14008 | 0.50561975 | 0.040162122 | 1.198123498 | ↓ |
| Allolithocholic acid | C24 H40 O3 | 376.29854 | 7.423 | 375.29117 | 2.833536622 | 0.040437952 | 1.230374166 | ↑ |
| N1-[3-(1H-imidazol-1-yl)propyl]-2-[(4-nitrobenzoyl)amino]benzamide | C20 H19 N5 O4 | 393.1461 | 5.871 | 392.13898 | 0.555051965 | 0.040700272 | 1.29554518 | ↓ |
| N-[3-(aminosulfonyl)phenyl]-2,3-dihydro-1,4-benzodioxine-2-carboxamide | C15 H14 N2 O5 S | 334.06952 | 5.224 | 333.06256 | 0.359351455 | 0.043133287 | 1.176273167 | ↓ |
| Glycodeoxycholic Acid (hydrate) | C26 H43 N O5 | 449.31454 | 7.454 | 448.30722 | 0.535584878 | 0.043800703 | 1.250533657 | ↓ |
| Diethyloxalpropionate | C9 H14 O5 | 202.08458 | 5.398 | 201.07736 | 0.299504733 | 0.043853011 | 1.236377066 | ↓ |
| L-Methionine sulfone | C5 H11 N O4 S | 181.0413 | 1.583 | 180.03407 | 0.036625242 | 0.044291423 | 1.208177135 | ↓ |
| LysoPC 12:1 | C20 H36 N O7 P | 433.22111 | 6.047 | 432.21384 | 0.503914544 | 0.044452406 | 1.207520566 | ↓ |
| Formononetin | C16 H12 O4 | 268.07381 | 6.263 | 267.0665 | 0.330429966 | 0.044676984 | 1.367893168 | ↓ |
| 2-Methoxyestrone | C19 H24 O3 | 300.17287 | 6.309 | 299.16559 | 0.215697705 | 0.046089194 | 1.226087805 | ↓ |
| 2-Propylglutaric acid | C8 H14 O4 | 174.0895 | 5.896 | 173.08229 | 0.609896659 | 0.047153775 | 1.136302816 | ↓ |
| 3-methyl-2-[(phenylsulfonyl)amino]butanoic acid | C11 H15 N O4 S | 257.07244 | 5.869 | 256.06519 | 0.332869105 | 0.048104893 | 1.146130713 | ↓ |
| Estrone | C18 H22 O2 | 316.16786 | 5.89 | 315.16049 | 0.448357664 | 0.048165661 | 1.276714174 | ↓ |
| LPC 18:0 | C26 H54 N O7 P | 569.36977 | 10.187 | 568.36279 | 3.248100506 | 0.048346583 | 1.195144757 | ↑ |
| 1,3,5-Trimethylpyrazole | C6 H10 N2 | 110.08456 | 4.885 | 109.07735 | 0.403489282 | 0.048738291 | 1.103635377 | ↓ |
| Dodecanedioic acid | C12 H22 O4 | 230.15199 | 6.431 | 229.14459 | 0.481514948 | 0.049369292 | 1.168029781 | ↓ |
| Valylproline | C10 H18 N2 O3 | 214.13168 | 4.854 | 215.1389 | 0.343585077 | 8.40E-09 | 2.64785332 | ↓ |
| Thymine | C5 H6 N2 O2 | 126.0429 | 3.159 | 127.05018 | 0.198917885 | 2.03E-08 | 2.785350048 | ↓ |
| Uracil | C4 H4 N2 O2 | 112.02728 | 1.531 | 113.03457 | 0.379399616 | 3.61E-08 | 2.677367426 | ↓ |
| Piperine | C17 H19 N O3 | 285.13611 | 6.643 | 286.14334 | 4.733564975 | 1.28E-07 | 3.026732723 | ↑ |
| PB-22 N-(4-Hydroxypentyl)-3-carboxyindole metabolite | C14 H17 N O3 | 247.12476 | 2.565 | 248.13203 | 0.449262953 | 2.09E-06 | 2.051680475 | ↓ |
| Leucylproline | C11 H20 N2 O3 | 211.12087 | 5.152 | 212.12804 | 0.45765185 | 2.12E-06 | 2.25763025 | ↓ |
| DGMG (18:2) | C33 H58 O14 | 678.38193 | 4.815 | 340.19824 | 0.474566364 | 2.25E-06 | 2.322116646 | ↓ |
| Terephthalic Acid | C8 H6 O4 | 166.02661 | 1.395 | 167.03358 | 0.39908337 | 3.16E-06 | 2.148515431 | ↓ |
| L-Alanyl-L-proline | C8 H14 N2 O3 | 186.10037 | 1.963 | 187.10754 | 0.441688277 | 3.56E-06 | 2.2883557 | ↓ |
| Gly-Ile | C8 H16 N2 O3 | 188.11602 | 5.043 | 189.12299 | 0.499084479 | 1.21E-05 | 2.017783223 | ↓ |
| Val-Ser | C8 H16 N2 O4 | 204.111 | 1.436 | 205.118 | 0.527597027 | 1.65E-05 | 2.253799133 | ↓ |
| Benzyl cinnamate | C16 H14 O2 | 238.09511 | 3.657 | 239.10239 | 0.566862411 | 1.82E-05 | 1.880622872 | ↓ |
| Trigonelline | C7 H7 N O2 | 137.04771 | 2.636 | 138.05502 | 0.430697041 | 2.79E-05 | 2.049615469 | ↓ |
| DL-Citrulline | C6 H13 N3 O3 | 175.09577 | 5.16 | 176.1031 | 0.60420729 | 6.05E-05 | 2.03655465 | ↓ |
| 2-Arachidonoyl glycerol | C23 H38 O4 | 378.27541 | 7.652 | 379.28268 | 0.30578716 | 7.95E-05 | 1.948571253 | ↓ |
| tert-Butyl N-[1-(aminocarbonyl)-3-methylbutyl]carbamate | C11 H22 N2 O3 | 230.16293 | 5.091 | 231.17026 | 0.411069401 | 0.000101881 | 1.834436532 | ↓ |
| trans-4-Phenyl-4-piperidinocyclohexanol | C17 H25 N O | 259.18954 | 4.862 | 260.19669 | 0.600072068 | 0.000114598 | 1.919190237 | ↓ |
| Glu-Thr | C9 H16 N2 O6 | 248.10065 | 1.427 | 249.10747 | 0.617115421 | 0.000129054 | 1.884253841 | ↓ |
| 2-Hydroxy-6-Aminopurine | C5 H5 N5 O | 151.0494 | 1.445 | 152.0565 | 0.428248356 | 0.00015172 | 2.059657316 | ↓ |
| Glycyl-L-leucine | C8 H16 N2 O3 | 188.11604 | 3.974 | 189.12325 | 0.455526892 | 0.000301004 | 1.860991012 | ↓ |
| 1-Methylxanthine | C6 H6 N4 O2 | 166.04914 | 5.136 | 167.05644 | 0.270977198 | 0.000302473 | 1.956432786 | ↓ |
| D-Glucosamine 6-phosphate | C6 H14 N O8 P | 259.04579 | 1.386 | 260.05283 | 0.560953861 | 0.000433911 | 1.674661276 | ↓ |
| Cytidine | C9 H13 N3 O5 | 243.08561 | 1.442 | 244.09271 | 0.543003603 | 0.000467876 | 1.79687048 | ↓ |
| L-(-)-Methionine | C5 H11 N O2 S | 149.05107 | 1.931 | 150.05832 | 0.583836971 | 0.000560859 | 1.757101152 | ↓ |
| Nicotinamide N-oxide | C6 H6 N2 O2 | 138.04284 | 1.961 | 139.05005 | 0.612527819 | 0.000578539 | 1.55265947 | ↓ |
| 3-Hydroxylidocaine | C14 H22 N2 O2 | 125.08397 | 5.13 | 126.09141 | 0.565099476 | 0.000811466 | 1.570575062 | ↓ |
| Ecgonine methyl ester | C10 H17 N O3 | 199.12081 | 5.013 | 200.12778 | 0.403212601 | 0.00103933 | 1.796779409 | ↓ |
| Thr-Leu | C10 H20 N2 O4 | 232.14219 | 5.106 | 233.1494 | 0.553761092 | 0.001201733 | 1.700040789 | ↓ |
| 3,4-Dimethylbenzoic acid | C9 H10 O2 | 150.068 | 8.562 | 151.07521 | 1.81740248 | 0.00126971 | 1.429918969 | ↑ |
| 2'-Deoxycytidine | C9 H13 N3 O4 | 227.0905 | 1.442 | 228.09752 | 0.583325266 | 0.001289342 | 1.667165182 | ↓ |
| D-(+)-Glucose | C6 H12 O6 | 197.08988 | 1.358 | 198.09694 | 0.636873531 | 0.001797551 | 1.799768468 | ↓ |
| Acetyl-L-carnitine | C9 H17 N O4 | 203.11585 | 1.448 | 204.12331 | 0.641473007 | 0.002056622 | 1.374293765 | ↓ |
| 5'-Adenylic acid | C10 H14 N5 O7 P | 347.06291 | 4.811 | 348.07019 | 0.552435514 | 0.002513551 | 1.586537022 | ↓ |
| Phytosphingosine | C18 H39 N O3 | 317.2929 | 6.786 | 318.30011 | 1.744036895 | 0.002708768 | 1.543481727 | ↑ |
| Cyanidin | C15 H10 O6 | 286.05 | 1.176 | 287.05716 | 0.377099177 | 0.002966313 | 1.51989305 | ↓ |
| 2'-Deoxyuridine | C9 H12 N2 O5 | 228.07438 | 3.024 | 229.08186 | 0.463680396 | 0.003009255 | 1.555107823 | ↓ |
| N alpha-Acetyl-L-Arginine | C8 H16 N4 O3 | 216.12137 | 6.498 | 217.12865 | 2.472983303 | 0.003308061 | 2.610368051 | ↑ |
| Pantothenic acid | C9 H17 N O5 | 219.11061 | 5.092 | 220.11798 | 0.632551916 | 0.003781356 | 1.26760607 | ↓ |
| Ala-Gln | C8 H15 N3 O4 | 217.10623 | 1.399 | 218.11324 | 0.599859284 | 0.004003189 | 1.387970756 | ↓ |
| (+/-)-CP 47,497-C7-Hydroxy metabolite | C21 H34 O3 | 334.25051 | 8.387 | 335.25787 | 2.272083455 | 0.004120771 | 1.417107498 | ↑ |
| 8-Aminooctanoic acid | C8 H17 N O2 | 159.12632 | 1.261 | 160.13361 | 0.585696001 | 0.004137598 | 1.441641567 | ↓ |
| δ-Valerolactam | C5 H9 N O | 117.07854 | 8.377 | 118.08569 | 2.085167195 | 0.004306638 | 1.89305603 | ↑ |
| Urocanic acid | C6 H6 N2 O2 | 155.06951 | 1.446 | 156.07675 | 0.520758713 | 0.005489542 | 1.52878512 | ↓ |
| Latanoprost | C26 H40 O5 | 432.28708 | 7.189 | 433.29459 | 0.565768532 | 0.005627074 | 1.134461698 | ↓ |
| (-)-Caryophyllene oxide | C15 H24 O | 220.18265 | 8.185 | 221.18965 | 0.56541646 | 0.005660608 | 1.415540558 | ↓ |
| 3-Methylhistamine | C6 H11 N3 | 125.09539 | 1.282 | 126.10268 | 0.35961259 | 0.005693242 | 1.612181879 | ↓ |
| Folinic acid | C20 H23 N7 O7 | 473.16573 | 5.035 | 474.17252 | 2.57390296 | 0.005738526 | 1.116460796 | ↑ |
| Histamine | C5 H9 N3 | 111.07967 | 1.243 | 112.08678 | 0.420437046 | 0.00604925 | 1.391894341 | ↓ |
| Pantothenate | C9 H17 N O5 | 219.11013 | 5.167 | 220.1174 | 0.626750052 | 0.006073528 | 1.292086724 | ↓ |
| D-Carnitine | C7 H15 N O3 | 161.10505 | 6.546 | 162.11205 | 2.2291714 | 0.006119731 | 1.357395892 | ↑ |
| N8-Acetylspermidine | C9 H21 N3 O | 187.1685 | 1.312 | 188.17569 | 0.566403804 | 0.00641421 | 1.49064276 | ↓ |
| Ornithine | C5 H12 N2 O2 | 132.08987 | 1.163 | 133.09715 | 0.606136612 | 0.007307658 | 1.261817895 | ↓ |
| 2-Amino-6-methylmercaptopurine | C6 H7 N5 S | 181.04217 | 6.543 | 182.04965 | 0.546997568 | 0.007430665 | 1.619628901 | ↓ |
| 3-Succinoylpyridine | C9 H9 N O3 | 179.05845 | 4.892 | 180.06578 | 0.482204197 | 0.00828222 | 1.319850272 | ↓ |
| Zerumbone | C15 H22 O | 218.16699 | 8.836 | 219.17429 | 0.338140729 | 0.009254386 | 1.600391296 | ↓ |
| ACar 16:3 | C23 H40 N O4 | 393.28774 | 6.513 | 394.29529 | 8.268487067 | 0.009425515 | 1.381630686 | ↑ |
| Trolox | C14 H18 O4 | 250.11811 | 5.97 | 251.12553 | 0.471138657 | 0.011895754 | 1.214957534 | ↓ |
| D-Erythrose 4-phosphate | C4 H9 O7 P | 200.00876 | 1.297 | 218.04259 | 0.37556301 | 0.014625678 | 1.33328365 | ↓ |
| Glycylproline | C7 H12 N2 O3 | 172.08478 | 1.448 | 173.09221 | 0.568069456 | 0.014782949 | 1.434061262 | ↓ |
| Benzamide | C7 H7 N O | 121.05035 | 4.986 | 122.0576 | 1.926293023 | 0.015183335 | 1.200258454 | ↑ |
| α-Aspartylphenylalanine | C13 H16 N2 O5 | 280.10581 | 4.826 | 281.11282 | 0.655864865 | 0.015884805 | 1.179479449 | ↓ |
| Ecdysterone | C27 H44 O7 | 480.30767 | 6.882 | 481.31473 | 0.632853866 | 0.015978239 | 1.451618227 | ↓ |
| D-Ala-D-Ala | C6 H12 N2 O3 | 160.08465 | 1.46 | 183.07387 | 0.647462555 | 0.016321484 | 1.256086314 | ↓ |
| (+/-)-Equol | C15 H14 O3 | 242.09413 | 6.095 | 243.10165 | 0.518052366 | 0.016685395 | 1.023929447 | ↓ |
| All-Trans-13,14-Dihydroretinol | C20 H32 O | 288.24487 | 7.991 | 289.25201 | 1.918867585 | 0.018005511 | 1.088774362 | ↑ |
| Phosphocholine | C5 H15 Cl N O4 P | 219.04254 | 1.152 | 220.05003 | 2.290656753 | 0.018273788 | 1.207671997 | ↑ |
| Monoolein | C21 H40 O4 | 356.29223 | 9.842 | 357.29922 | 3.651402521 | 0.01873273 | 1.381768822 | ↑ |
| Riboflavin-5-phosphate | C17 H21 N4 O9 P | 456.10314 | 5.428 | 457.11041 | 0.619100088 | 0.018810747 | 1.227395613 | ↓ |
| DL-α-Aminocaprylic acid | C8 H17 N O2 | 159.12594 | 4.002 | 160.13335 | 0.321258952 | 0.019742917 | 1.396162407 | ↓ |
| Spermidine | C7 H19 N3 | 145.15808 | 4.784 | 146.16536 | 0.570113766 | 0.02068699 | 1.018328639 | ↓ |
| 4-Methyl-5-thiazoleethanol | C6 H9 N O S | 143.04055 | 1.322 | 144.04782 | 0.601317528 | 0.020722232 | 1.143982641 | ↓ |
| ACar 16:2 | C23 H42 N O4 | 395.30328 | 6.644 | 396.31042 | 3.386104864 | 0.020980549 | 1.62307177 | ↑ |
| α-Linolenoyl ethanolamide | C20 H35 N O2 | 304.24019 | 7.341 | 322.27402 | 1.84591652 | 0.021095768 | 1.117876949 | ↑ |
| 8Z,11Z,14Z-Eicosatrienoic acid | C20 H34 O2 | 306.25574 | 7.986 | 307.26324 | 1.925504057 | 0.021571165 | 1.048703376 | ↑ |
| 5-Hydroxyindole | C8 H7 N O | 133.0527 | 5.014 | 134.06024 | 0.530169367 | 0.021602256 | 1.166606072 | ↓ |
| LPC 14:0 | C22 H46 N O7 P | 467.30125 | 8.448 | 468.30823 | 2.519236459 | 0.022209955 | 1.129837419 | ↑ |
| ACar 18:2 | C25 H46 N O4 | 423.33438 | 7.067 | 424.3414 | 4.131509916 | 0.022318427 | 1.556875823 | ↑ |
| β-Nicotinamide mononucleotide | C11 H15 N2 O8 P | 334.05679 | 1.438 | 335.064 | 3.953465296 | 0.023741634 | 1.324154589 | ↑ |
| Phylloquinone | C31 H46 O2 | 450.34905 | 7.603 | 451.35641 | 0.130203047 | 0.026647215 | 1.568835651 | ↓ |
| ACar 15:1 | C22 H42 N O4 | 383.30344 | 6.702 | 384.31104 | 2.195731083 | 0.026647864 | 1.378696879 | ↑ |
| Phenethylamine | C8 H11 N | 121.08919 | 5.072 | 122.09646 | 6.340370275 | 0.02791603 | 1.146313867 | ↑ |
| Coniferin | C16 H22 O8 | 364.11175 | 1.366 | 347.10864 | 0.62833702 | 0.028011794 | 1.094906716 | ↓ |
| delta-Hydroxylysine | C6 H14 N2 O3 | 162.10041 | 1.157 | 163.10767 | 3.356721549 | 0.02905854 | 1.133199406 | ↑ |
| 20-Carboxy-Leukotriene B4 | C20 H30 O6 | 366.20323 | 7.112 | 367.21051 | 0.471462416 | 0.029288841 | 1.237155237 | ↓ |
| ACar 12:0 | C19 H38 N O4 | 343.27182 | 6.353 | 344.27939 | 4.459492791 | 0.033056049 | 1.467277967 | ↑ |
| Tryptamine | C10 H12 N2 | 178.11072 | 5.327 | 179.11807 | 4.43577065 | 0.033143039 | 1.071919166 | ↑ |
| Maslinic acid | C30 H48 O4 | 966.69235 | 8.779 | 967.69971 | 0.125638432 | 0.034390547 | 1.380400565 | ↓ |
| ACar 15:0 | C22 H44 N O4 | 385.31932 | 6.755 | 386.32678 | 1.750508819 | 0.035566764 | 1.19873321 | ↑ |
| Oxymatrine | C15 H24 N2 O2 | 264.18718 | 8.818 | 265.19446 | 0.562314195 | 0.035905982 | 1.464104815 | ↓ |
| Ala-Ile | C9 H18 N2 O3 | 202.13174 | 5.096 | 203.13898 | 0.661534694 | 0.038863895 | 1.269327612 | ↓ |
| N-Acetylhistidine | C8 H11 N3 O3 | 197.07994 | 3.381 | 198.0873 | 0.59125786 | 0.041882185 | 1.159940769 | ↓ |
| Oxaceprol | C7 H11 N O4 | 173.06881 | 1.471 | 174.0759 | 0.585784659 | 0.044433478 | 1.247541947 | ↓ |
| Nicotinamide adenine dinucleotide | C21 H27 N7 O14 P2 | 663.10959 | 1.462 | 664.11725 | 2.297985236 | 0.044888489 | 1.05365082 | ↑ |
| 6β-Hydrocodol N-oxide | C18 H23 N O4 | 317.16579 | 6.521 | 318.17343 | 2.290535056 | 0.04537703 | 1.035386034 | ↑ |
| PC (14:0e/3:0) | C25 H52 N O7 P | 509.34865 | 9.772 | 510.3558 | 2.839071471 | 0.047775068 | 1.17506122 | ↑ |

Abbreviations: RT, retention time; m/z, mass-to-charge ratio; FC, fold change; VIP, variable important in projection; ↑, up-regulated; ↓, down-regulated

Supplementary Table S2: Differential metabolites between ATB and LTBI

| Name | Formula | Molecular Weight | RT [min] | m/z | FC | Pvalue | VIP | Trend (based on LTBI) |
| --- | --- | --- | --- | --- | --- | --- | --- | --- |
| Prostaglandin E2 | C20 H32 O5 | 388.20001 | 6.181 | 387.19284 | 266.3125515 | 1.68E-10 | 2.755929049 | ↑ |
| N'2-acetylpyridine-2-carbohydrazide | C8 H9 N3 O2 | 179.06978 | 1.746 | 178.06248 | 12.64048133 | 3.81E-08 | 2.536283461 | ↑ |
| Bicyclo Prostaglandin E2 | C20 H30 O4 | 370.19969 | 6.015 | 369.1926 | 0.33648434 | 1.37E-07 | 2.019023064 | ↓ |
| LysoPC 12:1 | C20 H36 N O7 P | 433.22111 | 6.047 | 432.21384 | 0.237456515 | 2.02E-07 | 1.803315451 | ↓ |
| LPE 15:0 | C20 H42 N O7 P | 439.27008 | 8.719 | 438.26303 | 0.160400701 | 7.02E-07 | 2.06878463 | ↓ |
| N-{3-[(3,5-difluorobenzyl)oxy]pyridin-2-yl}-4-pentylbenzenesulfonamide | C23 H24 F2 N2 O3 S | 446.14373 | 6.297 | 445.13632 | 12.83076499 | 1.16E-06 | 2.33698483 | ↑ |
| Kynurenic acid | C10 H7 N O3 | 189.0431 | 5.407 | 188.0356 | 0.335196618 | 1.21E-06 | 1.934330528 | ↓ |
| LPE 14:0 | C19 H40 N O7 P | 425.25459 | 8.408 | 424.24738 | 0.105291723 | 1.59E-06 | 2.079276726 | ↓ |
| Indole-3-carboxaldehyde | C9 H7 N O | 145.05313 | 5.727 | 144.04585 | 0.36728096 | 1.99E-06 | 1.771601643 | ↓ |
| LPC 20:4 | C28 H50 N O7 P | 589.33811 | 8.922 | 588.33118 | 0.41121452 | 2.32E-06 | 1.837917301 | ↓ |
| LPE 12:0 | C17 H36 N O7 P | 397.22306 | 7.57 | 396.21561 | 0.334776824 | 3.89E-06 | 2.034347144 | ↓ |
| 5-Hydroxyindole-2-carboxylic acid | C9 H7 N O3 | 177.04283 | 2.415 | 176.03505 | 3.248246862 | 4.72E-06 | 1.925091859 | ↑ |
| 23-Norcholic acid | C23 H38 O5 | 394.27233 | 6.83 | 393.26505 | 0.480818183 | 5.27E-06 | 1.957983058 | ↓ |
| LPE 18:1 | C23 H46 N O7 P | 479.30144 | 9.486 | 478.2944 | 0.046291926 | 6.95E-06 | 2.167418455 | ↓ |
| 13,14-dihydro-15-keto-tetranor Prostaglandin E2 | C16 H26 O5 | 298.17843 | 6.054 | 297.17087 | 0.374626567 | 9.10E-06 | 1.720706644 | ↓ |
| 13,14-dihydro Prostaglandin E1 | C20 H36 O5 | 356.25678 | 8.369 | 355.24942 | 0.396232849 | 1.02E-05 | 1.655945022 | ↓ |
| Abametapir | C12 H12 N2 | 184.10046 | 5.647 | 183.09323 | 0.490612024 | 1.35E-05 | 1.85394405 | ↓ |
| Prostaglandin A3 | C20 H28 O4 | 664.39821 | 6.705 | 663.39093 | 12.54728054 | 1.41E-05 | 2.111940976 | ↑ |
| Homotaurine | C3 H9 N O3 S | 139.03076 | 1.36 | 138.02348 | 0.2937817 | 1.76E-05 | 1.696781949 | ↓ |
| 3-[(methoxycarbonyl)amino]-2,2,3-trimethylbutanoic acid | C9 H17 N O4 | 203.11617 | 5.708 | 202.10889 | 0.254910663 | 2.24E-05 | 1.508623782 | ↓ |
| 5-Hydroxytryptophan | C11 H12 N2 O3 | 220.08525 | 5 | 219.07784 | 0.52812329 | 2.47E-05 | 1.71857099 | ↓ |
| Prostaglandin F2alpha | C20 H34 O5 | 354.2411 | 7.437 | 353.23383 | 0.458212198 | 2.57E-05 | 1.804769333 | ↓ |
| 8(S),15(S)-DiHETE | C20 H32 O4 | 336.23052 | 6.843 | 335.22324 | 0.43738725 | 2.88E-05 | 1.707690393 | ↓ |
| Lysopc 16:1 | C24 H48 N O7 P | 493.3192 | 8.121 | 492.31192 | 0.181536892 | 3.32E-05 | 1.826626065 | ↓ |
| 8-iso-15-keto Prostaglandin E2 | C20 H30 O5 | 700.41946 | 6.482 | 699.41223 | 27.24392241 | 3.34E-05 | 2.062663449 | ↑ |
| Tetrahydroaldosterone | C21 H32 O5 | 364.22542 | 7.108 | 363.21799 | 0.446958777 | 3.47E-05 | 1.677716304 | ↓ |
| (2-oxo-2,3-dihydro-1H-indol-3-yl)acetic acid | C10 H9 N O3 | 191.05854 | 5.53 | 190.05122 | 0.187419322 | 3.65E-05 | 1.595025606 | ↓ |
| LPE 16:1 | C21 H42 N O7 P | 451.27027 | 9.02 | 450.263 | 0.154464703 | 3.66E-05 | 1.663497324 | ↓ |
| 3-(3-Methoxyphenyl)propionic acid | C10 H12 O3 | 180.079 | 7.407 | 179.07172 | 0.326388522 | 3.75E-05 | 1.557489234 | ↓ |
| 7-Hydroxy-3,4-dihydrocarbostyril | C9 H9 N O2 | 163.06364 | 5.357 | 162.05634 | 0.139574691 | 3.84E-05 | 1.685364507 | ↓ |
| N-Acetyl-α-D-glucosamine 1-phosphate | C8 H16 N O9 P | 301.05632 | 1.514 | 300.04901 | 0.192101342 | 4.23E-05 | 1.739719029 | ↓ |
| L-Saccharopine | C11 H20 N2 O6 | 276.13251 | 1.464 | 275.12534 | 0.493160005 | 4.63E-05 | 1.608296043 | ↓ |
| Dodecanedioic acid | C12 H22 O4 | 230.15199 | 6.431 | 229.14459 | 0.427283929 | 4.86E-05 | 1.574978434 | ↓ |
| Tropolone | C7 H6 O2 | 122.03712 | 6.554 | 121.02985 | 0.54276362 | 5.21E-05 | 1.900275764 | ↓ |
| (±)9-HpODE | C18 H32 O4 | 312.23029 | 6.821 | 311.22311 | 0.537384227 | 5.28E-05 | 1.699667366 | ↓ |
| D-Mannose 6-phosphate | C6 H13 O9 P | 260.02995 | 1.25 | 259.02249 | 0.110861439 | 5.43E-05 | 1.60786142 | ↓ |
| Prostaglandin A1 | C20 H32 O4 | 318.21962 | 7.763 | 317.21222 | 0.043040004 | 5.44E-05 | 1.860176107 | ↓ |
| D-Glucuronic acid | C6 H10 O7 | 194.0418 | 6.066 | 387.07632 | 3.274303593 | 5.94E-05 | 1.70047755 | ↑ |
| O-Aceyl-L-Serine | C5 H9 N O4 | 147.05346 | 5.084 | 146.04607 | 0.43305125 | 5.94E-05 | 1.574631563 | ↓ |
| 4-chloro-2-(1H-pyrazol-3-yl)phenol | C9 H7 Cl N2 O | 194.02527 | 3.471 | 193.01799 | 0.082067865 | 6.56E-05 | 1.755370426 | ↓ |
| tetranor-PGFM | C16 H26 O7 | 312.15742 | 5.53 | 311.15015 | 0.229179639 | 9.66E-05 | 1.626993057 | ↓ |
| FAHFA (3:0/18:0) | C21 H40 O4 | 356.29316 | 9.907 | 355.28583 | 0.071095986 | 0.000101062 | 1.72119062 | ↓ |
| 5-oxoproline | C5 H7 N O3 | 129.04295 | 5.37 | 128.03568 | 0.615450535 | 0.000132777 | 1.560151547 | ↓ |
| Pyridoxine O-Glucoside | C14 H21 N O8 | 331.12703 | 1.986 | 330.11975 | 0.473576284 | 0.00013801 | 1.315568179 | ↓ |
| L-(-)-Glyceric acid | C3 H6 O4 | 106.02683 | 1.444 | 105.01954 | 0.384976598 | 0.000155848 | 1.587178014 | ↓ |
| 2-Furoylglycine | C7 H7 N O4 | 169.03792 | 5.347 | 168.0307 | 0.575004759 | 0.000159521 | 1.405186095 | ↓ |
| 2'-Deoxyadenosine 5'-monophosphate | C10 H14 N5 O6 P | 331.0683 | 1.899 | 330.06104 | 0.11593845 | 0.000168902 | 1.324156456 | ↓ |
| 4-(4-nitrophenylazo)aniline | C12 H10 N4 O2 | 242.0808 | 3.343 | 241.07364 | 4.660351965 | 0.000172633 | 1.882276661 | ↑ |
| Cyclohexylsulfamate | C6 H13 N O3 S | 179.06194 | 1.95 | 178.05496 | 0.16216682 | 0.000179246 | 1.955565334 | ↓ |
| Delta-Tridecalactone | C13 H24 O2 | 212.17801 | 6.617 | 211.17111 | 0.471145467 | 0.000185109 | 1.430869866 | ↓ |
| N-(1-benzylpiperidin-4-yl)-5-methoxy-1H-indole-2-carboxamide | C22 H25 N3 O2 | 363.19097 | 2.056 | 362.18369 | 0.409432445 | 0.000189636 | 1.647309302 | ↓ |
| 11-deoxy Corticosterone | C21 H30 O3 | 376.22676 | 6.42 | 375.22 | 0.478890618 | 0.000202039 | 1.387603768 | ↓ |
| tetranor-PGDM | C16 H24 O7 | 310.14186 | 5.518 | 309.13443 | 0.604206715 | 0.000210634 | 1.524109053 | ↓ |
| Methyl 3-indolyacetate | C11 H11 N O2 | 189.07955 | 5.469 | 188.07224 | 0.412856609 | 0.000215078 | 1.310382286 | ↓ |
| L-Tyrosinemethylester | C10 H13 N O3 | 195.08984 | 5.598 | 194.08247 | 0.50452534 | 0.000220846 | 1.456220816 | ↓ |
| 12-oxo Phytodienoic Acid | C18 H28 O3 | 292.20425 | 7.097 | 291.19672 | 0.193840551 | 0.000244818 | 1.507073804 | ↓ |
| 2-[(carboxymethyl)(methyl)amino]-5-methoxybenzoic acid | C11 H13 N O5 | 239.07982 | 3.108 | 238.07257 | 0.319211336 | 0.00024675 | 1.529349099 | ↓ |
| LPE 17:1 | C22 H44 N O7 P | 465.28615 | 9.115 | 464.27884 | 0.129278348 | 0.000265122 | 1.683255302 | ↓ |
| N-acetyl-D-glucosamine | C8 H15 N O6 | 221.09026 | 1.394 | 220.08284 | 0.625607011 | 0.000293372 | 1.42997321 | ↓ |
| Prostaglandin E1 | C20 H34 O5 | 390.21593 | 6.322 | 389.20868 | 0.40379025 | 0.000301046 | 1.443917585 | ↓ |
| Cannabigerolic acid | C22 H32 O4 | 157.1122 | 5.998 | 359.2226 | 2.149891027 | 0.000308914 | 1.946118816 | ↑ |
| Gly-Tyr-Ala | C14 H19 N3 O5 | 309.1329 | 5.188 | 308.12546 | 0.542981931 | 0.000338749 | 1.451036136 | ↓ |
| Tyrosylalanine | C12 H16 N2 O4 | 252.11141 | 2.873 | 251.10416 | 0.323885002 | 0.000363921 | 1.448517854 | ↓ |
| LPE 15:1 | C20 H40 N O7 P | 437.2546 | 8.587 | 436.24707 | 0.148054766 | 0.000363995 | 1.451178003 | ↓ |
| 5-OxoETE | C20 H30 O3 | 318.21877 | 7.873 | 317.21191 | 0.221759694 | 0.000368486 | 1.512089527 | ↓ |
| Guanosine monophosphate | C10 H14 N5 O8 P | 363.05688 | 2.497 | 362.04935 | 4.468661706 | 0.000368671 | 1.556288374 | ↑ |
| 6-Methoxy-2-naphthoic acid | C12 H10 O3 | 202.06374 | 5.285 | 201.05649 | 0.53231102 | 0.000370898 | 1.39949342 | ↓ |
| Toradol | C15 H13 N O3 | 255.08567 | 2.462 | 254.07835 | 0.466601062 | 0.000371012 | 1.412297889 | ↓ |
| Alanyltyrosine | C12 H16 N2 O4 | 252.11067 | 3.813 | 251.10341 | 0.277334839 | 0.000390767 | 1.396099788 | ↓ |
| LPE 16:0 | C21 H44 N O7 P | 453.28599 | 9.098 | 452.27841 | 0.232268035 | 0.000404748 | 1.487872252 | ↓ |
| Cymarin | C30 H44 O9 | 548.2998 | 7.913 | 547.29236 | 4.864270202 | 0.000446396 | 1.47463285 | ↑ |
| (±)12(13)-DiHOME | C18 H34 O4 | 314.2458 | 7.231 | 313.23849 | 0.440738347 | 0.000502781 | 1.537363769 | ↓ |
| LPE 17:0 | C22 H46 N O7 P | 467.30178 | 9.591 | 466.29443 | 0.276525428 | 0.000504084 | 1.670935535 | ↓ |
| 1-(3-phenylpropanoyl)-4-piperidinecarboxylic acid | C15 H19 N O3 | 261.13286 | 3.96 | 260.12558 | 0.560497716 | 0.000510821 | 1.487021352 | ↓ |
| D-Alanyl-D-alanine | C6 H12 N2 O3 | 160.0851 | 1.41 | 159.07791 | 0.56855378 | 0.000536535 | 1.451402788 | ↓ |
| N-acetyl-L-ornithine | C7 H14 N2 O3 | 174.1009 | 2.001 | 173.09363 | 0.555099983 | 0.000546599 | 1.339586189 | ↓ |
| Pantetheine | C11 H22 N2 O4 S | 278.13025 | 5.89 | 277.12305 | 0.399325442 | 0.000550432 | 1.640890815 | ↓ |
| 2-(2-oxo-2-{[2-(2-oxo-1-imidazolidinyl)ethyl]amino}ethoxy)acetic acid | C9 H15 N3 O5 | 245.10149 | 1.45 | 244.0941 | 0.614786567 | 0.000554617 | 1.423605439 | ↓ |
| 3-Phosphoglyceric acid | C3 H7 O7 P | 185.9933 | 1.563 | 184.98607 | 0.572627186 | 0.000611715 | 1.331150734 | ↓ |
| (±)9(10)-DiHOME | C18 H34 O4 | 314.24582 | 7.336 | 313.23862 | 0.382972 | 0.000630779 | 1.416320691 | ↓ |
| 10-Nitrolinoleate | C18 H31 N O4 | 325.22541 | 8.682 | 324.2182 | 0.501191965 | 0.000678826 | 1.60396475 | ↓ |
| D-2-Aminoadipic acid | C6 H11 N O4 | 161.06911 | 2.225 | 160.06192 | 2.012131026 | 0.000704995 | 1.58313166 | ↑ |
| LPC 18:0 | C26 H54 N O7 P | 569.36977 | 10.187 | 568.36279 | 0.160566135 | 0.000707534 | 1.724841337 | ↓ |
| L-Leucyl-L-alanine Hydrate | C9 H18 N2 O3 | 202.13233 | 4.821 | 201.12518 | 0.509974166 | 0.000713699 | 1.443155286 | ↓ |
| alpha-Benzylsuccinic acid | C11 H12 O4 | 208.07392 | 5.504 | 207.06642 | 0.517741668 | 0.000734195 | 1.384294637 | ↓ |
| β-Estradiol-17β-glucuronide | C24 H32 O8 | 448.21325 | 6.138 | 447.20605 | 0.443880796 | 0.000762996 | 1.486877371 | ↓ |
| 3-Methoxytyramine | C9 H13 N O2 | 167.09511 | 5.388 | 166.08748 | 0.615155475 | 0.000764857 | 1.331013592 | ↓ |
| D-Ribulose 1,5-bisphosphate | C5 H12 O11 P2 | 309.98592 | 1.435 | 308.97867 | 0.302685899 | 0.000827927 | 1.522171278 | ↓ |
| Propylparaben | C10 H12 O3 | 180.07903 | 6.217 | 179.07169 | 0.393182528 | 0.000838598 | 1.406107609 | ↓ |
| Tyramine | C8 H11 N O | 137.08431 | 5.613 | 136.07697 | 0.519624369 | 0.000844577 | 1.518212844 | ↓ |
| Glycerol 3-phosphate | C3 H9 O6 P | 172.0141 | 1.516 | 171.00685 | 0.343865377 | 0.000925053 | 1.352497454 | ↓ |
| 13,14-dihydro-15-keto-tetranor Prostaglandin D2 | C16 H26 O5 | 280.16771 | 6.094 | 279.16034 | 0.235647944 | 0.000960305 | 1.088342206 | ↓ |
| 20-hydroxy Leukotriene B4 | C20 H32 O5 | 370.23615 | 6.886 | 369.22861 | 0.623813411 | 0.001033051 | 1.743113236 | ↓ |
| Deoxycholic Acid | C24 H40 O4 | 392.29263 | 7.225 | 391.28543 | 0.322501096 | 0.001072827 | 1.424660375 | ↓ |
| 13,14-dihydro-19(R)-hydroxy Prostaglandin E1 | C20 H36 O6 | 354.24125 | 6.188 | 353.23404 | 0.351402025 | 0.001101648 | 1.453526351 | ↓ |
| Glycoursodeoxycholic acid | C26 H43 N O5 | 449.3226 | 7.124 | 448.31519 | 0.425898787 | 0.001152451 | 1.421370968 | ↓ |
| Pyridoxal 5'-phosphate hydrate | C8 H10 N O6 P | 247.02359 | 4.829 | 246.01631 | 0.46828 | 0.001198932 | 1.330537335 | ↓ |
| 13,14-dihydro-15-keto Prostaglandin A2 | C20 H30 O4 | 316.204 | 7.898 | 315.1969 | 0.560132648 | 0.001210608 | 1.3116412 | ↓ |
| NSI-189 | C22 H30 N4 O | 366.24101 | 7.792 | 365.23364 | 0.07993158 | 0.001219944 | 1.18172669 | ↓ |
| Nicotinate ribonucleoside | C11 H13 N O6 | 255.07489 | 5.179 | 254.06763 | 0.498179146 | 0.001221024 | 1.454895756 | ↓ |
| DL-o-Tyrosine | C9 H11 N O3 | 181.07427 | 5.93 | 180.06697 | 0.418482694 | 0.001233451 | 1.321679623 | ↓ |
| D-Fructose 6-phosphate | C6 H13 O9 P | 260.02995 | 1.615 | 259.02267 | 0.111839724 | 0.001241049 | 1.61110286 | ↓ |
| 6-Keto-prostaglandin f1alpha | C20 H34 O6 | 370.23561 | 7.599 | 369.22833 | 0.456034337 | 0.001248584 | 1.346805876 | ↓ |
| LPE 13:0 | C18 H38 N O7 P | 411.23885 | 7.865 | 410.23166 | 0.325470397 | 0.001249415 | 1.397408029 | ↓ |
| HexCer-AP (t18:0/16:0) | C40 H79 N O10 | 779.57629 | 11.015 | 778.56903 | 2.111823552 | 0.001281416 | 1.434334238 | ↑ |
| Lysopc 14:0 | C22 H46 N O7 P | 467.29983 | 5.669 | 466.29279 | 0.498538857 | 0.001283758 | 1.428974238 | ↓ |
| Nicotinamide | C6 H6 N2 O | 122.04837 | 5.159 | 121.04108 | 0.63128132 | 0.001289461 | 1.537379951 | ↓ |
| 5beta-Androstane-3,17-dione | C19 H28 O2 | 288.20923 | 7.326 | 287.20248 | 0.401552487 | 0.001299405 | 1.474581123 | ↓ |
| D-myo-Inositol 1,4-bisphosphate | C6 H14 O12 P2 | 339.99648 | 1.564 | 338.98932 | 0.134142389 | 0.001299954 | 1.864283702 | ↓ |
| 3-[4-methyl-1-(2-methylpropanoyl)-3-oxocyclohexyl]butanoic acid | C15 H24 O4 | 268.16899 | 6.053 | 267.1608 | 0.379382146 | 0.001313533 | 1.122706168 | ↓ |
| 2-(acetylamino)-4-(methylthio)butanoic acid | C7 H13 N O3 S | 191.05867 | 5.203 | 236.05695 | 0.554226257 | 0.001390111 | 1.368729683 | ↓ |
| Tetradecanedioic acid | C14 H26 O4 | 258.18345 | 6.922 | 257.17615 | 0.542680382 | 0.00141936 | 1.320450481 | ↓ |
| N1-[4-(trifluoromethyl)phenyl]-2-phenylbutanamide | C17 H16 F3 N O | 307.11972 | 3.946 | 306.11261 | 0.542772215 | 0.001445992 | 1.355853594 | ↓ |
| β-Estradiol 3-(β-D-glucuronide) 17-sulfate | C24 H32 O11 S | 528.16991 | 9.359 | 527.16382 | 0.570387871 | 0.001483043 | 1.2913994 | ↓ |
| LPS 17:1 | C23 H44 N O9 P | 509.27604 | 7.336 | 508.26877 | 0.577332221 | 0.001506714 | 1.488075372 | ↓ |
| Phellamurin | C26 H30 O11 | 518.18513 | 2.857 | 517.17761 | 0.414134664 | 0.001507769 | 1.530108135 | ↓ |
| Traumatic acid | C12 H20 O4 | 228.13652 | 5.839 | 227.12924 | 0.381487776 | 0.001509249 | 1.177649276 | ↓ |
| 4-Thiouridine | C9 H12 N2 O5 S | 260.04714 | 4.821 | 259.04007 | 0.662565895 | 0.001523878 | 1.292105458 | ↓ |
| 13,14-dihydro-15-keto-PGD2 | C20 H32 O5 | 352.22512 | 7.325 | 351.21747 | 0.405458012 | 0.001591483 | 1.485262593 | ↓ |
| Modafinil acid | C15 H14 O3 S | 274.06294 | 5.207 | 273.05566 | 0.494409248 | 0.001640258 | 1.312084373 | ↓ |
| 2'-Deoxycytidine 5'-monophosphate (dCMP) | C9 H14 N3 O7 P | 307.05711 | 1.463 | 306.0499 | 0.20619544 | 0.001672197 | 1.251808978 | ↓ |
| lithocholic acid 3-sulfate sodium salt | C24 H38 O6 S Na2 | 500.21643 | 5.844 | 499.20938 | 0.59703146 | 0.001697928 | 1.374267577 | ↓ |
| Corticosterone | C21 H30 O4 | 346.21816 | 7.409 | 345.21085 | 0.341928846 | 0.001883255 | 1.360044449 | ↓ |
| N1-[4-(aminosulfonyl)phenyl]-2-[4-(tert-butyl)phenoxy]propanamide | C19 H24 N2 O4 S | 376.14817 | 1.46 | 375.14117 | 0.517579361 | 0.00198411 | 1.267071676 | ↓ |
| Stercobilin | C33 H46 N4 O6 | 594.33321 | 5.532 | 593.32635 | 0.243284999 | 0.001989165 | 1.290872469 | ↓ |
| (5-L-Glutamyl)-L-Amino Acid | C8 H14 N2 O5 | 218.09053 | 1.441 | 217.08328 | 0.59783888 | 0.002111682 | 1.129944553 | ↓ |
| S-(5-Adenosy)-L-Homocysteine | C14 H20 N6 O5 S | 384.12171 | 5.312 | 383.11441 | 0.507734554 | 0.00212427 | 1.281832926 | ↓ |
| LPA 4:0 | C7 H15 O7 P | 242.0565 | 5.236 | 241.04929 | 0.470350663 | 0.002279886 | 1.342540919 | ↓ |
| 2,3-Dinor-TXB2 | C18 H30 O6 | 342.20369 | 5.449 | 341.19705 | 0.39404751 | 0.002321451 | 1.086151612 | ↓ |
| Capric acid | C10 H20 O2 | 172.14685 | 7.476 | 171.13913 | 0.327721673 | 0.002364871 | 1.426962418 | ↓ |
| N1-cyclohexyl-4-(4-fluorobenzyl)-1,4-diazepane-1-carbothioamide | C19 H28 F N3 S | 349.20077 | 5.495 | 348.19345 | 0.594651417 | 0.002375745 | 1.203951048 | ↓ |
| L-Asparagine | C4 H8 N2 O3 | 132.05363 | 5.337 | 131.04642 | 0.397897953 | 0.002399941 | 1.22279082 | ↓ |
| Kinetin 9-riboside | C15 H17 N5 O5 | 347.12371 | 5.231 | 346.11664 | 0.394891112 | 0.002505017 | 1.261934994 | ↓ |
| Adenosine 5'-monophosphate | C10 H14 N5 O7 P | 347.06257 | 1.956 | 346.0553 | 0.284689851 | 0.00254304 | 1.068427751 | ↓ |
| Nonanoic acid | C9 H18 O2 | 158.13103 | 6.026 | 157.12373 | 0.58175625 | 0.002686279 | 1.401086221 | ↓ |
| LPE 17:2 | C22 H42 N O7 P | 463.27047 | 8.818 | 462.26294 | 0.243249134 | 0.002727361 | 1.29537188 | ↓ |
| Ellagic acid | C14 H6 O8 | 302.00666 | 5.593 | 300.99939 | 0.44210783 | 0.002747795 | 1.343866851 | ↓ |
| Cer-BDS (d17:0/16:0) | C33 H67 N O4 | 587.51313 | 10.918 | 586.50592 | 1.773700974 | 0.002775568 | 1.325983945 | ↑ |
| Prostaglandin K1 | C20 H32 O5 | 334.2148 | 7.446 | 333.20749 | 0.598463098 | 0.002775687 | 1.087519625 | ↓ |
| Estrone | C18 H22 O2 | 316.16786 | 5.89 | 315.16049 | 0.095171198 | 0.002849478 | 1.140256777 | ↓ |
| 2-(benzoylamino)-4,5-dimethoxybenzoic acid | C16 H15 N O5 | 301.09529 | 5.718 | 300.08792 | 0.411154019 | 0.002884386 | 1.237441309 | ↓ |
| Spiculisporic Acid | C17 H28 O6 | 328.18894 | 6.306 | 327.18152 | 0.374113166 | 0.002930584 | 1.53947278 | ↓ |
| N1-(4-chlorophenyl)-3-(1H-pyrrol-1-ylmethyl)piperidine-1-carboxamide | C17 H20 Cl N3 O | 317.12672 | 5.386 | 316.11978 | 0.322298762 | 0.00293129 | 1.249941088 | ↓ |
| N-Acetyl-DL-norvaline | C7 H13 N O3 | 159.08993 | 5.343 | 158.08258 | 0.432699431 | 0.002974462 | 1.408256976 | ↓ |
| Guanosine-3',5'-cyclic monophosphate | C10 H12 N5 O7 P | 345.04785 | 2.671 | 344.04062 | 0.202475284 | 0.002991454 | 1.363040977 | ↓ |
| LPA 22:5 | C25 H41 O7 P | 968.53122 | 6.573 | 483.25833 | 1.78974241 | 0.003057573 | 1.199932159 | ↑ |
| 2'-Deoxyinosine | C10 H12 N4 O4 | 252.08609 | 3.856 | 251.07875 | 0.443468156 | 0.003194486 | 1.127599226 | ↓ |
| 4-(acetylamino)phenyl 6-(trifluoromethyl)pyridine-2-carboxylate | C15 H11 F3 N2 O3 | 324.07486 | 5.592 | 323.06763 | 0.59559174 | 0.003206342 | 1.340904904 | ↓ |
| Deoxyribose 5-Phosphate | C5 H11 O7 P | 214.02459 | 1.4 | 213.01709 | 0.339509177 | 0.003246592 | 1.225860769 | ↓ |
| lipoamide | C8 H15 N O S2 | 205.05893 | 1.415 | 204.05176 | 1.658937529 | 0.003370774 | 1.575346403 | ↑ |
| 2-Methoxyestradiol (2-MeOE2) | C19 H26 O3 | 302.18843 | 6.898 | 301.18097 | 0.627605 | 0.003401773 | 1.318610795 | ↓ |
| dUMP | C9 H13 N2 O8 P | 308.0419 | 1.526 | 307.0351 | 0.464292755 | 0.003473529 | 1.054111096 | ↓ |
| LPS 15:0 | C21 H42 N O9 P | 483.2593 | 11.88 | 482.25223 | 0.564232693 | 0.003486685 | 1.270531214 | ↓ |
| Phosphopyruvic acid | C3 H5 O6 P | 167.98285 | 1.612 | 166.97552 | 0.390034613 | 0.003505814 | 1.244530378 | ↓ |
| methyl 2-[(2-acetyl-3-oxo-1-butenyl)amino]acetate | C9 H13 N O4 | 199.08494 | 5.032 | 198.07756 | 0.578089426 | 0.003551049 | 1.450867469 | ↓ |
| N-Acetylalanine | C5 H9 N O3 | 131.05855 | 2.734 | 130.05128 | 0.642796194 | 0.003669309 | 1.644532768 | ↓ |
| Nonadecanoic acid | C19 H38 O2 | 298.28767 | 10.98 | 297.2804 | 1.547444929 | 0.003778071 | 1.311191854 | ↑ |
| 2-(3,4-dimethoxyphenyl)ethanamine | C10 H15 N O2 | 181.1106 | 5.817 | 180.10333 | 0.410725603 | 0.003845444 | 1.297207057 | ↓ |
| 7,8-Dihydrofolate | C19 H21 N7 O6 | 443.15532 | 5.848 | 442.14734 | 0.550889188 | 0.003982392 | 1.281856494 | ↓ |
| 2-Hydroxy-1-(4-methoxyphenyl)propyl hexopyranoside | C16 H24 O8 | 344.14765 | 5.71 | 343.14008 | 0.590439495 | 0.004010368 | 1.16854633 | ↓ |
| LPS 18:1 | C24 H46 N O9 P | 523.29129 | 9.335 | 522.28406 | 0.365423156 | 0.004011188 | 1.239074011 | ↓ |
| Prostaglandin E3 | C20 H30 O5 | 386.18506 | 6.564 | 385.1777 | 0.64631004 | 0.004077709 | 1.063311735 | ↓ |
| LPE 16:2 | C21 H40 N O7 P | 449.25472 | 8.457 | 448.2475 | 0.398211733 | 0.004222243 | 1.079571864 | ↓ |
| 6-(4-phenylpiperazino)hexanoic acid hydrochloride | C16 H24 N2 O2 | 276.18419 | 5.854 | 275.17676 | 0.304889748 | 0.004234144 | 1.113186192 | ↓ |
| Uridine monophosphate (UMP) | C9 H13 N2 O9 P | 324.03614 | 1.493 | 323.0289 | 0.306313888 | 0.004265903 | 1.196103283 | ↓ |
| Isophorone | C9 H14 O | 138.10457 | 6.484 | 137.09755 | 0.392313392 | 0.004275295 | 1.085147343 | ↓ |
| 2-{[3-(3,4,5-trimethoxyphenyl)propanoyl]amino}acetic acid | C14 H19 N O6 | 594.2428 | 5.562 | 296.11423 | 0.206340224 | 0.004292358 | 1.202420103 | ↓ |
| N1-tetrahydrofuran-2-ylmethyl-2-cyanoacetamide | C8 H12 N2 O2 | 168.09019 | 3.983 | 167.08293 | 0.53763519 | 0.004317957 | 1.339577978 | ↓ |
| α-Cyclodextrin | C36 H60 O30 | 972.31877 | 4.838 | 971.31189 | 0.623503683 | 0.004404899 | 1.196790385 | ↓ |
| Salicylic acid | C7 H6 O3 | 138.03205 | 5.492 | 137.02472 | 0.59960614 | 0.004444789 | 1.082360683 | ↓ |
| PA (8:0/18:2) | C29 H53 O8 P | 560.33919 | 9.884 | 559.3316 | 0.313603379 | 0.004499626 | 1.300103192 | ↓ |
| 2-(2-carboxy-2-methylpropyl)-4,6-dimethylbenzoic acid | C14 H18 O4 | 250.12093 | 5.936 | 249.11359 | 0.267728358 | 0.004577898 | 1.246864362 | ↓ |
| Glycocholic acid | C26 H43 N O6 | 465.30886 | 6.812 | 464.30139 | 7.294036607 | 0.004888677 | 1.133646987 | ↑ |
| 2-Hydroxy-2-methyl-3-buten-1-yl beta-D-glucopyranoside | C11 H20 O7 | 310.12693 | 4.872 | 665.25177 | 0.229931722 | 0.004893845 | 1.401852609 | ↓ |
| N-Acetyl-L-glutamine | C7 H12 N2 O4 | 188.08012 | 1.761 | 187.07286 | 0.630965227 | 0.004976767 | 1.28618654 | ↓ |
| 3-(1,1,2,3,3,3-hexafluoropropyl)adamantane-1-carboxylic acid | C14 H16 F6 O2 | 330.11059 | 5.549 | 329.10321 | 0.39077769 | 0.005039099 | 1.137775796 | ↓ |
| Lithocholic Acid | C24 H40 O3 | 376.29781 | 8.859 | 375.29071 | 0.565333638 | 0.005097371 | 1.446342072 | ↓ |
| 6-Aminonicotinamide | C6 H7 N3 O | 137.05837 | 5.251 | 273.10947 | 0.458537253 | 0.005186922 | 1.645376496 | ↓ |
| FAHFA (20:3/22:5) | C42 H66 O4 | 634.49418 | 10.282 | 633.48627 | 3.231476599 | 0.005192198 | 1.354570893 | ↑ |
| Taurocholic acid | C26 H45 N O7 S | 515.29194 | 9.163 | 514.28467 | 7.577334992 | 0.00544939 | 1.125201215 | ↑ |
| Chenodeoxycholic acid-3-beta-D-glucuronide | C30 H48 O10 | 568.32256 | 5.355 | 567.31525 | 0.585174128 | 0.00559382 | 1.060456379 | ↓ |
| 6-chloro-2-methyl-4-[(2,3,4,5,6-pentamethylbenzyl)oxy]quinoline | C22 H24 Cl N O | 353.15941 | 4.816 | 352.15228 | 0.574458872 | 0.005745189 | 1.295232814 | ↓ |
| N-METHYL (-)EPHEDRINE | C11 H17 N O | 179.13136 | 5.872 | 178.12408 | 0.54496484 | 0.005760663 | 1.001449069 | ↓ |
| D-(-)-Ribose | C5 H10 O5 | 150.05309 | 1.446 | 149.04591 | 1.51253848 | 0.005769475 | 1.133467473 | ↑ |
| GW501516 | C21 H18 F3 N O3 S2 | 453.07008 | 1.852 | 498.0683 | 0.443829265 | 0.005773767 | 1.334939801 | ↓ |
| N1-(2-methyl-3-nitrophenyl)cyclohexane-1-carboxamide | C14 H18 N2 O3 | 131.06759 | 5.197 | 261.12808 | 0.36102464 | 0.005793567 | 1.022793521 | ↓ |
| L-Histidinol | C6 H11 N3 O | 141.09058 | 1.474 | 140.08328 | 0.5654978 | 0.00599418 | 1.17758418 | ↓ |
| 3-(4-chlorophenyl)-5-(3-phenyl-1H-pyrazol-4-yl)-1,2,4-oxadiazole | C17 H11 Cl N4 O | 223.1213 | 4.992 | 222.11401 | 0.091554609 | 0.006280639 | 1.153594873 | ↓ |
| Lysopc 17:0 | C25 H52 N O7 P | 509.34846 | 10.187 | 508.3414 | 0.232306351 | 0.006419409 | 1.450414061 | ↓ |
| Sinapyl aldehyde | C11 H12 O4 | 208.07396 | 5.993 | 207.06668 | 0.157016028 | 0.006640503 | 1.17337945 | ↓ |
| Hypoxanthine | C5 H4 N4 O | 136.03882 | 1.934 | 135.03149 | 0.602296461 | 0.006645 | 1.136336031 | ↓ |
| Galactonic acid | C6 H12 O7 | 196.05852 | 1.36 | 195.05119 | 2.470640557 | 0.006866564 | 1.028245132 | ↑ |
| (±)7(8)-DiHDPA | C22 H34 O4 | 362.24606 | 8.338 | 361.23798 | 0.659846491 | 0.007224036 | 1.24974166 | ↓ |
| tetranor-12(R)-HETE | C16 H26 O3 | 266.18845 | 6.568 | 265.18137 | 0.583774799 | 0.007294026 | 1.264150624 | ↓ |
| Glycochenodeoxycholic Acid (sodium salt) | C26 H43 N O5 | 449.31428 | 8.529 | 448.3071 | 6.216412647 | 0.007349738 | 1.257897606 | ↑ |
| Guanosine | C10 H13 N5 O5 | 283.09173 | 2.425 | 282.08435 | 0.649339579 | 0.007556237 | 1.007127745 | ↓ |
| Sinapic acid | C11 H12 O5 | 224.06895 | 5.342 | 223.06172 | 0.608370703 | 0.00783953 | 1.095375065 | ↓ |
| DL-3,4-Dihydroxyphenyl glycol | C8 H10 O4 | 170.05766 | 5.644 | 385.11353 | 0.497242066 | 0.008129983 | 1.021282178 | ↓ |
| 4-(beta-D-Glucopyranosyloxy)-2-methylenebutanoic acid | C11 H18 O8 | 278.10082 | 5.106 | 277.09384 | 0.612495746 | 0.008230659 | 1.370292873 | ↓ |
| N6-Acetyl-L-Lysine | C8 H16 N2 O3 | 188.11654 | 1.466 | 187.10931 | 0.6303942 | 0.008464514 | 1.297050185 | ↓ |
| 19(R)-hydroxy Prostaglandin A2 | C20 H30 O5 | 332.19911 | 6.694 | 331.19186 | 0.574425276 | 0.00856128 | 1.257102891 | ↓ |
| L-Adrenaline | C9 H13 N O3 | 183.08982 | 5.593 | 182.08252 | 0.645422828 | 0.008921605 | 1.178693618 | ↓ |
| 2,8-Quinolinediol | C9 H7 N O2 | 161.04799 | 4.593 | 160.04071 | 0.295026591 | 0.009374016 | 1.012829006 | ↓ |
| mephedrone-d3 | C11 H12 [2]H3 N O | 179.95662 | 1.218 | 178.94937 | 0.621164531 | 0.009740515 | 1.109972733 | ↓ |
| Lysopc 20:0 | C28 H58 N O7 P | 551.39383 | 8.973 | 550.38641 | 0.467738365 | 0.009741845 | 1.318160173 | ↓ |
| LPE 20:3 | C25 H46 N O7 P | 503.30123 | 9.258 | 502.29367 | 0.515245947 | 0.009973073 | 1.098533933 | ↓ |
| 10-Hydroxydecanoic acid | C10 H20 O3 | 188.14161 | 6.161 | 187.13429 | 0.406207725 | 0.010501529 | 1.004561343 | ↓ |
| Thymidine 5'-monophosphate | C10 H15 N2 O8 P | 322.05687 | 2.514 | 321.04959 | 0.088425096 | 0.011410649 | 1.033204052 | ↓ |
| 1-(4-Methoxyphenyl)-2-propanone | C10 H12 O2 | 164.08412 | 5.688 | 209.08229 | 0.58005247 | 0.012264047 | 1.145901447 | ↓ |
| 2-Hydroxymyristic acid | C14 H28 O3 | 198.19866 | 8.603 | 197.19119 | 0.424622512 | 0.012411114 | 1.267214962 | ↓ |
| 4-Phenylbutyric acid | C10 H12 O2 | 164.08412 | 5.885 | 163.07683 | 0.621231764 | 0.012417784 | 1.280700722 | ↓ |
| DL-methionine sulfoxide | C5 H11 N O3 S | 165.04636 | 1.363 | 164.03903 | 2.04377106 | 0.01278833 | 1.176313623 | ↑ |
| LysoPE 18:2 | C23 H44 N O7 P | 477.28575 | 6.535 | 476.27829 | 0.602930975 | 0.013221873 | 1.031974077 | ↓ |
| 4-Pyridoxic acid | C8 H9 N O4 | 183.0535 | 3.586 | 182.04616 | 0.570755612 | 0.013259834 | 1.091452656 | ↓ |
| 11-Deoxy prostaglandin F2β | C20 H34 O4 | 180.11375 | 5.455 | 359.22021 | 0.512409507 | 0.01347806 | 1.14266551 | ↓ |
| 2,3-dinor Prostaglandin E1 | C18 H30 O5 | 362.18825 | 9.109 | 361.18097 | 0.160715725 | 0.013816331 | 1.137252755 | ↓ |
| α-D-Glucose-1,6-bisphosphate | C6 H14 O12 P2 | 339.99647 | 1.411 | 338.9892 | 0.275067909 | 0.013951294 | 1.388833302 | ↓ |
| 17(S)-HpDHA | C22 H32 O4 | 360.23064 | 7.423 | 359.22342 | 0.516742175 | 0.014656765 | 1.029847224 | ↓ |
| 4,6-dimethyl-2-(methylamino)-5-nitronicotinonitrile | C9 H10 N4 O2 | 206.0793 | 5.431 | 205.07196 | 39.42825671 | 0.014676314 | 1.882972978 | ↑ |
| N-(1-benzothiophen-3-yl)-N'-(1-benzyl-4-piperidinyl)urea | C21 H23 N3 O S | 365.15959 | 5.163 | 364.15237 | 0.622182734 | 0.014687343 | 1.126698159 | ↓ |
| (±)11(12)-EET | C20 H32 O3 | 320.23531 | 8.41 | 319.22797 | 0.537491692 | 0.015041465 | 1.261771333 | ↓ |
| 4-Hydroxybenzylalcohol | C7 H8 O2 | 124.05275 | 5.568 | 123.04546 | 0.293275633 | 0.015107602 | 1.149744164 | ↓ |
| gamma-Glutamyltyrosine | C14 H18 N2 O6 | 310.11707 | 4.98 | 309.10983 | 0.589547567 | 0.015150621 | 1.069026495 | ↓ |
| Malonic acid | C3 H4 O4 | 104.0112 | 1.576 | 103.00391 | 6.789138253 | 0.015184499 | 1.101922367 | ↑ |
| (1R,3R,4R,5R)-(-)-Quinic acid | C7 H12 O6 | 192.06374 | 5.263 | 191.05644 | 2.921853895 | 0.015735842 | 1.104121065 | ↑ |
| Chenodeoxycholic Acid | C24 H40 O4 | 438.29813 | 7.97 | 437.29092 | 0.66098742 | 0.016082938 | 1.479479061 | ↓ |
| methyl 2-cyano-2-[2-nitro-4-(trifluoromethyl)phenyl]acetate | C11 H7 F3 N2 O4 | 288.04175 | 5.197 | 287.03442 | 4.030754662 | 0.016087447 | 1.628932132 | ↑ |
| α-D-Mannose 1-phosphate | C6 H13 O9 P | 260.02989 | 1.317 | 259.02261 | 0.209432598 | 0.016364817 | 1.191994988 | ↓ |
| 4-Ethylphenol | C8 H10 O | 122.07337 | 5.623 | 121.06606 | 0.62250991 | 0.016409414 | 1.005198052 | ↓ |
| 23-Nordeoxycholic acid | C23 H38 O4 | 378.27729 | 6.573 | 377.27042 | 2.702238221 | 0.016425561 | 1.103045852 | ↑ |
| L-Homocystine | C8 H16 N2 O4 S2 | 268.05473 | 1.732 | 267.04745 | 0.622160162 | 0.016429955 | 1.075603431 | ↓ |
| 3b,7b-Dihydroxy-5-androsten-17-one | C19 H28 O3 | 304.2042 | 5.994 | 303.19693 | 3.13210638 | 0.017278231 | 1.228442221 | ↑ |
| Propionyl-L-carnitine | C10 H19 N O4 | 217.13187 | 5.263 | 216.12444 | 0.622195842 | 0.017441724 | 1.234775226 | ↓ |
| L-beta-Imidazolelactic acid | C6 H8 N2 O3 | 156.05389 | 2.255 | 155.04662 | 0.430558921 | 0.017686913 | 1.000043635 | ↓ |
| Xanthosine | C10 H12 N4 O6 | 284.0759 | 3.549 | 283.06854 | 0.485892674 | 0.017956027 | 1.070438626 | ↓ |
| 4-Hydroxy-2-Oxoglutaric Acid | C5 H6 O6 | 162.01686 | 1.53 | 161.00963 | 4.686930117 | 0.018475273 | 1.050265309 | ↑ |
| DL-Norvaline | C5 H11 N O2 | 117.07928 | 5.364 | 116.07203 | 0.607326097 | 0.018694729 | 1.321998634 | ↓ |
| 2-Propylglutaric acid | C8 H14 O4 | 174.0895 | 5.896 | 173.08229 | 0.588996181 | 0.019050698 | 1.024564652 | ↓ |
| 3-(3-nitrophenyl)-2-phenylacrylic acid | C15 H11 N O4 | 290.04655 | 5.294 | 289.03925 | 0.267920152 | 0.019436924 | 1.308511341 | ↓ |
| DGDG (16:3/18:3) | C49 H80 O15 | 954.55623 | 11.578 | 953.54895 | 1.552326314 | 0.020472727 | 1.090958859 | ↑ |
| Glutaric acid | C5 H8 O4 | 132.04255 | 4.366 | 131.03514 | 0.5714663 | 0.022975136 | 1.251979704 | ↓ |
| 9-KODE | C18 H30 O3 | 294.21829 | 6 | 293.21231 | 0.601034248 | 0.023079309 | 1.010651806 | ↓ |
| Methyl beta-D-galactopyranoside | C7 H14 O6 | 194.07935 | 1.656 | 193.0721 | 1.645720585 | 0.024226095 | 1.004481152 | ↑ |
| L(-)-Fucose | C6 H12 O5 | 164.06893 | 1.692 | 163.06168 | 2.049644207 | 0.024257684 | 1.11668748 | ↑ |
| L-Anserine | C10 H16 N4 O3 | 240.12277 | 1.312 | 239.11546 | 0.660010893 | 0.024298207 | 1.06082424 | ↓ |
| ethyl 1-cyclohexyl-4,5-dioxopyrrolidine-3-carboxylate | C13 H19 N O4 | 253.13191 | 5.723 | 252.12459 | 0.624733638 | 0.025516708 | 1.055974374 | ↓ |
| Protoporphyrin IX | C34 H34 N4 O4 | 562.25867 | 9.955 | 561.25134 | 1.911998638 | 0.02605262 | 1.341028926 | ↑ |
| 1,2,3-cyclopropanetricarboxylic acid | C6 H6 O6 | 174.0168 | 1.561 | 173.00943 | 2.853012025 | 0.026786568 | 1.011186461 | ↑ |
| Methyl-beta-galactopyranoside | C7 H14 O6 | 194.07933 | 1.473 | 175.06151 | 4.439279171 | 0.027389446 | 1.031963778 | ↑ |
| Adipic acid | C6 H10 O4 | 146.05831 | 5.315 | 145.05096 | 0.391526775 | 0.029046596 | 1.410565127 | ↓ |
| 3,8,9-trihydroxy-10-propyl-3,4,5,8,9,10-hexahydro-2H-oxecin-2-one | C12 H20 O5 | 244.1314 | 5.716 | 243.12416 | 0.639216523 | 0.030482472 | 1.067681149 | ↓ |
| 3,5-Dihydroxybenzoic acid | C7 H6 O4 | 154.02444 | 4.408 | 199.02266 | 0.633042084 | 0.03194793 | 1.306215583 | ↓ |
| LPS 14:0 | C20 H40 N O9 P | 469.24922 | 11.257 | 468.24194 | 0.444803566 | 0.03328322 | 1.15390556 | ↓ |
| Glycodeoxycholic Acid (hydrate) | C26 H43 N O5 | 449.31454 | 7.454 | 448.30722 | 0.440476845 | 0.034384009 | 1.066446802 | ↓ |
| Chrysin | C15 H10 O4 | 254.05823 | 6.627 | 253.05092 | 4.962178599 | 0.034535368 | 1.142207348 | ↑ |
| Salvinorin B | C21 H26 O7 | 390.17128 | 10.54 | 389.16394 | 1.659337447 | 0.037379549 | 1.005789633 | ↑ |
| N-(3,4-dimethoxyphenethyl)-N'-(3,4,5-trimethoxybenzoyl)thiourea | C21 H26 N2 O6 S | 434.1582 | 5.708 | 433.15088 | 8.068924176 | 0.043187292 | 1.267723801 | ↑ |
| FAHFA (2:0/16:0) | C18 H34 O4 | 314.24591 | 10.212 | 313.23871 | 0.354201923 | 0.043746928 | 1.048758211 | ↓ |
| 12-Hydroxydodecanoic acid | C12 H24 O3 | 170.16725 | 7.103 | 169.16005 | 0.653023846 | 0.04587098 | 1.047502405 | ↓ |
| LPS 15:1 | C21 H40 N O9 P | 481.24442 | 10.551 | 480.23715 | 0.227377924 | 0.047142793 | 1.445155966 | ↓ |
| Hesperetin | C16 H14 O6 | 302.07869 | 6.141 | 303.08603 | 9.082413502 | 3.78E-11 | 2.777474185 | ↑ |
| 17alpha-Ethinyl estradiol | C20 H24 O2 | 296.17756 | 8.422 | 297.18466 | 50.94275592 | 1.72E-10 | 2.685951022 | ↑ |
| Isobutyl benzoate | C11 H14 O2 | 178.09929 | 8.456 | 179.10672 | 11.19250796 | 4.91E-09 | 2.514274166 | ↑ |
| (+/-)-Equol | C15 H14 O3 | 242.09413 | 6.095 | 243.10165 | 7.345872871 | 3.06E-08 | 2.361753291 | ↑ |
| Biochanin A | C16 H12 O5 | 284.06811 | 6.17 | 285.07553 | 4.356887444 | 4.13E-08 | 2.199625906 | ↑ |
| Purpurin | C14 H8 O5 | 256.03417 | 6.136 | 257.04144 | 8.38454841 | 6.03E-08 | 2.449510457 | ↑ |
| 4-Methoxycinnamaldehyde | C10 H10 O2 | 162.06797 | 6.745 | 163.07509 | 0.422845632 | 1.02E-07 | 2.108645094 | ↓ |
| Coenzyme Q1 | C14 H18 O4 | 250.12011 | 6.112 | 251.12766 | 2.853599013 | 1.42E-07 | 2.242690951 | ↑ |
| ACar 22:3 | C29 H52 N O4 | 477.38024 | 6.173 | 478.38751 | 6.021533772 | 1.72E-07 | 2.336068588 | ↑ |
| 4',7-Dihydroxyflavanone | C15 H12 O4 | 239.04662 | 6.077 | 240.05437 | 3.813028211 | 1.72E-07 | 2.215362161 | ↑ |
| dAMP | C10 H14 N5 O6 P | 331.06859 | 6.168 | 332.07587 | 5.469859577 | 1.83E-07 | 2.323011412 | ↑ |
| PC (14:0e/2:0) | C24 H50 N O7 P | 495.32906 | 6.158 | 496.3367 | 5.859858342 | 2.10E-07 | 2.322197226 | ↑ |
| Narasin | C43 H72 O11 | 781.5311 | 6.107 | 782.53821 | 6.911992647 | 3.02E-07 | 2.328716615 | ↑ |
| (1R,2R)-trans-N-Boc-1,2-cyclohexanediamine | C11 H22 N2 O2 | 214.16803 | 4.756 | 215.17529 | 194.8162691 | 4.20E-07 | 2.425291268 | ↑ |
| 5-Hydroxymethyl-2-furancarboxylic acid | C6 H6 O4 | 142.02629 | 6.132 | 143.03352 | 3.405973411 | 5.04E-07 | 2.387154195 | ↑ |
| Myristicin | C11 H12 O3 | 192.08118 | 6.216 | 193.08846 | 3.320236593 | 6.08E-07 | 2.034123687 | ↑ |
| Diosmetin | C16 H12 O6 | 300.06499 | 6.092 | 301.07227 | 2.217880904 | 1.11E-06 | 2.014207761 | ↑ |
| PC (6:0/7:0) | C21 H42 N O8 P | 467.27024 | 8.512 | 468.27841 | 5.675172238 | 1.14E-06 | 2.080829435 | ↑ |
| Withanolide A | C28 H38 O6 | 470.26541 | 6.925 | 471.27292 | 0.466773848 | 1.28E-06 | 1.985461602 | ↓ |
| Magnolol | C18 H18 O2 | 266.12602 | 6.116 | 267.13324 | 5.258818166 | 1.34E-06 | 2.173990563 | ↑ |
| Citrinin | C13 H14 O5 | 272.06821 | 6.099 | 273.07568 | 2.60947553 | 3.70E-06 | 1.93830456 | ↑ |
| Prostaglandin B2 | C20 H30 O4 | 334.21385 | 6.115 | 335.22153 | 2.382595086 | 3.84E-06 | 2.027522368 | ↑ |
| 9-Aminoacridine | C13 H10 N2 | 194.08432 | 6.231 | 195.0916 | 6.849981259 | 4.33E-06 | 2.070265897 | ↑ |
| ACar 20:6 | C27 H42 N O4 | 443.30306 | 6.152 | 444.31018 | 3.354639234 | 5.95E-06 | 2.021817548 | ↑ |
| Obacunoic acid | C26 H32 O8 | 472.20934 | 6.222 | 473.2171 | 3.757020503 | 8.61E-06 | 2.266242451 | ↑ |
| 3,4-Dimethylbenzoic acid | C9 H10 O2 | 150.068 | 8.562 | 151.07521 | 5.555581124 | 9.20E-06 | 1.818002326 | ↑ |
| 3-Methoxy prostaglandin F1α | C21 H38 O6 | 368.25734 | 7.617 | 369.26514 | 0.547687148 | 9.29E-06 | 1.61786079 | ↓ |
| alpha-Farnesene | C15 H24 | 204.18781 | 6.92 | 205.1951 | 0.342746331 | 1.08E-05 | 1.823426382 | ↓ |
| ACar 11:0 | C18 H36 N O4 | 329.25643 | 6.083 | 330.26379 | 4.361544841 | 1.10E-05 | 1.965035441 | ↑ |
| L-Thyroxine | C15 H11 I4 N O4 | 776.68651 | 6.207 | 777.69379 | 4.758513012 | 1.14E-05 | 1.945630124 | ↑ |
| Sulfamethazine | C12 H14 N4 O2 S | 278.08147 | 6.227 | 279.08875 | 2.520466943 | 1.18E-05 | 1.905180119 | ↑ |
| N-Acetylanthranilic acid | C9 H9 N O3 | 197.06864 | 6.203 | 198.07568 | 2.37617716 | 1.44E-05 | 2.035331229 | ↑ |
| 10-Undecenoic acid | C11 H20 O2 | 184.147 | 7.36 | 391.28323 | 0.28969161 | 1.87E-05 | 1.735565947 | ↓ |
| 3',4'-Dihydroxyphenylacetone | C9 H10 O3 | 166.0627 | 6.199 | 167.06998 | 3.095568484 | 2.76E-05 | 2.082925476 | ↑ |
| L-arginine | C6 H14 N4 O2 | 174.11198 | 4.846 | 175.11923 | 0.438568955 | 3.05E-05 | 1.960592557 | ↓ |
| Artemisinin | C15 H22 O5 | 130.08206 | 6.187 | 131.0896 | 2.465967507 | 3.13E-05 | 1.894479328 | ↑ |
| Apigenin | C15 H10 O5 | 270.05415 | 6.093 | 271.06143 | 1.716238237 | 3.20E-05 | 1.809924707 | ↑ |
| Acetophenone | C8 H8 O | 120.05756 | 8.045 | 103.05432 | 0.547942831 | 3.57E-05 | 1.767527433 | ↓ |
| Pyridoxamine | C8 H12 N2 O2 | 168.09004 | 1.336 | 169.09746 | 0.505856046 | 4.01E-05 | 1.582285277 | ↓ |
| Fludrocortisone acetate | C23 H31 F O6 | 422.2071 | 6.166 | 423.2149 | 4.467125725 | 4.08E-05 | 1.839240009 | ↑ |
| Coumestrol | C15 H8 O5 | 268.03687 | 6.148 | 269.04361 | 2.256539533 | 4.82E-05 | 1.815121987 | ↑ |
| Licochalcone A | C21 H22 O4 | 338.15151 | 6.815 | 339.15848 | 11.65441268 | 5.01E-05 | 2.121553804 | ↑ |
| 18-β-Glycyrrhetinic acid | C30 H46 O4 | 470.33919 | 8.485 | 471.34634 | 55.64164774 | 5.27E-05 | 1.935727581 | ↑ |
| 2,6-Di-tert-butyl-1,4-benzoquinone | C14 H20 O2 | 220.14769 | 6.182 | 221.15497 | 2.127782459 | 5.41E-05 | 1.820271515 | ↑ |
| L-5-Hydroxytryptophan | C11 H12 N2 O3 | 220.08457 | 5.091 | 221.09183 | 0.392323961 | 6.16E-05 | 1.84301933 | ↓ |
| Eicosapentaenoic acid | C20 H30 O2 | 302.22428 | 7.287 | 303.23166 | 0.101267359 | 6.26E-05 | 1.682418469 | ↓ |
| cis-Resveratrol | C14 H12 O3 | 228.0785 | 6.247 | 229.08568 | 1.982424 | 6.79E-05 | 1.701011926 | ↑ |
| Histidine | C6 H9 N3 O2 | 155.07299 | 4.859 | 156.08022 | 0.644379752 | 8.14E-05 | 1.563093234 | ↓ |
| D-Gluconic acid | C6 H12 O7 | 196.05818 | 1.363 | 179.05481 | 1.719084324 | 9.36E-05 | 1.437429192 | ↑ |
| 5-fluoro AB-PINACA N-(4-hydroxypentyl) metabolite | C18 H25 F N4 O3 | 386.17262 | 7.096 | 387.1799 | 2.709251302 | 0.00011261 | 1.740894795 | ↑ |
| (9cis)-Retinal | C20 H28 O | 284.2137 | 6.094 | 285.22134 | 2.816513709 | 0.000126833 | 1.747238393 | ↑ |
| Safrole | C10 H10 O2 | 162.0679 | 8.023 | 163.07501 | 0.5732685 | 0.000134388 | 1.782681705 | ↓ |
| 3-Acetyl-2,5-dimethylfuran | C8 H10 O2 | 138.0678 | 6.413 | 121.06451 | 0.617538991 | 0.000147787 | 1.572713482 | ↓ |
| Melatonin | C13 H16 N2 O2 | 232.1209 | 6.567 | 233.12816 | 0.357036553 | 0.000156014 | 1.635109046 | ↓ |
| 5,6-Dihydrouracil | C4 H6 N2 O2 | 114.0429 | 1.751 | 115.05016 | 0.490072342 | 0.000165244 | 1.649519446 | ↓ |
| Pregnenolone | C21 H32 O2 | 316.23991 | 7.669 | 317.24707 | 0.416617399 | 0.000201081 | 1.550978709 | ↓ |
| 2,6-Dihydroxybenzoic acid | C7 H6 O4 | 154.02644 | 1.451 | 155.03363 | 2.176566353 | 0.000218962 | 1.746876534 | ↑ |
| Coenzyme Q2 | C19 H26 O4 | 318.18305 | 7.61 | 319.19034 | 0.550172209 | 0.000235719 | 1.686158272 | ↓ |
| (+/-)12(13)-DiHOME | C18 H34 O4 | 296.23483 | 6.521 | 297.24197 | 0.325465409 | 0.000236234 | 1.332966594 | ↓ |
| 11-Deoxy prostaglandin F1α | C20 H36 O4 | 362.24418 | 6.849 | 363.25113 | 0.549559532 | 0.000290404 | 1.589194467 | ↓ |
| 4-Hydroxymandelonitrile | C8 H7 N O2 | 149.0477 | 5.048 | 150.05495 | 0.578266486 | 0.000301547 | 1.394713641 | ↓ |
| Wogonin | C16 H12 O5 | 284.06776 | 6.53 | 285.07483 | 6.235415269 | 0.000305002 | 1.670698746 | ↑ |
| Norbuprenorphine | C25 H35 N O4 | 413.26189 | 6.886 | 414.26938 | 0.358121743 | 0.000329033 | 1.538350895 | ↓ |
| Limonin | C26 H30 O8 | 452.18158 | 7.024 | 453.18985 | 18.00008563 | 0.000358609 | 1.67228851 | ↑ |
| 11(Z),14(Z),17(Z)-Eicosatrienoic acid | C20 H34 O2 | 306.25583 | 6.886 | 307.26303 | 0.419516502 | 0.000360818 | 1.518360685 | ↓ |
| 20-Carboxy-Leukotriene B4 | C20 H30 O6 | 366.20323 | 7.112 | 367.21051 | 3.208227301 | 0.00040053 | 1.877759279 | ↑ |
| (S)-Equol | C15 H14 O3 | 242.09436 | 1.339 | 243.10164 | 1.854721843 | 0.000422659 | 1.620447571 | ↑ |
| Norfloxacin | C16 H18 F N3 O3 | 319.13776 | 1.402 | 320.14508 | 0.522616959 | 0.000423601 | 1.515840756 | ↓ |
| 4-Ethoxybenzaldehyde | C9 H10 O2 | 150.06896 | 6.174 | 151.07623 | 1.951278146 | 0.000429956 | 1.468353826 | ↑ |
| 6??-Hydroxytestosterone | C19 H28 O3 | 304.20343 | 7.667 | 305.21033 | 0.609037304 | 0.000444102 | 1.371623476 | ↓ |
| 5α-Dihydrotestosterone | C19 H30 O2 | 290.22427 | 8.062 | 291.23196 | 0.583294659 | 0.000448115 | 1.542430709 | ↓ |
| D-Carnitine | C7 H15 N O3 | 161.10505 | 6.546 | 162.11205 | 2.218621156 | 0.000479956 | 1.279692054 | ↑ |
| Quinine | C20 H24 N2 O2 | 324.17763 | 6.212 | 325.18491 | 1.727517232 | 0.000495667 | 1.513576581 | ↑ |
| Monoolein | C21 H40 O4 | 356.29223 | 9.842 | 357.29922 | 0.077295049 | 0.000510111 | 1.498753481 | ↓ |
| Lysopc 18:2 | C26 H50 N O7 P | 519.33251 | 7.256 | 520.3399 | 0.580801266 | 0.000522604 | 1.416668995 | ↓ |
| Threitol | C4 H10 O4 | 122.04794 | 1.426 | 123.0552 | 2.424313566 | 0.000585511 | 1.711557168 | ↑ |
| Coniferin | C16 H22 O8 | 364.11175 | 1.366 | 347.10864 | 1.848836076 | 0.000708945 | 1.410859551 | ↑ |
| Isotretinoin | C20 H28 O2 | 300.20847 | 8.03 | 301.21512 | 0.588967705 | 0.000789819 | 1.494124838 | ↓ |
| 3-Ureidopropionic acid | C4 H8 N2 O3 | 132.0535 | 1.742 | 115.05014 | 0.605637396 | 0.000869057 | 1.475121944 | ↓ |
| Ascorbyl palmitate | C22 H38 O7 | 431.28791 | 5.485 | 432.29538 | 5.139998574 | 0.000884839 | 1.623013348 | ↑ |
| Milbemycin A4 oxime | C32 H45 N O7 | 537.31267 | 10.464 | 538.31995 | 2.452490459 | 0.001062366 | 1.370370056 | ↑ |
| Dihydrocapsaicin | C18 H29 N O3 | 307.2147 | 6.967 | 308.22192 | 0.208560621 | 0.001082262 | 1.512975082 | ↓ |
| Kahweol | C20 H26 O3 | 314.18781 | 7.077 | 315.19482 | 1.54305263 | 0.001085932 | 1.340011254 | ↑ |
| N8-Acetylspermidine | C9 H21 N3 O | 187.1685 | 1.312 | 188.17569 | 0.45922838 | 0.001102777 | 1.330636716 | ↓ |
| 19(R)-HETE | C20 H32 O3 | 302.22418 | 6.943 | 303.23129 | 0.315057227 | 0.001133401 | 1.370618777 | ↓ |
| 1-Aminocyclohexanecarboxylic acid | C7 H13 N O2 | 143.09472 | 2.655 | 144.10205 | 0.513531555 | 0.001153979 | 1.185608594 | ↓ |
| Lysopg 18:1 | C24 H47 O9 P | 510.29783 | 8.009 | 511.30527 | 0.532913782 | 0.001176026 | 1.498973717 | ↓ |
| Nicotinuric acid | C8 H8 N2 O3 | 180.05342 | 2.137 | 181.0607 | 9.508956846 | 0.00124345 | 1.641674761 | ↑ |
| Biliverdin | C33 H34 N4 O6 | 582.24714 | 6.207 | 583.25488 | 2.279702114 | 0.001336142 | 1.356220098 | ↑ |
| Cytidine 5'-Monophosphate-N-Acetylneuraminic Acid | C20 H30 N4 Na O16 P | 636.13091 | 5.804 | 637.13818 | 3.82253621 | 0.001347723 | 1.564248222 | ↑ |
| Lysopa 16:0 | C19 H39 O7 P | 410.24258 | 6.969 | 411.24954 | 0.622666992 | 0.001485493 | 1.36984254 | ↓ |
| Glycolithocholic acid | C26 H43 N O4 | 433.31932 | 6.606 | 434.32672 | 0.598474019 | 0.001517696 | 1.268007245 | ↓ |
| L-Alanyl-L-Lysine | C9 H19 N3 O3 | 217.14268 | 1.426 | 218.15018 | 0.524960339 | 0.00153139 | 1.350049203 | ↓ |
| Progesterone | C21 H30 O2 | 314.22424 | 7.198 | 315.23175 | 0.421376127 | 0.001549009 | 1.37566488 | ↓ |
| Adenine | C5 H5 N5 | 135.05447 | 1.522 | 136.06171 | 0.60833928 | 0.001583729 | 1.256939787 | ↓ |
| Dithranol | C14 H10 O3 | 226.06306 | 5.393 | 227.07037 | 2.076772008 | 0.001621635 | 1.551298373 | ↑ |
| 1-Oleoyl-Sn-Glycero-3-Phosphocholine | C26 H52 N O7 P | 521.35045 | 8.147 | 522.35699 | 0.381045971 | 0.001656192 | 1.42197594 | ↓ |
| Oxymorphone | C17 H19 N O4 | 301.12717 | 1.415 | 302.13434 | 0.584206975 | 0.001960372 | 1.3164967 | ↓ |
| Nandrolone | C18 H26 O2 | 274.19298 | 8.042 | 275.20071 | 0.631847313 | 0.002015876 | 1.41447248 | ↓ |
| Cholecalciferol | C27 H44 O | 384.34011 | 8.15 | 385.34717 | 1.707612856 | 0.002030079 | 1.753068235 | ↑ |
| N epsilon,N epsilon,N epsilon-trimethyllysine | C9 H20 N2 O2 | 188.15251 | 3.536 | 189.15979 | 0.150513327 | 0.002092448 | 1.076383112 | ↓ |
| Neosaxitoxin | C10 H17 N7 O5 | 297.1212 | 5.083 | 298.12872 | 0.651689414 | 0.002391024 | 1.312278693 | ↓ |
| L-2,4-Diaminobutyric acid | C4 H10 N2 O2 | 118.07618 | 1.934 | 119.08349 | 0.477489417 | 0.002432352 | 1.323655109 | ↓ |
| 4-Guanidinobutyric acid | C5 H11 N3 O2 | 145.08506 | 1.448 | 146.09203 | 4.602446031 | 0.002566549 | 1.478931775 | ↑ |
| Menaquinone | C31 H40 O2 | 444.30178 | 6.832 | 445.30841 | 10.56344965 | 0.002595209 | 1.342132174 | ↑ |
| Nicotinic acid mononucleotide | C11 H14 N O9 P | 335.0406 | 1.459 | 336.04742 | 0.231600557 | 0.002816785 | 1.296138089 | ↓ |
| α-Aspartylphenylalanine | C13 H16 N2 O5 | 280.10581 | 4.826 | 281.11282 | 0.516804093 | 0.002827784 | 1.222443829 | ↓ |
| Pyrrole-2-carboxylic acid | C5 H5 N O2 | 111.03209 | 1.374 | 129.06596 | 10.39782104 | 0.002844563 | 1.432487053 | ↑ |
| Arachidonic acid methyl ester | C21 H34 O2 | 318.2562 | 7.178 | 319.26364 | 0.626788898 | 0.002872262 | 1.237813438 | ↓ |
| 4-Methoxybenzaldehyde | C8 H8 O2 | 136.05234 | 7.002 | 137.05975 | 0.445763694 | 0.00298609 | 1.289294608 | ↓ |
| N-Acetyl-S-allyl-L-cysteine | C8 H13 N O3 S | 203.06115 | 5.562 | 204.06839 | 0.653589796 | 0.003024588 | 1.058219277 | ↓ |
| Desoxycortone | C21 H30 O3 | 330.21851 | 8.48 | 331.22583 | 2.154004192 | 0.003599093 | 1.248070407 | ↑ |
| ACar 14:3 | C21 H36 N O4 | 365.25638 | 6.247 | 366.26376 | 2.278296771 | 0.003610711 | 1.450159961 | ↑ |
| N1-Acetylspermine | C12 H28 N4 O | 122.11321 | 1.291 | 123.12048 | 0.38861432 | 0.003825468 | 1.27072791 | ↓ |
| Dihydrothymine | C5 H8 N2 O2 | 128.05853 | 3.1 | 129.06592 | 0.328906072 | 0.004042075 | 1.332326699 | ↓ |
| Phosphocholine | C5 H15 Cl N O4 P | 219.04254 | 1.152 | 220.05003 | 0.608737391 | 0.004478056 | 1.335739383 | ↓ |
| allantoate | C4 H8 N4 O4 | 176.05459 | 1.375 | 177.0618 | 3.986669028 | 0.004710465 | 1.349791676 | ↑ |
| ACar 20:3 | C27 H48 N O4 | 449.34975 | 7.124 | 450.35672 | 3.109042597 | 0.0048068 | 1.276118744 | ↑ |
| Diisobutylphthalate | C16 H22 O4 | 278.14995 | 6.721 | 279.15723 | 0.578406726 | 0.005339665 | 1.178058501 | ↓ |
| 5-Hydroxyindole-3-acetic acid | C10 H9 N O3 | 191.05797 | 5.182 | 192.06514 | 0.581370807 | 0.00539508 | 1.306153499 | ↓ |
| cAMP | C10 H12 N5 O6 P | 329.05328 | 6.884 | 330.06064 | 0.441345105 | 0.005558391 | 1.124709805 | ↓ |
| (3-Methoxy-4-hydroxyphenyl)ethylene glycol sulfate | C9 H12 O7 S | 264.0302 | 1.457 | 265.03745 | 2.519963611 | 0.005839573 | 1.252738781 | ↑ |
| Vitamin A | C20 H30 O | 286.22926 | 7.251 | 287.23639 | 0.613146746 | 0.006716404 | 1.352537505 | ↓ |
| D-(+)-Maltose | C12 H22 O11 | 364.09794 | 1.365 | 365.10486 | 2.157428058 | 0.006991091 | 1.15826935 | ↑ |
| 2-Phenylglycine | C8 H9 N O2 | 151.06315 | 4.955 | 152.07037 | 0.336220102 | 0.007031935 | 1.156017788 | ↓ |
| N-Methylphenylalanine | C10 H13 N O2 | 179.09441 | 4.998 | 180.10175 | 0.410123655 | 0.007279893 | 1.120702752 | ↓ |
| 5-Phenylvaleric Acid | C11 H14 O2 | 178.09922 | 6.548 | 179.10625 | 1.776731959 | 0.007604902 | 1.207722745 | ↑ |
| ACar 16:4 | C23 H38 N O4 | 369.28983 | 6.48 | 392.27905 | 4.731779379 | 0.007630846 | 1.155219806 | ↑ |
| 3-Hydroxyproline | C5 H9 N O3 | 131.05823 | 5.069 | 132.06555 | 0.381585636 | 0.007792474 | 1.175251553 | ↓ |
| D-Glucosamine 6-phosphate | C6 H14 N O8 P | 259.04579 | 1.386 | 260.05283 | 0.636364763 | 0.008285283 | 1.104592428 | ↓ |
| Homosildenafil | C23 H32 N6 O4 S | 488.21433 | 5.282 | 489.22156 | 0.445238234 | 0.008417561 | 1.170395034 | ↓ |
| Chlorindione | C15 H9 Cl O2 | 256.02884 | 1.36 | 257.03601 | 1.525090007 | 0.008460521 | 1.19217547 | ↑ |
| Hydroxyhomosildenafil | C23 H32 N6 O5 S | 504.21849 | 4.785 | 505.2258 | 0.171180991 | 0.008566328 | 1.561965414 | ↓ |
| Jasmonic acid | C12 H18 O3 | 210.12561 | 6.863 | 211.13277 | 0.342275444 | 0.008649016 | 1.307495595 | ↓ |
| PC (9:0/9:0) | C26 H52 N O8 P | 537.34551 | 7.324 | 538.35236 | 0.510381108 | 0.009400026 | 1.1698726 | ↓ |
| 17α-Ethynylestradiol | C20 H24 O2 | 314.18828 | 8.107 | 315.19519 | 1.788636407 | 0.009482944 | 1.284258223 | ↑ |
| DL-Glutamine | C5 H10 N2 O3 | 146.06905 | 1.356 | 147.07648 | 1.566903755 | 0.010351656 | 1.200464047 | ↑ |
| U-44069 | C21 H34 O4 | 332.23471 | 8.156 | 333.24249 | 0.403677722 | 0.010556815 | 1.205087573 | ↓ |
| DL-3-Aminoisobutyric acid | C4 H9 N O2 | 103.06339 | 1.777 | 104.07075 | 0.455679984 | 0.010755025 | 1.029416172 | ↓ |
| Ginsenoside Rg3 | C42 H72 O13 | 766.48534 | 7.09 | 767.49152 | 1.989655161 | 0.010988717 | 1.099288088 | ↑ |
| 2-Deoxyuridine | C9 H12 N2 O5 | 228.07457 | 1.44 | 229.08205 | 0.571818648 | 0.012472983 | 1.125407486 | ↓ |
| D-Sphingosine | C18 H37 N O2 | 299.28223 | 6.82 | 300.28955 | 0.465894867 | 0.012610763 | 1.12590546 | ↓ |
| Ala-Ile | C9 H18 N2 O3 | 202.13174 | 5.096 | 203.13898 | 0.498587509 | 0.012614451 | 1.105663079 | ↓ |
| Thymol | C10 H14 O | 150.10425 | 8.168 | 151.11183 | 0.493059886 | 0.012786766 | 1.247998692 | ↓ |
| (-)-Caryophyllene oxide | C15 H24 O | 220.18265 | 8.185 | 221.18965 | 0.483110566 | 0.013508367 | 1.231482296 | ↓ |
| nor-6α-Οxycodol | C17 H21 N O4 | 303.14292 | 1.846 | 304.15005 | 0.6004515 | 0.013899914 | 1.194462053 | ↓ |
| Carbendazim | C9 H9 N3 O2 | 191.06943 | 5.216 | 192.07672 | 0.275970274 | 0.013903432 | 1.045045698 | ↓ |
| Histamine | C5 H9 N3 | 111.07967 | 1.243 | 112.08678 | 0.339108012 | 0.013948285 | 1.053707936 | ↓ |
| PC (16:1e/2:0) | C26 H52 N O7 P | 521.34802 | 9.559 | 522.35583 | 0.182219169 | 0.014096173 | 1.098443549 | ↓ |
| L-Prolinamide | C5 H10 N2 O | 132.09189 | 1.575 | 133.09906 | 0.608752812 | 0.014916609 | 1.268778439 | ↓ |
| D-Fructose 1,6-bisphosphate | C6 H14 O12 P2 | 339.99569 | 1.543 | 341.00293 | 0.609592078 | 0.015138289 | 1.286448365 | ↓ |
| Ecgonine | C9 H15 N O3 | 185.10798 | 1.575 | 186.11519 | 0.397358887 | 0.015604724 | 1.381453192 | ↓ |
| Glycerol 1-hexadecanoate | C19 H38 O4 | 330.2768 | 8.112 | 331.28448 | 0.641643176 | 0.015870935 | 1.105381506 | ↓ |
| 4-Phenyl-3-buten-2-one | C10 H10 O | 146.073 | 6.462 | 147.07999 | 0.252210388 | 0.015908054 | 1.029265501 | ↓ |
| Carbaprostacyclin | C21 H34 O4 | 332.23456 | 7.318 | 333.24219 | 0.642136196 | 0.016023076 | 1.121694388 | ↓ |
| N-Carbamyl-L-glutamicacid | C6 H10 N2 O5 | 190.05888 | 1.353 | 191.06606 | 3.541645949 | 0.016080763 | 1.176795536 | ↑ |
| (+)-Aphidicolin | C20 H34 O4 | 360.22955 | 8.078 | 361.23697 | 0.666454402 | 0.016698293 | 1.281828836 | ↓ |
| Cardamomin | C16 H14 O4 | 270.08886 | 7.1 | 271.09613 | 3.034852932 | 0.017012549 | 1.10034377 | ↑ |
| Caprolactam | C6 H11 N O | 113.08406 | 1.429 | 114.09131 | 1.672310213 | 0.017186201 | 1.27578734 | ↑ |
| ACar 4:0 | C11 H22 N O4 | 231.14692 | 4.986 | 232.15436 | 3.089234735 | 0.017312792 | 1.137731209 | ↑ |
| Capsaicin | C18 H27 N O3 | 323.20884 | 6.689 | 324.21582 | 0.246804055 | 0.01820599 | 1.059719782 | ↓ |
| C-8 Ceramide-1-phosphate | C26 H52 N O6 P | 523.35795 | 7.909 | 524.36572 | 0.54042767 | 0.018730993 | 1.148124739 | ↓ |
| Maltol | C6 H6 O3 | 126.03163 | 5.26 | 127.03909 | 0.646689261 | 0.019613447 | 1.075119614 | ↓ |
| Asparagine | C4 H8 N2 O3 | 132.05345 | 1.389 | 133.06055 | 1.730483412 | 0.020464403 | 1.131785136 | ↑ |
| Acetyl-L-carnitine | C9 H17 N O4 | 203.11585 | 1.448 | 204.12331 | 2.849418688 | 0.023810809 | 1.150670099 | ↑ |
| Nicotinic acid | C6 H5 N O2 | 123.03206 | 1.459 | 124.03925 | 1.731984706 | 0.0239104 | 1.20955942 | ↑ |
| Betulin | C30 H50 O2 | 442.37993 | 7.093 | 443.38715 | 3.218549742 | 0.026808854 | 1.022177536 | ↑ |
| Leukotriene E4 | C23 H37 N O5 S | 439.23916 | 5.731 | 440.24646 | 1.816536956 | 0.029503191 | 1.021115376 | ↑ |
| Prolylleucine | C11 H20 N2 O3 | 228.15051 | 1.573 | 229.15776 | 0.220777436 | 0.032351464 | 1.268731129 | ↓ |
| 5-Hydroxytryptophol | C10 H11 N O2 | 177.07914 | 1.45 | 178.08644 | 0.513822025 | 0.033846671 | 1.04130965 | ↓ |
| Theobromine | C7 H8 N4 O2 | 180.06441 | 4.114 | 181.07169 | 3.959669036 | 0.037093045 | 1.069450527 | ↑ |
| Nobiletin | C21 H22 O8 | 402.13199 | 6.45 | 403.13907 | 2.608254436 | 0.037735829 | 1.482231627 | ↑ |
| N-Acetylputrescine | C6 H14 N2 O | 130.1106 | 1.432 | 131.11784 | 1.605931527 | 0.03902456 | 1.054702248 | ↑ |
| N-Acetyl-L-methionine | C7 H13 N O3 S | 191.06124 | 5.241 | 192.06851 | 0.501026516 | 0.043304312 | 1.02301848 | ↓ |
| Hydroxyprogesterone caproate | C27 H40 O4 | 428.29254 | 8.007 | 429.29987 | 0.446314046 | 0.044292452 | 1.010402245 | ↓ |
| β-Nicotinamide mononucleotide | C11 H15 N2 O8 P | 334.05679 | 1.438 | 335.064 | 0.424225118 | 0.047921265 | 1.015308758 | ↓ |
| Name | Formula | Molecular Weight | RT [min] | m/z | FC | Pvalue | VIP | Trend (based on LTBI) |
| Prostaglandin E2 | C20 H32 O5 | 388.20001 | 6.181 | 387.19284 | 266.3125515 | 1.68E-10 | 2.755929049 | ↑ |
| N'2-acetylpyridine-2-carbohydrazide | C8 H9 N3 O2 | 179.06978 | 1.746 | 178.06248 | 12.64048133 | 3.81E-08 | 2.536283461 | ↑ |
| Bicyclo Prostaglandin E2 | C20 H30 O4 | 370.19969 | 6.015 | 369.1926 | 0.33648434 | 1.37E-07 | 2.019023064 | ↓ |
| LysoPC 12:1 | C20 H36 N O7 P | 433.22111 | 6.047 | 432.21384 | 0.237456515 | 2.02E-07 | 1.803315451 | ↓ |
| LPE 15:0 | C20 H42 N O7 P | 439.27008 | 8.719 | 438.26303 | 0.160400701 | 7.02E-07 | 2.06878463 | ↓ |
| N-{3-[(3,5-difluorobenzyl)oxy]pyridin-2-yl}-4-pentylbenzenesulfonamide | C23 H24 F2 N2 O3 S | 446.14373 | 6.297 | 445.13632 | 12.83076499 | 1.16E-06 | 2.33698483 | ↑ |
| Kynurenic acid | C10 H7 N O3 | 189.0431 | 5.407 | 188.0356 | 0.335196618 | 1.21E-06 | 1.934330528 | ↓ |
| LPE 14:0 | C19 H40 N O7 P | 425.25459 | 8.408 | 424.24738 | 0.105291723 | 1.59E-06 | 2.079276726 | ↓ |
| Indole-3-carboxaldehyde | C9 H7 N O | 145.05313 | 5.727 | 144.04585 | 0.36728096 | 1.99E-06 | 1.771601643 | ↓ |
| LPC 20:4 | C28 H50 N O7 P | 589.33811 | 8.922 | 588.33118 | 0.41121452 | 2.32E-06 | 1.837917301 | ↓ |
| LPE 12:0 | C17 H36 N O7 P | 397.22306 | 7.57 | 396.21561 | 0.334776824 | 3.89E-06 | 2.034347144 | ↓ |
| 5-Hydroxyindole-2-carboxylic acid | C9 H7 N O3 | 177.04283 | 2.415 | 176.03505 | 3.248246862 | 4.72E-06 | 1.925091859 | ↑ |
| 23-Norcholic acid | C23 H38 O5 | 394.27233 | 6.83 | 393.26505 | 0.480818183 | 5.27E-06 | 1.957983058 | ↓ |
| LPE 18:1 | C23 H46 N O7 P | 479.30144 | 9.486 | 478.2944 | 0.046291926 | 6.95E-06 | 2.167418455 | ↓ |
| 13,14-dihydro-15-keto-tetranor Prostaglandin E2 | C16 H26 O5 | 298.17843 | 6.054 | 297.17087 | 0.374626567 | 9.10E-06 | 1.720706644 | ↓ |
| 13,14-dihydro Prostaglandin E1 | C20 H36 O5 | 356.25678 | 8.369 | 355.24942 | 0.396232849 | 1.02E-05 | 1.655945022 | ↓ |
| Abametapir | C12 H12 N2 | 184.10046 | 5.647 | 183.09323 | 0.490612024 | 1.35E-05 | 1.85394405 | ↓ |
| Prostaglandin A3 | C20 H28 O4 | 664.39821 | 6.705 | 663.39093 | 12.54728054 | 1.41E-05 | 2.111940976 | ↑ |
| Homotaurine | C3 H9 N O3 S | 139.03076 | 1.36 | 138.02348 | 0.2937817 | 1.76E-05 | 1.696781949 | ↓ |
| 3-[(methoxycarbonyl)amino]-2,2,3-trimethylbutanoic acid | C9 H17 N O4 | 203.11617 | 5.708 | 202.10889 | 0.254910663 | 2.24E-05 | 1.508623782 | ↓ |
| 5-Hydroxytryptophan | C11 H12 N2 O3 | 220.08525 | 5 | 219.07784 | 0.52812329 | 2.47E-05 | 1.71857099 | ↓ |
| Prostaglandin F2alpha | C20 H34 O5 | 354.2411 | 7.437 | 353.23383 | 0.458212198 | 2.57E-05 | 1.804769333 | ↓ |
| 8(S),15(S)-DiHETE | C20 H32 O4 | 336.23052 | 6.843 | 335.22324 | 0.43738725 | 2.88E-05 | 1.707690393 | ↓ |
| Lysopc 16:1 | C24 H48 N O7 P | 493.3192 | 8.121 | 492.31192 | 0.181536892 | 3.32E-05 | 1.826626065 | ↓ |
| 8-iso-15-keto Prostaglandin E2 | C20 H30 O5 | 700.41946 | 6.482 | 699.41223 | 27.24392241 | 3.34E-05 | 2.062663449 | ↑ |
| Tetrahydroaldosterone | C21 H32 O5 | 364.22542 | 7.108 | 363.21799 | 0.446958777 | 3.47E-05 | 1.677716304 | ↓ |
| (2-oxo-2,3-dihydro-1H-indol-3-yl)acetic acid | C10 H9 N O3 | 191.05854 | 5.53 | 190.05122 | 0.187419322 | 3.65E-05 | 1.595025606 | ↓ |
| LPE 16:1 | C21 H42 N O7 P | 451.27027 | 9.02 | 450.263 | 0.154464703 | 3.66E-05 | 1.663497324 | ↓ |
| 3-(3-Methoxyphenyl)propionic acid | C10 H12 O3 | 180.079 | 7.407 | 179.07172 | 0.326388522 | 3.75E-05 | 1.557489234 | ↓ |
| 7-Hydroxy-3,4-dihydrocarbostyril | C9 H9 N O2 | 163.06364 | 5.357 | 162.05634 | 0.139574691 | 3.84E-05 | 1.685364507 | ↓ |
| N-Acetyl-α-D-glucosamine 1-phosphate | C8 H16 N O9 P | 301.05632 | 1.514 | 300.04901 | 0.192101342 | 4.23E-05 | 1.739719029 | ↓ |
| L-Saccharopine | C11 H20 N2 O6 | 276.13251 | 1.464 | 275.12534 | 0.493160005 | 4.63E-05 | 1.608296043 | ↓ |
| Dodecanedioic acid | C12 H22 O4 | 230.15199 | 6.431 | 229.14459 | 0.427283929 | 4.86E-05 | 1.574978434 | ↓ |
| Tropolone | C7 H6 O2 | 122.03712 | 6.554 | 121.02985 | 0.54276362 | 5.21E-05 | 1.900275764 | ↓ |
| (±)9-HpODE | C18 H32 O4 | 312.23029 | 6.821 | 311.22311 | 0.537384227 | 5.28E-05 | 1.699667366 | ↓ |
| D-Mannose 6-phosphate | C6 H13 O9 P | 260.02995 | 1.25 | 259.02249 | 0.110861439 | 5.43E-05 | 1.60786142 | ↓ |
| Prostaglandin A1 | C20 H32 O4 | 318.21962 | 7.763 | 317.21222 | 0.043040004 | 5.44E-05 | 1.860176107 | ↓ |
| D-Glucuronic acid | C6 H10 O7 | 194.0418 | 6.066 | 387.07632 | 3.274303593 | 5.94E-05 | 1.70047755 | ↑ |
| O-Aceyl-L-Serine | C5 H9 N O4 | 147.05346 | 5.084 | 146.04607 | 0.43305125 | 5.94E-05 | 1.574631563 | ↓ |
| 4-chloro-2-(1H-pyrazol-3-yl)phenol | C9 H7 Cl N2 O | 194.02527 | 3.471 | 193.01799 | 0.082067865 | 6.56E-05 | 1.755370426 | ↓ |
| tetranor-PGFM | C16 H26 O7 | 312.15742 | 5.53 | 311.15015 | 0.229179639 | 9.66E-05 | 1.626993057 | ↓ |
| FAHFA (3:0/18:0) | C21 H40 O4 | 356.29316 | 9.907 | 355.28583 | 0.071095986 | 0.000101062 | 1.72119062 | ↓ |
| 5-oxoproline | C5 H7 N O3 | 129.04295 | 5.37 | 128.03568 | 0.615450535 | 0.000132777 | 1.560151547 | ↓ |
| Pyridoxine O-Glucoside | C14 H21 N O8 | 331.12703 | 1.986 | 330.11975 | 0.473576284 | 0.00013801 | 1.315568179 | ↓ |
| L-(-)-Glyceric acid | C3 H6 O4 | 106.02683 | 1.444 | 105.01954 | 0.384976598 | 0.000155848 | 1.587178014 | ↓ |
| 2-Furoylglycine | C7 H7 N O4 | 169.03792 | 5.347 | 168.0307 | 0.575004759 | 0.000159521 | 1.405186095 | ↓ |
| 2'-Deoxyadenosine 5'-monophosphate | C10 H14 N5 O6 P | 331.0683 | 1.899 | 330.06104 | 0.11593845 | 0.000168902 | 1.324156456 | ↓ |
| 4-(4-nitrophenylazo)aniline | C12 H10 N4 O2 | 242.0808 | 3.343 | 241.07364 | 4.660351965 | 0.000172633 | 1.882276661 | ↑ |
| Cyclohexylsulfamate | C6 H13 N O3 S | 179.06194 | 1.95 | 178.05496 | 0.16216682 | 0.000179246 | 1.955565334 | ↓ |
| Delta-Tridecalactone | C13 H24 O2 | 212.17801 | 6.617 | 211.17111 | 0.471145467 | 0.000185109 | 1.430869866 | ↓ |
| N-(1-benzylpiperidin-4-yl)-5-methoxy-1H-indole-2-carboxamide | C22 H25 N3 O2 | 363.19097 | 2.056 | 362.18369 | 0.409432445 | 0.000189636 | 1.647309302 | ↓ |
| 11-deoxy Corticosterone | C21 H30 O3 | 376.22676 | 6.42 | 375.22 | 0.478890618 | 0.000202039 | 1.387603768 | ↓ |
| tetranor-PGDM | C16 H24 O7 | 310.14186 | 5.518 | 309.13443 | 0.604206715 | 0.000210634 | 1.524109053 | ↓ |
| Methyl 3-indolyacetate | C11 H11 N O2 | 189.07955 | 5.469 | 188.07224 | 0.412856609 | 0.000215078 | 1.310382286 | ↓ |
| L-Tyrosinemethylester | C10 H13 N O3 | 195.08984 | 5.598 | 194.08247 | 0.50452534 | 0.000220846 | 1.456220816 | ↓ |
| 12-oxo Phytodienoic Acid | C18 H28 O3 | 292.20425 | 7.097 | 291.19672 | 0.193840551 | 0.000244818 | 1.507073804 | ↓ |
| 2-[(carboxymethyl)(methyl)amino]-5-methoxybenzoic acid | C11 H13 N O5 | 239.07982 | 3.108 | 238.07257 | 0.319211336 | 0.00024675 | 1.529349099 | ↓ |
| LPE 17:1 | C22 H44 N O7 P | 465.28615 | 9.115 | 464.27884 | 0.129278348 | 0.000265122 | 1.683255302 | ↓ |
| N-acetyl-D-glucosamine | C8 H15 N O6 | 221.09026 | 1.394 | 220.08284 | 0.625607011 | 0.000293372 | 1.42997321 | ↓ |
| Prostaglandin E1 | C20 H34 O5 | 390.21593 | 6.322 | 389.20868 | 0.40379025 | 0.000301046 | 1.443917585 | ↓ |
| Cannabigerolic acid | C22 H32 O4 | 157.1122 | 5.998 | 359.2226 | 2.149891027 | 0.000308914 | 1.946118816 | ↑ |
| Gly-Tyr-Ala | C14 H19 N3 O5 | 309.1329 | 5.188 | 308.12546 | 0.542981931 | 0.000338749 | 1.451036136 | ↓ |
| Tyrosylalanine | C12 H16 N2 O4 | 252.11141 | 2.873 | 251.10416 | 0.323885002 | 0.000363921 | 1.448517854 | ↓ |
| LPE 15:1 | C20 H40 N O7 P | 437.2546 | 8.587 | 436.24707 | 0.148054766 | 0.000363995 | 1.451178003 | ↓ |
| 5-OxoETE | C20 H30 O3 | 318.21877 | 7.873 | 317.21191 | 0.221759694 | 0.000368486 | 1.512089527 | ↓ |
| Guanosine monophosphate | C10 H14 N5 O8 P | 363.05688 | 2.497 | 362.04935 | 4.468661706 | 0.000368671 | 1.556288374 | ↑ |
| 6-Methoxy-2-naphthoic acid | C12 H10 O3 | 202.06374 | 5.285 | 201.05649 | 0.53231102 | 0.000370898 | 1.39949342 | ↓ |
| Toradol | C15 H13 N O3 | 255.08567 | 2.462 | 254.07835 | 0.466601062 | 0.000371012 | 1.412297889 | ↓ |
| Alanyltyrosine | C12 H16 N2 O4 | 252.11067 | 3.813 | 251.10341 | 0.277334839 | 0.000390767 | 1.396099788 | ↓ |
| LPE 16:0 | C21 H44 N O7 P | 453.28599 | 9.098 | 452.27841 | 0.232268035 | 0.000404748 | 1.487872252 | ↓ |
| Cymarin | C30 H44 O9 | 548.2998 | 7.913 | 547.29236 | 4.864270202 | 0.000446396 | 1.47463285 | ↑ |
| (±)12(13)-DiHOME | C18 H34 O4 | 314.2458 | 7.231 | 313.23849 | 0.440738347 | 0.000502781 | 1.537363769 | ↓ |
| LPE 17:0 | C22 H46 N O7 P | 467.30178 | 9.591 | 466.29443 | 0.276525428 | 0.000504084 | 1.670935535 | ↓ |
| 1-(3-phenylpropanoyl)-4-piperidinecarboxylic acid | C15 H19 N O3 | 261.13286 | 3.96 | 260.12558 | 0.560497716 | 0.000510821 | 1.487021352 | ↓ |
| D-Alanyl-D-alanine | C6 H12 N2 O3 | 160.0851 | 1.41 | 159.07791 | 0.56855378 | 0.000536535 | 1.451402788 | ↓ |
| N-acetyl-L-ornithine | C7 H14 N2 O3 | 174.1009 | 2.001 | 173.09363 | 0.555099983 | 0.000546599 | 1.339586189 | ↓ |
| Pantetheine | C11 H22 N2 O4 S | 278.13025 | 5.89 | 277.12305 | 0.399325442 | 0.000550432 | 1.640890815 | ↓ |
| 2-(2-oxo-2-{[2-(2-oxo-1-imidazolidinyl)ethyl]amino}ethoxy)acetic acid | C9 H15 N3 O5 | 245.10149 | 1.45 | 244.0941 | 0.614786567 | 0.000554617 | 1.423605439 | ↓ |
| 3-Phosphoglyceric acid | C3 H7 O7 P | 185.9933 | 1.563 | 184.98607 | 0.572627186 | 0.000611715 | 1.331150734 | ↓ |
| (±)9(10)-DiHOME | C18 H34 O4 | 314.24582 | 7.336 | 313.23862 | 0.382972 | 0.000630779 | 1.416320691 | ↓ |
| 10-Nitrolinoleate | C18 H31 N O4 | 325.22541 | 8.682 | 324.2182 | 0.501191965 | 0.000678826 | 1.60396475 | ↓ |
| D-2-Aminoadipic acid | C6 H11 N O4 | 161.06911 | 2.225 | 160.06192 | 2.012131026 | 0.000704995 | 1.58313166 | ↑ |
| LPC 18:0 | C26 H54 N O7 P | 569.36977 | 10.187 | 568.36279 | 0.160566135 | 0.000707534 | 1.724841337 | ↓ |
| L-Leucyl-L-alanine Hydrate | C9 H18 N2 O3 | 202.13233 | 4.821 | 201.12518 | 0.509974166 | 0.000713699 | 1.443155286 | ↓ |
| alpha-Benzylsuccinic acid | C11 H12 O4 | 208.07392 | 5.504 | 207.06642 | 0.517741668 | 0.000734195 | 1.384294637 | ↓ |
| β-Estradiol-17β-glucuronide | C24 H32 O8 | 448.21325 | 6.138 | 447.20605 | 0.443880796 | 0.000762996 | 1.486877371 | ↓ |
| 3-Methoxytyramine | C9 H13 N O2 | 167.09511 | 5.388 | 166.08748 | 0.615155475 | 0.000764857 | 1.331013592 | ↓ |
| D-Ribulose 1,5-bisphosphate | C5 H12 O11 P2 | 309.98592 | 1.435 | 308.97867 | 0.302685899 | 0.000827927 | 1.522171278 | ↓ |
| Propylparaben | C10 H12 O3 | 180.07903 | 6.217 | 179.07169 | 0.393182528 | 0.000838598 | 1.406107609 | ↓ |
| Tyramine | C8 H11 N O | 137.08431 | 5.613 | 136.07697 | 0.519624369 | 0.000844577 | 1.518212844 | ↓ |
| Glycerol 3-phosphate | C3 H9 O6 P | 172.0141 | 1.516 | 171.00685 | 0.343865377 | 0.000925053 | 1.352497454 | ↓ |
| 13,14-dihydro-15-keto-tetranor Prostaglandin D2 | C16 H26 O5 | 280.16771 | 6.094 | 279.16034 | 0.235647944 | 0.000960305 | 1.088342206 | ↓ |
| 20-hydroxy Leukotriene B4 | C20 H32 O5 | 370.23615 | 6.886 | 369.22861 | 0.623813411 | 0.001033051 | 1.743113236 | ↓ |
| Deoxycholic Acid | C24 H40 O4 | 392.29263 | 7.225 | 391.28543 | 0.322501096 | 0.001072827 | 1.424660375 | ↓ |
| 13,14-dihydro-19(R)-hydroxy Prostaglandin E1 | C20 H36 O6 | 354.24125 | 6.188 | 353.23404 | 0.351402025 | 0.001101648 | 1.453526351 | ↓ |
| Glycoursodeoxycholic acid | C26 H43 N O5 | 449.3226 | 7.124 | 448.31519 | 0.425898787 | 0.001152451 | 1.421370968 | ↓ |
| Pyridoxal 5'-phosphate hydrate | C8 H10 N O6 P | 247.02359 | 4.829 | 246.01631 | 0.46828 | 0.001198932 | 1.330537335 | ↓ |
| 13,14-dihydro-15-keto Prostaglandin A2 | C20 H30 O4 | 316.204 | 7.898 | 315.1969 | 0.560132648 | 0.001210608 | 1.3116412 | ↓ |
| NSI-189 | C22 H30 N4 O | 366.24101 | 7.792 | 365.23364 | 0.07993158 | 0.001219944 | 1.18172669 | ↓ |
| Nicotinate ribonucleoside | C11 H13 N O6 | 255.07489 | 5.179 | 254.06763 | 0.498179146 | 0.001221024 | 1.454895756 | ↓ |
| DL-o-Tyrosine | C9 H11 N O3 | 181.07427 | 5.93 | 180.06697 | 0.418482694 | 0.001233451 | 1.321679623 | ↓ |
| D-Fructose 6-phosphate | C6 H13 O9 P | 260.02995 | 1.615 | 259.02267 | 0.111839724 | 0.001241049 | 1.61110286 | ↓ |
| 6-Keto-prostaglandin f1alpha | C20 H34 O6 | 370.23561 | 7.599 | 369.22833 | 0.456034337 | 0.001248584 | 1.346805876 | ↓ |
| LPE 13:0 | C18 H38 N O7 P | 411.23885 | 7.865 | 410.23166 | 0.325470397 | 0.001249415 | 1.397408029 | ↓ |
| HexCer-AP (t18:0/16:0) | C40 H79 N O10 | 779.57629 | 11.015 | 778.56903 | 2.111823552 | 0.001281416 | 1.434334238 | ↑ |
| Lysopc 14:0 | C22 H46 N O7 P | 467.29983 | 5.669 | 466.29279 | 0.498538857 | 0.001283758 | 1.428974238 | ↓ |
| Nicotinamide | C6 H6 N2 O | 122.04837 | 5.159 | 121.04108 | 0.63128132 | 0.001289461 | 1.537379951 | ↓ |
| 5beta-Androstane-3,17-dione | C19 H28 O2 | 288.20923 | 7.326 | 287.20248 | 0.401552487 | 0.001299405 | 1.474581123 | ↓ |
| D-myo-Inositol 1,4-bisphosphate | C6 H14 O12 P2 | 339.99648 | 1.564 | 338.98932 | 0.134142389 | 0.001299954 | 1.864283702 | ↓ |
| 3-[4-methyl-1-(2-methylpropanoyl)-3-oxocyclohexyl]butanoic acid | C15 H24 O4 | 268.16899 | 6.053 | 267.1608 | 0.379382146 | 0.001313533 | 1.122706168 | ↓ |
| 2-(acetylamino)-4-(methylthio)butanoic acid | C7 H13 N O3 S | 191.05867 | 5.203 | 236.05695 | 0.554226257 | 0.001390111 | 1.368729683 | ↓ |
| Tetradecanedioic acid | C14 H26 O4 | 258.18345 | 6.922 | 257.17615 | 0.542680382 | 0.00141936 | 1.320450481 | ↓ |
| N1-[4-(trifluoromethyl)phenyl]-2-phenylbutanamide | C17 H16 F3 N O | 307.11972 | 3.946 | 306.11261 | 0.542772215 | 0.001445992 | 1.355853594 | ↓ |
| β-Estradiol 3-(β-D-glucuronide) 17-sulfate | C24 H32 O11 S | 528.16991 | 9.359 | 527.16382 | 0.570387871 | 0.001483043 | 1.2913994 | ↓ |
| LPS 17:1 | C23 H44 N O9 P | 509.27604 | 7.336 | 508.26877 | 0.577332221 | 0.001506714 | 1.488075372 | ↓ |
| Phellamurin | C26 H30 O11 | 518.18513 | 2.857 | 517.17761 | 0.414134664 | 0.001507769 | 1.530108135 | ↓ |
| Traumatic acid | C12 H20 O4 | 228.13652 | 5.839 | 227.12924 | 0.381487776 | 0.001509249 | 1.177649276 | ↓ |
| 4-Thiouridine | C9 H12 N2 O5 S | 260.04714 | 4.821 | 259.04007 | 0.662565895 | 0.001523878 | 1.292105458 | ↓ |
| 13,14-dihydro-15-keto-PGD2 | C20 H32 O5 | 352.22512 | 7.325 | 351.21747 | 0.405458012 | 0.001591483 | 1.485262593 | ↓ |
| Modafinil acid | C15 H14 O3 S | 274.06294 | 5.207 | 273.05566 | 0.494409248 | 0.001640258 | 1.312084373 | ↓ |
| 2'-Deoxycytidine 5'-monophosphate (dCMP) | C9 H14 N3 O7 P | 307.05711 | 1.463 | 306.0499 | 0.20619544 | 0.001672197 | 1.251808978 | ↓ |
| lithocholic acid 3-sulfate sodium salt | C24 H38 O6 S Na2 | 500.21643 | 5.844 | 499.20938 | 0.59703146 | 0.001697928 | 1.374267577 | ↓ |
| Corticosterone | C21 H30 O4 | 346.21816 | 7.409 | 345.21085 | 0.341928846 | 0.001883255 | 1.360044449 | ↓ |
| N1-[4-(aminosulfonyl)phenyl]-2-[4-(tert-butyl)phenoxy]propanamide | C19 H24 N2 O4 S | 376.14817 | 1.46 | 375.14117 | 0.517579361 | 0.00198411 | 1.267071676 | ↓ |
| Stercobilin | C33 H46 N4 O6 | 594.33321 | 5.532 | 593.32635 | 0.243284999 | 0.001989165 | 1.290872469 | ↓ |
| (5-L-Glutamyl)-L-Amino Acid | C8 H14 N2 O5 | 218.09053 | 1.441 | 217.08328 | 0.59783888 | 0.002111682 | 1.129944553 | ↓ |
| S-(5-Adenosy)-L-Homocysteine | C14 H20 N6 O5 S | 384.12171 | 5.312 | 383.11441 | 0.507734554 | 0.00212427 | 1.281832926 | ↓ |
| LPA 4:0 | C7 H15 O7 P | 242.0565 | 5.236 | 241.04929 | 0.470350663 | 0.002279886 | 1.342540919 | ↓ |
| 2,3-Dinor-TXB2 | C18 H30 O6 | 342.20369 | 5.449 | 341.19705 | 0.39404751 | 0.002321451 | 1.086151612 | ↓ |
| Capric acid | C10 H20 O2 | 172.14685 | 7.476 | 171.13913 | 0.327721673 | 0.002364871 | 1.426962418 | ↓ |
| N1-cyclohexyl-4-(4-fluorobenzyl)-1,4-diazepane-1-carbothioamide | C19 H28 F N3 S | 349.20077 | 5.495 | 348.19345 | 0.594651417 | 0.002375745 | 1.203951048 | ↓ |
| L-Asparagine | C4 H8 N2 O3 | 132.05363 | 5.337 | 131.04642 | 0.397897953 | 0.002399941 | 1.22279082 | ↓ |
| Kinetin 9-riboside | C15 H17 N5 O5 | 347.12371 | 5.231 | 346.11664 | 0.394891112 | 0.002505017 | 1.261934994 | ↓ |
| Adenosine 5'-monophosphate | C10 H14 N5 O7 P | 347.06257 | 1.956 | 346.0553 | 0.284689851 | 0.00254304 | 1.068427751 | ↓ |
| Nonanoic acid | C9 H18 O2 | 158.13103 | 6.026 | 157.12373 | 0.58175625 | 0.002686279 | 1.401086221 | ↓ |
| LPE 17:2 | C22 H42 N O7 P | 463.27047 | 8.818 | 462.26294 | 0.243249134 | 0.002727361 | 1.29537188 | ↓ |
| Ellagic acid | C14 H6 O8 | 302.00666 | 5.593 | 300.99939 | 0.44210783 | 0.002747795 | 1.343866851 | ↓ |
| Cer-BDS (d17:0/16:0) | C33 H67 N O4 | 587.51313 | 10.918 | 586.50592 | 1.773700974 | 0.002775568 | 1.325983945 | ↑ |
| Prostaglandin K1 | C20 H32 O5 | 334.2148 | 7.446 | 333.20749 | 0.598463098 | 0.002775687 | 1.087519625 | ↓ |
| Estrone | C18 H22 O2 | 316.16786 | 5.89 | 315.16049 | 0.095171198 | 0.002849478 | 1.140256777 | ↓ |
| 2-(benzoylamino)-4,5-dimethoxybenzoic acid | C16 H15 N O5 | 301.09529 | 5.718 | 300.08792 | 0.411154019 | 0.002884386 | 1.237441309 | ↓ |
| Spiculisporic Acid | C17 H28 O6 | 328.18894 | 6.306 | 327.18152 | 0.374113166 | 0.002930584 | 1.53947278 | ↓ |
| N1-(4-chlorophenyl)-3-(1H-pyrrol-1-ylmethyl)piperidine-1-carboxamide | C17 H20 Cl N3 O | 317.12672 | 5.386 | 316.11978 | 0.322298762 | 0.00293129 | 1.249941088 | ↓ |
| N-Acetyl-DL-norvaline | C7 H13 N O3 | 159.08993 | 5.343 | 158.08258 | 0.432699431 | 0.002974462 | 1.408256976 | ↓ |
| Guanosine-3',5'-cyclic monophosphate | C10 H12 N5 O7 P | 345.04785 | 2.671 | 344.04062 | 0.202475284 | 0.002991454 | 1.363040977 | ↓ |
| LPA 22:5 | C25 H41 O7 P | 968.53122 | 6.573 | 483.25833 | 1.78974241 | 0.003057573 | 1.199932159 | ↑ |
| 2'-Deoxyinosine | C10 H12 N4 O4 | 252.08609 | 3.856 | 251.07875 | 0.443468156 | 0.003194486 | 1.127599226 | ↓ |
| 4-(acetylamino)phenyl 6-(trifluoromethyl)pyridine-2-carboxylate | C15 H11 F3 N2 O3 | 324.07486 | 5.592 | 323.06763 | 0.59559174 | 0.003206342 | 1.340904904 | ↓ |
| Deoxyribose 5-Phosphate | C5 H11 O7 P | 214.02459 | 1.4 | 213.01709 | 0.339509177 | 0.003246592 | 1.225860769 | ↓ |
| lipoamide | C8 H15 N O S2 | 205.05893 | 1.415 | 204.05176 | 1.658937529 | 0.003370774 | 1.575346403 | ↑ |
| 2-Methoxyestradiol (2-MeOE2) | C19 H26 O3 | 302.18843 | 6.898 | 301.18097 | 0.627605 | 0.003401773 | 1.318610795 | ↓ |
| dUMP | C9 H13 N2 O8 P | 308.0419 | 1.526 | 307.0351 | 0.464292755 | 0.003473529 | 1.054111096 | ↓ |
| LPS 15:0 | C21 H42 N O9 P | 483.2593 | 11.88 | 482.25223 | 0.564232693 | 0.003486685 | 1.270531214 | ↓ |
| Phosphopyruvic acid | C3 H5 O6 P | 167.98285 | 1.612 | 166.97552 | 0.390034613 | 0.003505814 | 1.244530378 | ↓ |
| methyl 2-[(2-acetyl-3-oxo-1-butenyl)amino]acetate | C9 H13 N O4 | 199.08494 | 5.032 | 198.07756 | 0.578089426 | 0.003551049 | 1.450867469 | ↓ |
| N-Acetylalanine | C5 H9 N O3 | 131.05855 | 2.734 | 130.05128 | 0.642796194 | 0.003669309 | 1.644532768 | ↓ |
| Nonadecanoic acid | C19 H38 O2 | 298.28767 | 10.98 | 297.2804 | 1.547444929 | 0.003778071 | 1.311191854 | ↑ |
| 2-(3,4-dimethoxyphenyl)ethanamine | C10 H15 N O2 | 181.1106 | 5.817 | 180.10333 | 0.410725603 | 0.003845444 | 1.297207057 | ↓ |
| 7,8-Dihydrofolate | C19 H21 N7 O6 | 443.15532 | 5.848 | 442.14734 | 0.550889188 | 0.003982392 | 1.281856494 | ↓ |
| 2-Hydroxy-1-(4-methoxyphenyl)propyl hexopyranoside | C16 H24 O8 | 344.14765 | 5.71 | 343.14008 | 0.590439495 | 0.004010368 | 1.16854633 | ↓ |
| LPS 18:1 | C24 H46 N O9 P | 523.29129 | 9.335 | 522.28406 | 0.365423156 | 0.004011188 | 1.239074011 | ↓ |
| Prostaglandin E3 | C20 H30 O5 | 386.18506 | 6.564 | 385.1777 | 0.64631004 | 0.004077709 | 1.063311735 | ↓ |
| LPE 16:2 | C21 H40 N O7 P | 449.25472 | 8.457 | 448.2475 | 0.398211733 | 0.004222243 | 1.079571864 | ↓ |
| 6-(4-phenylpiperazino)hexanoic acid hydrochloride | C16 H24 N2 O2 | 276.18419 | 5.854 | 275.17676 | 0.304889748 | 0.004234144 | 1.113186192 | ↓ |
| Uridine monophosphate (UMP) | C9 H13 N2 O9 P | 324.03614 | 1.493 | 323.0289 | 0.306313888 | 0.004265903 | 1.196103283 | ↓ |
| Isophorone | C9 H14 O | 138.10457 | 6.484 | 137.09755 | 0.392313392 | 0.004275295 | 1.085147343 | ↓ |
| 2-{[3-(3,4,5-trimethoxyphenyl)propanoyl]amino}acetic acid | C14 H19 N O6 | 594.2428 | 5.562 | 296.11423 | 0.206340224 | 0.004292358 | 1.202420103 | ↓ |
| N1-tetrahydrofuran-2-ylmethyl-2-cyanoacetamide | C8 H12 N2 O2 | 168.09019 | 3.983 | 167.08293 | 0.53763519 | 0.004317957 | 1.339577978 | ↓ |
| α-Cyclodextrin | C36 H60 O30 | 972.31877 | 4.838 | 971.31189 | 0.623503683 | 0.004404899 | 1.196790385 | ↓ |
| Salicylic acid | C7 H6 O3 | 138.03205 | 5.492 | 137.02472 | 0.59960614 | 0.004444789 | 1.082360683 | ↓ |
| PA (8:0/18:2) | C29 H53 O8 P | 560.33919 | 9.884 | 559.3316 | 0.313603379 | 0.004499626 | 1.300103192 | ↓ |
| 2-(2-carboxy-2-methylpropyl)-4,6-dimethylbenzoic acid | C14 H18 O4 | 250.12093 | 5.936 | 249.11359 | 0.267728358 | 0.004577898 | 1.246864362 | ↓ |
| Glycocholic acid | C26 H43 N O6 | 465.30886 | 6.812 | 464.30139 | 7.294036607 | 0.004888677 | 1.133646987 | ↑ |
| 2-Hydroxy-2-methyl-3-buten-1-yl beta-D-glucopyranoside | C11 H20 O7 | 310.12693 | 4.872 | 665.25177 | 0.229931722 | 0.004893845 | 1.401852609 | ↓ |
| N-Acetyl-L-glutamine | C7 H12 N2 O4 | 188.08012 | 1.761 | 187.07286 | 0.630965227 | 0.004976767 | 1.28618654 | ↓ |
| 3-(1,1,2,3,3,3-hexafluoropropyl)adamantane-1-carboxylic acid | C14 H16 F6 O2 | 330.11059 | 5.549 | 329.10321 | 0.39077769 | 0.005039099 | 1.137775796 | ↓ |
| Lithocholic Acid | C24 H40 O3 | 376.29781 | 8.859 | 375.29071 | 0.565333638 | 0.005097371 | 1.446342072 | ↓ |
| 6-Aminonicotinamide | C6 H7 N3 O | 137.05837 | 5.251 | 273.10947 | 0.458537253 | 0.005186922 | 1.645376496 | ↓ |
| FAHFA (20:3/22:5) | C42 H66 O4 | 634.49418 | 10.282 | 633.48627 | 3.231476599 | 0.005192198 | 1.354570893 | ↑ |
| Taurocholic acid | C26 H45 N O7 S | 515.29194 | 9.163 | 514.28467 | 7.577334992 | 0.00544939 | 1.125201215 | ↑ |
| Chenodeoxycholic acid-3-beta-D-glucuronide | C30 H48 O10 | 568.32256 | 5.355 | 567.31525 | 0.585174128 | 0.00559382 | 1.060456379 | ↓ |
| 6-chloro-2-methyl-4-[(2,3,4,5,6-pentamethylbenzyl)oxy]quinoline | C22 H24 Cl N O | 353.15941 | 4.816 | 352.15228 | 0.574458872 | 0.005745189 | 1.295232814 | ↓ |
| N-METHYL (-)EPHEDRINE | C11 H17 N O | 179.13136 | 5.872 | 178.12408 | 0.54496484 | 0.005760663 | 1.001449069 | ↓ |
| D-(-)-Ribose | C5 H10 O5 | 150.05309 | 1.446 | 149.04591 | 1.51253848 | 0.005769475 | 1.133467473 | ↑ |
| GW501516 | C21 H18 F3 N O3 S2 | 453.07008 | 1.852 | 498.0683 | 0.443829265 | 0.005773767 | 1.334939801 | ↓ |
| N1-(2-methyl-3-nitrophenyl)cyclohexane-1-carboxamide | C14 H18 N2 O3 | 131.06759 | 5.197 | 261.12808 | 0.36102464 | 0.005793567 | 1.022793521 | ↓ |
| L-Histidinol | C6 H11 N3 O | 141.09058 | 1.474 | 140.08328 | 0.5654978 | 0.00599418 | 1.17758418 | ↓ |
| 3-(4-chlorophenyl)-5-(3-phenyl-1H-pyrazol-4-yl)-1,2,4-oxadiazole | C17 H11 Cl N4 O | 223.1213 | 4.992 | 222.11401 | 0.091554609 | 0.006280639 | 1.153594873 | ↓ |
| Lysopc 17:0 | C25 H52 N O7 P | 509.34846 | 10.187 | 508.3414 | 0.232306351 | 0.006419409 | 1.450414061 | ↓ |
| Sinapyl aldehyde | C11 H12 O4 | 208.07396 | 5.993 | 207.06668 | 0.157016028 | 0.006640503 | 1.17337945 | ↓ |
| Hypoxanthine | C5 H4 N4 O | 136.03882 | 1.934 | 135.03149 | 0.602296461 | 0.006645 | 1.136336031 | ↓ |
| Galactonic acid | C6 H12 O7 | 196.05852 | 1.36 | 195.05119 | 2.470640557 | 0.006866564 | 1.028245132 | ↑ |
| (±)7(8)-DiHDPA | C22 H34 O4 | 362.24606 | 8.338 | 361.23798 | 0.659846491 | 0.007224036 | 1.24974166 | ↓ |
| tetranor-12(R)-HETE | C16 H26 O3 | 266.18845 | 6.568 | 265.18137 | 0.583774799 | 0.007294026 | 1.264150624 | ↓ |
| Glycochenodeoxycholic Acid (sodium salt) | C26 H43 N O5 | 449.31428 | 8.529 | 448.3071 | 6.216412647 | 0.007349738 | 1.257897606 | ↑ |
| Guanosine | C10 H13 N5 O5 | 283.09173 | 2.425 | 282.08435 | 0.649339579 | 0.007556237 | 1.007127745 | ↓ |
| Sinapic acid | C11 H12 O5 | 224.06895 | 5.342 | 223.06172 | 0.608370703 | 0.00783953 | 1.095375065 | ↓ |
| DL-3,4-Dihydroxyphenyl glycol | C8 H10 O4 | 170.05766 | 5.644 | 385.11353 | 0.497242066 | 0.008129983 | 1.021282178 | ↓ |
| 4-(beta-D-Glucopyranosyloxy)-2-methylenebutanoic acid | C11 H18 O8 | 278.10082 | 5.106 | 277.09384 | 0.612495746 | 0.008230659 | 1.370292873 | ↓ |
| N6-Acetyl-L-Lysine | C8 H16 N2 O3 | 188.11654 | 1.466 | 187.10931 | 0.6303942 | 0.008464514 | 1.297050185 | ↓ |
| 19(R)-hydroxy Prostaglandin A2 | C20 H30 O5 | 332.19911 | 6.694 | 331.19186 | 0.574425276 | 0.00856128 | 1.257102891 | ↓ |
| L-Adrenaline | C9 H13 N O3 | 183.08982 | 5.593 | 182.08252 | 0.645422828 | 0.008921605 | 1.178693618 | ↓ |
| 2,8-Quinolinediol | C9 H7 N O2 | 161.04799 | 4.593 | 160.04071 | 0.295026591 | 0.009374016 | 1.012829006 | ↓ |
| mephedrone-d3 | C11 H12 [2]H3 N O | 179.95662 | 1.218 | 178.94937 | 0.621164531 | 0.009740515 | 1.109972733 | ↓ |
| Lysopc 20:0 | C28 H58 N O7 P | 551.39383 | 8.973 | 550.38641 | 0.467738365 | 0.009741845 | 1.318160173 | ↓ |
| LPE 20:3 | C25 H46 N O7 P | 503.30123 | 9.258 | 502.29367 | 0.515245947 | 0.009973073 | 1.098533933 | ↓ |
| 10-Hydroxydecanoic acid | C10 H20 O3 | 188.14161 | 6.161 | 187.13429 | 0.406207725 | 0.010501529 | 1.004561343 | ↓ |
| Thymidine 5'-monophosphate | C10 H15 N2 O8 P | 322.05687 | 2.514 | 321.04959 | 0.088425096 | 0.011410649 | 1.033204052 | ↓ |
| 1-(4-Methoxyphenyl)-2-propanone | C10 H12 O2 | 164.08412 | 5.688 | 209.08229 | 0.58005247 | 0.012264047 | 1.145901447 | ↓ |
| 2-Hydroxymyristic acid | C14 H28 O3 | 198.19866 | 8.603 | 197.19119 | 0.424622512 | 0.012411114 | 1.267214962 | ↓ |
| 4-Phenylbutyric acid | C10 H12 O2 | 164.08412 | 5.885 | 163.07683 | 0.621231764 | 0.012417784 | 1.280700722 | ↓ |
| DL-methionine sulfoxide | C5 H11 N O3 S | 165.04636 | 1.363 | 164.03903 | 2.04377106 | 0.01278833 | 1.176313623 | ↑ |
| LysoPE 18:2 | C23 H44 N O7 P | 477.28575 | 6.535 | 476.27829 | 0.602930975 | 0.013221873 | 1.031974077 | ↓ |
| 4-Pyridoxic acid | C8 H9 N O4 | 183.0535 | 3.586 | 182.04616 | 0.570755612 | 0.013259834 | 1.091452656 | ↓ |
| 11-Deoxy prostaglandin F2β | C20 H34 O4 | 180.11375 | 5.455 | 359.22021 | 0.512409507 | 0.01347806 | 1.14266551 | ↓ |
| 2,3-dinor Prostaglandin E1 | C18 H30 O5 | 362.18825 | 9.109 | 361.18097 | 0.160715725 | 0.013816331 | 1.137252755 | ↓ |
| α-D-Glucose-1,6-bisphosphate | C6 H14 O12 P2 | 339.99647 | 1.411 | 338.9892 | 0.275067909 | 0.013951294 | 1.388833302 | ↓ |
| 17(S)-HpDHA | C22 H32 O4 | 360.23064 | 7.423 | 359.22342 | 0.516742175 | 0.014656765 | 1.029847224 | ↓ |
| 4,6-dimethyl-2-(methylamino)-5-nitronicotinonitrile | C9 H10 N4 O2 | 206.0793 | 5.431 | 205.07196 | 39.42825671 | 0.014676314 | 1.882972978 | ↑ |
| N-(1-benzothiophen-3-yl)-N'-(1-benzyl-4-piperidinyl)urea | C21 H23 N3 O S | 365.15959 | 5.163 | 364.15237 | 0.622182734 | 0.014687343 | 1.126698159 | ↓ |
| (±)11(12)-EET | C20 H32 O3 | 320.23531 | 8.41 | 319.22797 | 0.537491692 | 0.015041465 | 1.261771333 | ↓ |
| 4-Hydroxybenzylalcohol | C7 H8 O2 | 124.05275 | 5.568 | 123.04546 | 0.293275633 | 0.015107602 | 1.149744164 | ↓ |
| gamma-Glutamyltyrosine | C14 H18 N2 O6 | 310.11707 | 4.98 | 309.10983 | 0.589547567 | 0.015150621 | 1.069026495 | ↓ |
| Malonic acid | C3 H4 O4 | 104.0112 | 1.576 | 103.00391 | 6.789138253 | 0.015184499 | 1.101922367 | ↑ |
| (1R,3R,4R,5R)-(-)-Quinic acid | C7 H12 O6 | 192.06374 | 5.263 | 191.05644 | 2.921853895 | 0.015735842 | 1.104121065 | ↑ |
| Chenodeoxycholic Acid | C24 H40 O4 | 438.29813 | 7.97 | 437.29092 | 0.66098742 | 0.016082938 | 1.479479061 | ↓ |
| methyl 2-cyano-2-[2-nitro-4-(trifluoromethyl)phenyl]acetate | C11 H7 F3 N2 O4 | 288.04175 | 5.197 | 287.03442 | 4.030754662 | 0.016087447 | 1.628932132 | ↑ |
| α-D-Mannose 1-phosphate | C6 H13 O9 P | 260.02989 | 1.317 | 259.02261 | 0.209432598 | 0.016364817 | 1.191994988 | ↓ |
| 4-Ethylphenol | C8 H10 O | 122.07337 | 5.623 | 121.06606 | 0.62250991 | 0.016409414 | 1.005198052 | ↓ |
| 23-Nordeoxycholic acid | C23 H38 O4 | 378.27729 | 6.573 | 377.27042 | 2.702238221 | 0.016425561 | 1.103045852 | ↑ |
| L-Homocystine | C8 H16 N2 O4 S2 | 268.05473 | 1.732 | 267.04745 | 0.622160162 | 0.016429955 | 1.075603431 | ↓ |
| 3b,7b-Dihydroxy-5-androsten-17-one | C19 H28 O3 | 304.2042 | 5.994 | 303.19693 | 3.13210638 | 0.017278231 | 1.228442221 | ↑ |
| Propionyl-L-carnitine | C10 H19 N O4 | 217.13187 | 5.263 | 216.12444 | 0.622195842 | 0.017441724 | 1.234775226 | ↓ |
| L-beta-Imidazolelactic acid | C6 H8 N2 O3 | 156.05389 | 2.255 | 155.04662 | 0.430558921 | 0.017686913 | 1.000043635 | ↓ |
| Xanthosine | C10 H12 N4 O6 | 284.0759 | 3.549 | 283.06854 | 0.485892674 | 0.017956027 | 1.070438626 | ↓ |
| 4-Hydroxy-2-Oxoglutaric Acid | C5 H6 O6 | 162.01686 | 1.53 | 161.00963 | 4.686930117 | 0.018475273 | 1.050265309 | ↑ |
| DL-Norvaline | C5 H11 N O2 | 117.07928 | 5.364 | 116.07203 | 0.607326097 | 0.018694729 | 1.321998634 | ↓ |
| 2-Propylglutaric acid | C8 H14 O4 | 174.0895 | 5.896 | 173.08229 | 0.588996181 | 0.019050698 | 1.024564652 | ↓ |
| 3-(3-nitrophenyl)-2-phenylacrylic acid | C15 H11 N O4 | 290.04655 | 5.294 | 289.03925 | 0.267920152 | 0.019436924 | 1.308511341 | ↓ |
| DGDG (16:3/18:3) | C49 H80 O15 | 954.55623 | 11.578 | 953.54895 | 1.552326314 | 0.020472727 | 1.090958859 | ↑ |
| Glutaric acid | C5 H8 O4 | 132.04255 | 4.366 | 131.03514 | 0.5714663 | 0.022975136 | 1.251979704 | ↓ |
| 9-KODE | C18 H30 O3 | 294.21829 | 6 | 293.21231 | 0.601034248 | 0.023079309 | 1.010651806 | ↓ |
| Methyl beta-D-galactopyranoside | C7 H14 O6 | 194.07935 | 1.656 | 193.0721 | 1.645720585 | 0.024226095 | 1.004481152 | ↑ |
| L(-)-Fucose | C6 H12 O5 | 164.06893 | 1.692 | 163.06168 | 2.049644207 | 0.024257684 | 1.11668748 | ↑ |
| L-Anserine | C10 H16 N4 O3 | 240.12277 | 1.312 | 239.11546 | 0.660010893 | 0.024298207 | 1.06082424 | ↓ |
| ethyl 1-cyclohexyl-4,5-dioxopyrrolidine-3-carboxylate | C13 H19 N O4 | 253.13191 | 5.723 | 252.12459 | 0.624733638 | 0.025516708 | 1.055974374 | ↓ |
| Protoporphyrin IX | C34 H34 N4 O4 | 562.25867 | 9.955 | 561.25134 | 1.911998638 | 0.02605262 | 1.341028926 | ↑ |
| 1,2,3-cyclopropanetricarboxylic acid | C6 H6 O6 | 174.0168 | 1.561 | 173.00943 | 2.853012025 | 0.026786568 | 1.011186461 | ↑ |
| Methyl-beta-galactopyranoside | C7 H14 O6 | 194.07933 | 1.473 | 175.06151 | 4.439279171 | 0.027389446 | 1.031963778 | ↑ |
| Adipic acid | C6 H10 O4 | 146.05831 | 5.315 | 145.05096 | 0.391526775 | 0.029046596 | 1.410565127 | ↓ |
| 3,8,9-trihydroxy-10-propyl-3,4,5,8,9,10-hexahydro-2H-oxecin-2-one | C12 H20 O5 | 244.1314 | 5.716 | 243.12416 | 0.639216523 | 0.030482472 | 1.067681149 | ↓ |
| 3,5-Dihydroxybenzoic acid | C7 H6 O4 | 154.02444 | 4.408 | 199.02266 | 0.633042084 | 0.03194793 | 1.306215583 | ↓ |
| LPS 14:0 | C20 H40 N O9 P | 469.24922 | 11.257 | 468.24194 | 0.444803566 | 0.03328322 | 1.15390556 | ↓ |
| Glycodeoxycholic Acid (hydrate) | C26 H43 N O5 | 449.31454 | 7.454 | 448.30722 | 0.440476845 | 0.034384009 | 1.066446802 | ↓ |
| Chrysin | C15 H10 O4 | 254.05823 | 6.627 | 253.05092 | 4.962178599 | 0.034535368 | 1.142207348 | ↑ |
| Salvinorin B | C21 H26 O7 | 390.17128 | 10.54 | 389.16394 | 1.659337447 | 0.037379549 | 1.005789633 | ↑ |
| N-(3,4-dimethoxyphenethyl)-N'-(3,4,5-trimethoxybenzoyl)thiourea | C21 H26 N2 O6 S | 434.1582 | 5.708 | 433.15088 | 8.068924176 | 0.043187292 | 1.267723801 | ↑ |
| FAHFA (2:0/16:0) | C18 H34 O4 | 314.24591 | 10.212 | 313.23871 | 0.354201923 | 0.043746928 | 1.048758211 | ↓ |
| 12-Hydroxydodecanoic acid | C12 H24 O3 | 170.16725 | 7.103 | 169.16005 | 0.653023846 | 0.04587098 | 1.047502405 | ↓ |
| LPS 15:1 | C21 H40 N O9 P | 481.24442 | 10.551 | 480.23715 | 0.227377924 | 0.047142793 | 1.445155966 | ↓ |
| Hesperetin | C16 H14 O6 | 302.07869 | 6.141 | 303.08603 | 9.082413502 | 3.78E-11 | 2.777474185 | ↑ |
| 17alpha-Ethinyl estradiol | C20 H24 O2 | 296.17756 | 8.422 | 297.18466 | 50.94275592 | 1.72E-10 | 2.685951022 | ↑ |
| Isobutyl benzoate | C11 H14 O2 | 178.09929 | 8.456 | 179.10672 | 11.19250796 | 4.91E-09 | 2.514274166 | ↑ |
| (+/-)-Equol | C15 H14 O3 | 242.09413 | 6.095 | 243.10165 | 7.345872871 | 3.06E-08 | 2.361753291 | ↑ |
| Biochanin A | C16 H12 O5 | 284.06811 | 6.17 | 285.07553 | 4.356887444 | 4.13E-08 | 2.199625906 | ↑ |
| Purpurin | C14 H8 O5 | 256.03417 | 6.136 | 257.04144 | 8.38454841 | 6.03E-08 | 2.449510457 | ↑ |
| 4-Methoxycinnamaldehyde | C10 H10 O2 | 162.06797 | 6.745 | 163.07509 | 0.422845632 | 1.02E-07 | 2.108645094 | ↓ |
| Coenzyme Q1 | C14 H18 O4 | 250.12011 | 6.112 | 251.12766 | 2.853599013 | 1.42E-07 | 2.242690951 | ↑ |
| ACar 22:3 | C29 H52 N O4 | 477.38024 | 6.173 | 478.38751 | 6.021533772 | 1.72E-07 | 2.336068588 | ↑ |
| 4',7-Dihydroxyflavanone | C15 H12 O4 | 239.04662 | 6.077 | 240.05437 | 3.813028211 | 1.72E-07 | 2.215362161 | ↑ |
| dAMP | C10 H14 N5 O6 P | 331.06859 | 6.168 | 332.07587 | 5.469859577 | 1.83E-07 | 2.323011412 | ↑ |
| PC (14:0e/2:0) | C24 H50 N O7 P | 495.32906 | 6.158 | 496.3367 | 5.859858342 | 2.10E-07 | 2.322197226 | ↑ |
| Narasin | C43 H72 O11 | 781.5311 | 6.107 | 782.53821 | 6.911992647 | 3.02E-07 | 2.328716615 | ↑ |
| (1R,2R)-trans-N-Boc-1,2-cyclohexanediamine | C11 H22 N2 O2 | 214.16803 | 4.756 | 215.17529 | 194.8162691 | 4.20E-07 | 2.425291268 | ↑ |
| 5-Hydroxymethyl-2-furancarboxylic acid | C6 H6 O4 | 142.02629 | 6.132 | 143.03352 | 3.405973411 | 5.04E-07 | 2.387154195 | ↑ |
| Myristicin | C11 H12 O3 | 192.08118 | 6.216 | 193.08846 | 3.320236593 | 6.08E-07 | 2.034123687 | ↑ |
| Diosmetin | C16 H12 O6 | 300.06499 | 6.092 | 301.07227 | 2.217880904 | 1.11E-06 | 2.014207761 | ↑ |
| PC (6:0/7:0) | C21 H42 N O8 P | 467.27024 | 8.512 | 468.27841 | 5.675172238 | 1.14E-06 | 2.080829435 | ↑ |
| Withanolide A | C28 H38 O6 | 470.26541 | 6.925 | 471.27292 | 0.466773848 | 1.28E-06 | 1.985461602 | ↓ |
| Magnolol | C18 H18 O2 | 266.12602 | 6.116 | 267.13324 | 5.258818166 | 1.34E-06 | 2.173990563 | ↑ |
| Citrinin | C13 H14 O5 | 272.06821 | 6.099 | 273.07568 | 2.60947553 | 3.70E-06 | 1.93830456 | ↑ |
| Prostaglandin B2 | C20 H30 O4 | 334.21385 | 6.115 | 335.22153 | 2.382595086 | 3.84E-06 | 2.027522368 | ↑ |
| 9-Aminoacridine | C13 H10 N2 | 194.08432 | 6.231 | 195.0916 | 6.849981259 | 4.33E-06 | 2.070265897 | ↑ |
| ACar 20:6 | C27 H42 N O4 | 443.30306 | 6.152 | 444.31018 | 3.354639234 | 5.95E-06 | 2.021817548 | ↑ |
| Obacunoic acid | C26 H32 O8 | 472.20934 | 6.222 | 473.2171 | 3.757020503 | 8.61E-06 | 2.266242451 | ↑ |
| 3,4-Dimethylbenzoic acid | C9 H10 O2 | 150.068 | 8.562 | 151.07521 | 5.555581124 | 9.20E-06 | 1.818002326 | ↑ |
| 3-Methoxy prostaglandin F1α | C21 H38 O6 | 368.25734 | 7.617 | 369.26514 | 0.547687148 | 9.29E-06 | 1.61786079 | ↓ |
| alpha-Farnesene | C15 H24 | 204.18781 | 6.92 | 205.1951 | 0.342746331 | 1.08E-05 | 1.823426382 | ↓ |
| ACar 11:0 | C18 H36 N O4 | 329.25643 | 6.083 | 330.26379 | 4.361544841 | 1.10E-05 | 1.965035441 | ↑ |
| L-Thyroxine | C15 H11 I4 N O4 | 776.68651 | 6.207 | 777.69379 | 4.758513012 | 1.14E-05 | 1.945630124 | ↑ |
| Sulfamethazine | C12 H14 N4 O2 S | 278.08147 | 6.227 | 279.08875 | 2.520466943 | 1.18E-05 | 1.905180119 | ↑ |
| N-Acetylanthranilic acid | C9 H9 N O3 | 197.06864 | 6.203 | 198.07568 | 2.37617716 | 1.44E-05 | 2.035331229 | ↑ |
| 10-Undecenoic acid | C11 H20 O2 | 184.147 | 7.36 | 391.28323 | 0.28969161 | 1.87E-05 | 1.735565947 | ↓ |
| 3',4'-Dihydroxyphenylacetone | C9 H10 O3 | 166.0627 | 6.199 | 167.06998 | 3.095568484 | 2.76E-05 | 2.082925476 | ↑ |
| L-arginine | C6 H14 N4 O2 | 174.11198 | 4.846 | 175.11923 | 0.438568955 | 3.05E-05 | 1.960592557 | ↓ |
| Artemisinin | C15 H22 O5 | 130.08206 | 6.187 | 131.0896 | 2.465967507 | 3.13E-05 | 1.894479328 | ↑ |
| Apigenin | C15 H10 O5 | 270.05415 | 6.093 | 271.06143 | 1.716238237 | 3.20E-05 | 1.809924707 | ↑ |
| Acetophenone | C8 H8 O | 120.05756 | 8.045 | 103.05432 | 0.547942831 | 3.57E-05 | 1.767527433 | ↓ |
| Pyridoxamine | C8 H12 N2 O2 | 168.09004 | 1.336 | 169.09746 | 0.505856046 | 4.01E-05 | 1.582285277 | ↓ |
| Fludrocortisone acetate | C23 H31 F O6 | 422.2071 | 6.166 | 423.2149 | 4.467125725 | 4.08E-05 | 1.839240009 | ↑ |
| Coumestrol | C15 H8 O5 | 268.03687 | 6.148 | 269.04361 | 2.256539533 | 4.82E-05 | 1.815121987 | ↑ |
| Licochalcone A | C21 H22 O4 | 338.15151 | 6.815 | 339.15848 | 11.65441268 | 5.01E-05 | 2.121553804 | ↑ |
| 18-β-Glycyrrhetinic acid | C30 H46 O4 | 470.33919 | 8.485 | 471.34634 | 55.64164774 | 5.27E-05 | 1.935727581 | ↑ |
| 2,6-Di-tert-butyl-1,4-benzoquinone | C14 H20 O2 | 220.14769 | 6.182 | 221.15497 | 2.127782459 | 5.41E-05 | 1.820271515 | ↑ |
| L-5-Hydroxytryptophan | C11 H12 N2 O3 | 220.08457 | 5.091 | 221.09183 | 0.392323961 | 6.16E-05 | 1.84301933 | ↓ |
| Eicosapentaenoic acid | C20 H30 O2 | 302.22428 | 7.287 | 303.23166 | 0.101267359 | 6.26E-05 | 1.682418469 | ↓ |
| cis-Resveratrol | C14 H12 O3 | 228.0785 | 6.247 | 229.08568 | 1.982424 | 6.79E-05 | 1.701011926 | ↑ |
| Histidine | C6 H9 N3 O2 | 155.07299 | 4.859 | 156.08022 | 0.644379752 | 8.14E-05 | 1.563093234 | ↓ |
| D-Gluconic acid | C6 H12 O7 | 196.05818 | 1.363 | 179.05481 | 1.719084324 | 9.36E-05 | 1.437429192 | ↑ |
| 5-fluoro AB-PINACA N-(4-hydroxypentyl) metabolite | C18 H25 F N4 O3 | 386.17262 | 7.096 | 387.1799 | 2.709251302 | 0.00011261 | 1.740894795 | ↑ |
| (9cis)-Retinal | C20 H28 O | 284.2137 | 6.094 | 285.22134 | 2.816513709 | 0.000126833 | 1.747238393 | ↑ |
| Safrole | C10 H10 O2 | 162.0679 | 8.023 | 163.07501 | 0.5732685 | 0.000134388 | 1.782681705 | ↓ |
| 3-Acetyl-2,5-dimethylfuran | C8 H10 O2 | 138.0678 | 6.413 | 121.06451 | 0.617538991 | 0.000147787 | 1.572713482 | ↓ |
| Melatonin | C13 H16 N2 O2 | 232.1209 | 6.567 | 233.12816 | 0.357036553 | 0.000156014 | 1.635109046 | ↓ |
| 5,6-Dihydrouracil | C4 H6 N2 O2 | 114.0429 | 1.751 | 115.05016 | 0.490072342 | 0.000165244 | 1.649519446 | ↓ |
| Pregnenolone | C21 H32 O2 | 316.23991 | 7.669 | 317.24707 | 0.416617399 | 0.000201081 | 1.550978709 | ↓ |
| 2,6-Dihydroxybenzoic acid | C7 H6 O4 | 154.02644 | 1.451 | 155.03363 | 2.176566353 | 0.000218962 | 1.746876534 | ↑ |
| Coenzyme Q2 | C19 H26 O4 | 318.18305 | 7.61 | 319.19034 | 0.550172209 | 0.000235719 | 1.686158272 | ↓ |
| (+/-)12(13)-DiHOME | C18 H34 O4 | 296.23483 | 6.521 | 297.24197 | 0.325465409 | 0.000236234 | 1.332966594 | ↓ |
| 11-Deoxy prostaglandin F1α | C20 H36 O4 | 362.24418 | 6.849 | 363.25113 | 0.549559532 | 0.000290404 | 1.589194467 | ↓ |
| 4-Hydroxymandelonitrile | C8 H7 N O2 | 149.0477 | 5.048 | 150.05495 | 0.578266486 | 0.000301547 | 1.394713641 | ↓ |
| Wogonin | C16 H12 O5 | 284.06776 | 6.53 | 285.07483 | 6.235415269 | 0.000305002 | 1.670698746 | ↑ |
| Norbuprenorphine | C25 H35 N O4 | 413.26189 | 6.886 | 414.26938 | 0.358121743 | 0.000329033 | 1.538350895 | ↓ |
| Limonin | C26 H30 O8 | 452.18158 | 7.024 | 453.18985 | 18.00008563 | 0.000358609 | 1.67228851 | ↑ |
| 11(Z),14(Z),17(Z)-Eicosatrienoic acid | C20 H34 O2 | 306.25583 | 6.886 | 307.26303 | 0.419516502 | 0.000360818 | 1.518360685 | ↓ |
| 20-Carboxy-Leukotriene B4 | C20 H30 O6 | 366.20323 | 7.112 | 367.21051 | 3.208227301 | 0.00040053 | 1.877759279 | ↑ |
| (S)-Equol | C15 H14 O3 | 242.09436 | 1.339 | 243.10164 | 1.854721843 | 0.000422659 | 1.620447571 | ↑ |
| Norfloxacin | C16 H18 F N3 O3 | 319.13776 | 1.402 | 320.14508 | 0.522616959 | 0.000423601 | 1.515840756 | ↓ |
| 4-Ethoxybenzaldehyde | C9 H10 O2 | 150.06896 | 6.174 | 151.07623 | 1.951278146 | 0.000429956 | 1.468353826 | ↑ |
| 6??-Hydroxytestosterone | C19 H28 O3 | 304.20343 | 7.667 | 305.21033 | 0.609037304 | 0.000444102 | 1.371623476 | ↓ |
| 5α-Dihydrotestosterone | C19 H30 O2 | 290.22427 | 8.062 | 291.23196 | 0.583294659 | 0.000448115 | 1.542430709 | ↓ |
| D-Carnitine | C7 H15 N O3 | 161.10505 | 6.546 | 162.11205 | 2.218621156 | 0.000479956 | 1.279692054 | ↑ |
| Quinine | C20 H24 N2 O2 | 324.17763 | 6.212 | 325.18491 | 1.727517232 | 0.000495667 | 1.513576581 | ↑ |
| Monoolein | C21 H40 O4 | 356.29223 | 9.842 | 357.29922 | 0.077295049 | 0.000510111 | 1.498753481 | ↓ |
| Lysopc 18:2 | C26 H50 N O7 P | 519.33251 | 7.256 | 520.3399 | 0.580801266 | 0.000522604 | 1.416668995 | ↓ |
| Threitol | C4 H10 O4 | 122.04794 | 1.426 | 123.0552 | 2.424313566 | 0.000585511 | 1.711557168 | ↑ |
| Coniferin | C16 H22 O8 | 364.11175 | 1.366 | 347.10864 | 1.848836076 | 0.000708945 | 1.410859551 | ↑ |
| Isotretinoin | C20 H28 O2 | 300.20847 | 8.03 | 301.21512 | 0.588967705 | 0.000789819 | 1.494124838 | ↓ |
| 3-Ureidopropionic acid | C4 H8 N2 O3 | 132.0535 | 1.742 | 115.05014 | 0.605637396 | 0.000869057 | 1.475121944 | ↓ |
| Ascorbyl palmitate | C22 H38 O7 | 431.28791 | 5.485 | 432.29538 | 5.139998574 | 0.000884839 | 1.623013348 | ↑ |
| Milbemycin A4 oxime | C32 H45 N O7 | 537.31267 | 10.464 | 538.31995 | 2.452490459 | 0.001062366 | 1.370370056 | ↑ |
| Dihydrocapsaicin | C18 H29 N O3 | 307.2147 | 6.967 | 308.22192 | 0.208560621 | 0.001082262 | 1.512975082 | ↓ |
| Kahweol | C20 H26 O3 | 314.18781 | 7.077 | 315.19482 | 1.54305263 | 0.001085932 | 1.340011254 | ↑ |
| N8-Acetylspermidine | C9 H21 N3 O | 187.1685 | 1.312 | 188.17569 | 0.45922838 | 0.001102777 | 1.330636716 | ↓ |
| 19(R)-HETE | C20 H32 O3 | 302.22418 | 6.943 | 303.23129 | 0.315057227 | 0.001133401 | 1.370618777 | ↓ |
| 1-Aminocyclohexanecarboxylic acid | C7 H13 N O2 | 143.09472 | 2.655 | 144.10205 | 0.513531555 | 0.001153979 | 1.185608594 | ↓ |
| Lysopg 18:1 | C24 H47 O9 P | 510.29783 | 8.009 | 511.30527 | 0.532913782 | 0.001176026 | 1.498973717 | ↓ |
| Nicotinuric acid | C8 H8 N2 O3 | 180.05342 | 2.137 | 181.0607 | 9.508956846 | 0.00124345 | 1.641674761 | ↑ |
| Biliverdin | C33 H34 N4 O6 | 582.24714 | 6.207 | 583.25488 | 2.279702114 | 0.001336142 | 1.356220098 | ↑ |
| Cytidine 5'-Monophosphate-N-Acetylneuraminic Acid | C20 H30 N4 Na O16 P | 636.13091 | 5.804 | 637.13818 | 3.82253621 | 0.001347723 | 1.564248222 | ↑ |
| Lysopa 16:0 | C19 H39 O7 P | 410.24258 | 6.969 | 411.24954 | 0.622666992 | 0.001485493 | 1.36984254 | ↓ |
| Glycolithocholic acid | C26 H43 N O4 | 433.31932 | 6.606 | 434.32672 | 0.598474019 | 0.001517696 | 1.268007245 | ↓ |
| L-Alanyl-L-Lysine | C9 H19 N3 O3 | 217.14268 | 1.426 | 218.15018 | 0.524960339 | 0.00153139 | 1.350049203 | ↓ |
| Progesterone | C21 H30 O2 | 314.22424 | 7.198 | 315.23175 | 0.421376127 | 0.001549009 | 1.37566488 | ↓ |
| Adenine | C5 H5 N5 | 135.05447 | 1.522 | 136.06171 | 0.60833928 | 0.001583729 | 1.256939787 | ↓ |
| Dithranol | C14 H10 O3 | 226.06306 | 5.393 | 227.07037 | 2.076772008 | 0.001621635 | 1.551298373 | ↑ |
| 1-Oleoyl-Sn-Glycero-3-Phosphocholine | C26 H52 N O7 P | 521.35045 | 8.147 | 522.35699 | 0.381045971 | 0.001656192 | 1.42197594 | ↓ |
| Oxymorphone | C17 H19 N O4 | 301.12717 | 1.415 | 302.13434 | 0.584206975 | 0.001960372 | 1.3164967 | ↓ |
| Nandrolone | C18 H26 O2 | 274.19298 | 8.042 | 275.20071 | 0.631847313 | 0.002015876 | 1.41447248 | ↓ |
| Cholecalciferol | C27 H44 O | 384.34011 | 8.15 | 385.34717 | 1.707612856 | 0.002030079 | 1.753068235 | ↑ |
| N epsilon,N epsilon,N epsilon-trimethyllysine | C9 H20 N2 O2 | 188.15251 | 3.536 | 189.15979 | 0.150513327 | 0.002092448 | 1.076383112 | ↓ |
| Neosaxitoxin | C10 H17 N7 O5 | 297.1212 | 5.083 | 298.12872 | 0.651689414 | 0.002391024 | 1.312278693 | ↓ |
| L-2,4-Diaminobutyric acid | C4 H10 N2 O2 | 118.07618 | 1.934 | 119.08349 | 0.477489417 | 0.002432352 | 1.323655109 | ↓ |
| 4-Guanidinobutyric acid | C5 H11 N3 O2 | 145.08506 | 1.448 | 146.09203 | 4.602446031 | 0.002566549 | 1.478931775 | ↑ |
| Menaquinone | C31 H40 O2 | 444.30178 | 6.832 | 445.30841 | 10.56344965 | 0.002595209 | 1.342132174 | ↑ |
| Nicotinic acid mononucleotide | C11 H14 N O9 P | 335.0406 | 1.459 | 336.04742 | 0.231600557 | 0.002816785 | 1.296138089 | ↓ |
| α-Aspartylphenylalanine | C13 H16 N2 O5 | 280.10581 | 4.826 | 281.11282 | 0.516804093 | 0.002827784 | 1.222443829 | ↓ |
| Pyrrole-2-carboxylic acid | C5 H5 N O2 | 111.03209 | 1.374 | 129.06596 | 10.39782104 | 0.002844563 | 1.432487053 | ↑ |
| Arachidonic acid methyl ester | C21 H34 O2 | 318.2562 | 7.178 | 319.26364 | 0.626788898 | 0.002872262 | 1.237813438 | ↓ |
| 4-Methoxybenzaldehyde | C8 H8 O2 | 136.05234 | 7.002 | 137.05975 | 0.445763694 | 0.00298609 | 1.289294608 | ↓ |
| N-Acetyl-S-allyl-L-cysteine | C8 H13 N O3 S | 203.06115 | 5.562 | 204.06839 | 0.653589796 | 0.003024588 | 1.058219277 | ↓ |
| Desoxycortone | C21 H30 O3 | 330.21851 | 8.48 | 331.22583 | 2.154004192 | 0.003599093 | 1.248070407 | ↑ |
| ACar 14:3 | C21 H36 N O4 | 365.25638 | 6.247 | 366.26376 | 2.278296771 | 0.003610711 | 1.450159961 | ↑ |
| N1-Acetylspermine | C12 H28 N4 O | 122.11321 | 1.291 | 123.12048 | 0.38861432 | 0.003825468 | 1.27072791 | ↓ |
| Dihydrothymine | C5 H8 N2 O2 | 128.05853 | 3.1 | 129.06592 | 0.328906072 | 0.004042075 | 1.332326699 | ↓ |
| Phosphocholine | C5 H15 Cl N O4 P | 219.04254 | 1.152 | 220.05003 | 0.608737391 | 0.004478056 | 1.335739383 | ↓ |
| allantoate | C4 H8 N4 O4 | 176.05459 | 1.375 | 177.0618 | 3.986669028 | 0.004710465 | 1.349791676 | ↑ |
| ACar 20:3 | C27 H48 N O4 | 449.34975 | 7.124 | 450.35672 | 3.109042597 | 0.0048068 | 1.276118744 | ↑ |
| Diisobutylphthalate | C16 H22 O4 | 278.14995 | 6.721 | 279.15723 | 0.578406726 | 0.005339665 | 1.178058501 | ↓ |
| 5-Hydroxyindole-3-acetic acid | C10 H9 N O3 | 191.05797 | 5.182 | 192.06514 | 0.581370807 | 0.00539508 | 1.306153499 | ↓ |
| cAMP | C10 H12 N5 O6 P | 329.05328 | 6.884 | 330.06064 | 0.441345105 | 0.005558391 | 1.124709805 | ↓ |
| (3-Methoxy-4-hydroxyphenyl)ethylene glycol sulfate | C9 H12 O7 S | 264.0302 | 1.457 | 265.03745 | 2.519963611 | 0.005839573 | 1.252738781 | ↑ |
| Vitamin A | C20 H30 O | 286.22926 | 7.251 | 287.23639 | 0.613146746 | 0.006716404 | 1.352537505 | ↓ |
| D-(+)-Maltose | C12 H22 O11 | 364.09794 | 1.365 | 365.10486 | 2.157428058 | 0.006991091 | 1.15826935 | ↑ |
| 2-Phenylglycine | C8 H9 N O2 | 151.06315 | 4.955 | 152.07037 | 0.336220102 | 0.007031935 | 1.156017788 | ↓ |
| N-Methylphenylalanine | C10 H13 N O2 | 179.09441 | 4.998 | 180.10175 | 0.410123655 | 0.007279893 | 1.120702752 | ↓ |
| 5-Phenylvaleric Acid | C11 H14 O2 | 178.09922 | 6.548 | 179.10625 | 1.776731959 | 0.007604902 | 1.207722745 | ↑ |
| ACar 16:4 | C23 H38 N O4 | 369.28983 | 6.48 | 392.27905 | 4.731779379 | 0.007630846 | 1.155219806 | ↑ |
| 3-Hydroxyproline | C5 H9 N O3 | 131.05823 | 5.069 | 132.06555 | 0.381585636 | 0.007792474 | 1.175251553 | ↓ |
| D-Glucosamine 6-phosphate | C6 H14 N O8 P | 259.04579 | 1.386 | 260.05283 | 0.636364763 | 0.008285283 | 1.104592428 | ↓ |
| Homosildenafil | C23 H32 N6 O4 S | 488.21433 | 5.282 | 489.22156 | 0.445238234 | 0.008417561 | 1.170395034 | ↓ |
| Chlorindione | C15 H9 Cl O2 | 256.02884 | 1.36 | 257.03601 | 1.525090007 | 0.008460521 | 1.19217547 | ↑ |
| Hydroxyhomosildenafil | C23 H32 N6 O5 S | 504.21849 | 4.785 | 505.2258 | 0.171180991 | 0.008566328 | 1.561965414 | ↓ |
| Jasmonic acid | C12 H18 O3 | 210.12561 | 6.863 | 211.13277 | 0.342275444 | 0.008649016 | 1.307495595 | ↓ |
| PC (9:0/9:0) | C26 H52 N O8 P | 537.34551 | 7.324 | 538.35236 | 0.510381108 | 0.009400026 | 1.1698726 | ↓ |
| 17α-Ethynylestradiol | C20 H24 O2 | 314.18828 | 8.107 | 315.19519 | 1.788636407 | 0.009482944 | 1.284258223 | ↑ |
| DL-Glutamine | C5 H10 N2 O3 | 146.06905 | 1.356 | 147.07648 | 1.566903755 | 0.010351656 | 1.200464047 | ↑ |
| U-44069 | C21 H34 O4 | 332.23471 | 8.156 | 333.24249 | 0.403677722 | 0.010556815 | 1.205087573 | ↓ |
| DL-3-Aminoisobutyric acid | C4 H9 N O2 | 103.06339 | 1.777 | 104.07075 | 0.455679984 | 0.010755025 | 1.029416172 | ↓ |
| Ginsenoside Rg3 | C42 H72 O13 | 766.48534 | 7.09 | 767.49152 | 1.989655161 | 0.010988717 | 1.099288088 | ↑ |
| 2-Deoxyuridine | C9 H12 N2 O5 | 228.07457 | 1.44 | 229.08205 | 0.571818648 | 0.012472983 | 1.125407486 | ↓ |
| D-Sphingosine | C18 H37 N O2 | 299.28223 | 6.82 | 300.28955 | 0.465894867 | 0.012610763 | 1.12590546 | ↓ |
| Ala-Ile | C9 H18 N2 O3 | 202.13174 | 5.096 | 203.13898 | 0.498587509 | 0.012614451 | 1.105663079 | ↓ |
| Thymol | C10 H14 O | 150.10425 | 8.168 | 151.11183 | 0.493059886 | 0.012786766 | 1.247998692 | ↓ |
| (-)-Caryophyllene oxide | C15 H24 O | 220.18265 | 8.185 | 221.18965 | 0.483110566 | 0.013508367 | 1.231482296 | ↓ |
| nor-6α-Οxycodol | C17 H21 N O4 | 303.14292 | 1.846 | 304.15005 | 0.6004515 | 0.013899914 | 1.194462053 | ↓ |
| Carbendazim | C9 H9 N3 O2 | 191.06943 | 5.216 | 192.07672 | 0.275970274 | 0.013903432 | 1.045045698 | ↓ |
| Histamine | C5 H9 N3 | 111.07967 | 1.243 | 112.08678 | 0.339108012 | 0.013948285 | 1.053707936 | ↓ |
| PC (16:1e/2:0) | C26 H52 N O7 P | 521.34802 | 9.559 | 522.35583 | 0.182219169 | 0.014096173 | 1.098443549 | ↓ |
| L-Prolinamide | C5 H10 N2 O | 132.09189 | 1.575 | 133.09906 | 0.608752812 | 0.014916609 | 1.268778439 | ↓ |
| D-Fructose 1,6-bisphosphate | C6 H14 O12 P2 | 339.99569 | 1.543 | 341.00293 | 0.609592078 | 0.015138289 | 1.286448365 | ↓ |
| Ecgonine | C9 H15 N O3 | 185.10798 | 1.575 | 186.11519 | 0.397358887 | 0.015604724 | 1.381453192 | ↓ |
| Glycerol 1-hexadecanoate | C19 H38 O4 | 330.2768 | 8.112 | 331.28448 | 0.641643176 | 0.015870935 | 1.105381506 | ↓ |
| 4-Phenyl-3-buten-2-one | C10 H10 O | 146.073 | 6.462 | 147.07999 | 0.252210388 | 0.015908054 | 1.029265501 | ↓ |
| Carbaprostacyclin | C21 H34 O4 | 332.23456 | 7.318 | 333.24219 | 0.642136196 | 0.016023076 | 1.121694388 | ↓ |
| N-Carbamyl-L-glutamicacid | C6 H10 N2 O5 | 190.05888 | 1.353 | 191.06606 | 3.541645949 | 0.016080763 | 1.176795536 | ↑ |
| (+)-Aphidicolin | C20 H34 O4 | 360.22955 | 8.078 | 361.23697 | 0.666454402 | 0.016698293 | 1.281828836 | ↓ |
| Cardamomin | C16 H14 O4 | 270.08886 | 7.1 | 271.09613 | 3.034852932 | 0.017012549 | 1.10034377 | ↑ |
| Caprolactam | C6 H11 N O | 113.08406 | 1.429 | 114.09131 | 1.672310213 | 0.017186201 | 1.27578734 | ↑ |
| ACar 4:0 | C11 H22 N O4 | 231.14692 | 4.986 | 232.15436 | 3.089234735 | 0.017312792 | 1.137731209 | ↑ |
| Capsaicin | C18 H27 N O3 | 323.20884 | 6.689 | 324.21582 | 0.246804055 | 0.01820599 | 1.059719782 | ↓ |
| C-8 Ceramide-1-phosphate | C26 H52 N O6 P | 523.35795 | 7.909 | 524.36572 | 0.54042767 | 0.018730993 | 1.148124739 | ↓ |
| Maltol | C6 H6 O3 | 126.03163 | 5.26 | 127.03909 | 0.646689261 | 0.019613447 | 1.075119614 | ↓ |
| Asparagine | C4 H8 N2 O3 | 132.05345 | 1.389 | 133.06055 | 1.730483412 | 0.020464403 | 1.131785136 | ↑ |
| Acetyl-L-carnitine | C9 H17 N O4 | 203.11585 | 1.448 | 204.12331 | 2.849418688 | 0.023810809 | 1.150670099 | ↑ |
| Nicotinic acid | C6 H5 N O2 | 123.03206 | 1.459 | 124.03925 | 1.731984706 | 0.0239104 | 1.20955942 | ↑ |
| Betulin | C30 H50 O2 | 442.37993 | 7.093 | 443.38715 | 3.218549742 | 0.026808854 | 1.022177536 | ↑ |
| Leukotriene E4 | C23 H37 N O5 S | 439.23916 | 5.731 | 440.24646 | 1.816536956 | 0.029503191 | 1.021115376 | ↑ |
| Prolylleucine | C11 H20 N2 O3 | 228.15051 | 1.573 | 229.15776 | 0.220777436 | 0.032351464 | 1.268731129 | ↓ |
| 5-Hydroxytryptophol | C10 H11 N O2 | 177.07914 | 1.45 | 178.08644 | 0.513822025 | 0.033846671 | 1.04130965 | ↓ |
| Theobromine | C7 H8 N4 O2 | 180.06441 | 4.114 | 181.07169 | 3.959669036 | 0.037093045 | 1.069450527 | ↑ |
| Nobiletin | C21 H22 O8 | 402.13199 | 6.45 | 403.13907 | 2.608254436 | 0.037735829 | 1.482231627 | ↑ |
| N-Acetylputrescine | C6 H14 N2 O | 130.1106 | 1.432 | 131.11784 | 1.605931527 | 0.03902456 | 1.054702248 | ↑ |
| N-Acetyl-L-methionine | C7 H13 N O3 S | 191.06124 | 5.241 | 192.06851 | 0.501026516 | 0.043304312 | 1.02301848 | ↓ |
| Hydroxyprogesterone caproate | C27 H40 O4 | 428.29254 | 8.007 | 429.29987 | 0.446314046 | 0.044292452 | 1.010402245 | ↓ |
| β-Nicotinamide mononucleotide | C11 H15 N2 O8 P | 334.05679 | 1.438 | 335.064 | 0.424225118 | 0.047921265 | 1.015308758 | ↓ |

Abbreviations: RT, retention time; m/z, mass-to-charge ratio; FC, fold change; VIP, variable important in projection; ↑, up-regulated; ↓, down-regulated

Supplementary Table S3: Differential metabolites between ATB and HC

| Name | Formula | Molecular Weight | RT [min] | m/z | FC | Pvalue | VIP | Trend (based on HC) |
| --- | --- | --- | --- | --- | --- | --- | --- | --- |
| Prostaglandin E2 | C20 H32 O5 | 388.20001 | 6.181 | 387.19284 | 493.7920629 | 8.06E-12 | 2.313917991 | ↑ |
| Indole-3-carboxaldehyde | C9 H7 N O | 145.05313 | 5.727 | 144.04585 | 0.264488785 | 8.89E-12 | 2.013969728 | ↓ |
| N-(4-chlorophenyl)-N'-cyclohexylthiourea | C13 H17 Cl N2 S | 268.08103 | 4.444 | 267.07382 | 0.034475814 | 2.11E-11 | 2.147625546 | ↓ |
| Gly-Tyr | C11 H14 N2 O4 | 238.09569 | 3.949 | 237.08849 | 0.324556172 | 2.25E-11 | 1.994872378 | ↓ |
| 5-Methoxyuridine | C10 H14 N2 O7 | 236.12546 | 3.967 | 273.07364 | 0.273210887 | 1.04E-10 | 1.987552019 | ↓ |
| Xanthosine | C10 H12 N4 O6 | 284.0759 | 3.549 | 283.06854 | 0.097811594 | 1.45E-10 | 1.921802901 | ↓ |
| Hypoxanthine | C5 H4 N4 O | 136.03882 | 1.934 | 135.03149 | 0.271101296 | 1.75E-10 | 1.97387644 | ↓ |
| Lysopc 16:1 | C24 H48 N O7 P | 493.3192 | 8.121 | 492.31192 | 0.335439813 | 2.33E-10 | 1.548730297 | ↓ |
| Bicyclo Prostaglandin E2 | C20 H30 O4 | 370.19969 | 6.015 | 369.1926 | 0.305097243 | 2.40E-10 | 1.852013103 | ↓ |
| LysoPC 12:1 | C20 H36 N O7 P | 433.22111 | 6.047 | 432.21384 | 0.119657791 | 3.18E-10 | 1.936771375 | ↓ |
| Gly-Tyr-Ala | C14 H19 N3 O5 | 309.1329 | 5.188 | 308.12546 | 0.437556583 | 6.91E-10 | 1.79407502 | ↓ |
| (5-L-Glutamyl)-L-Amino Acid | C8 H14 N2 O5 | 218.09053 | 1.441 | 217.08328 | 0.330825945 | 8.43E-10 | 1.858309216 | ↓ |
| N-Acetyl-Asp-Glu | C11 H16 N2 O8 | 304.09089 | 3.989 | 303.08359 | 0.231668001 | 1.08E-09 | 1.883078097 | ↓ |
| 5-Methyluridine | C10 H15 N3 O5 | 258.08551 | 4.028 | 257.07819 | 0.263705677 | 2.27E-09 | 1.791009959 | ↓ |
| Deoxycholic Acid | C24 H40 O4 | 392.29263 | 7.225 | 391.28543 | 0.186892017 | 2.35E-09 | 1.795262403 | ↓ |
| Kynurenic acid | C10 H7 N O3 | 189.0431 | 5.407 | 188.0356 | 0.285327755 | 2.69E-09 | 1.816756208 | ↓ |
| LPE 12:0 | C17 H36 N O7 P | 397.22306 | 7.57 | 396.21561 | 0.447744328 | 2.78E-09 | 1.657588419 | ↓ |
| 4-Thiouridine | C9 H12 N2 O5 S | 260.04714 | 4.821 | 259.04007 | 0.445308928 | 3.91E-09 | 1.792128234 | ↓ |
| N-acetyl-D-glucosamine | C8 H15 N O6 | 221.09026 | 1.394 | 220.08284 | 0.452650913 | 4.01E-09 | 1.89786878 | ↓ |
| Spiculisporic Acid | C17 H28 O6 | 328.18894 | 6.306 | 327.18152 | 0.355454783 | 4.43E-09 | 1.562122539 | ↓ |
| 2'-Deoxyadenosine 5'-monophosphate | C10 H14 N5 O6 P | 331.0683 | 1.899 | 330.06104 | 0.0814189 | 5.61E-09 | 1.809034881 | ↓ |
| 13,14-dihydro Prostaglandin E1 | C20 H36 O5 | 356.25678 | 8.369 | 355.24942 | 0.297626839 | 5.66E-09 | 1.758904067 | ↓ |
| 2,6-Dihydroxypurine | C5 H4 N4 O2 | 152.03375 | 4.713 | 151.02647 | 0.191655251 | 6.39E-09 | 1.905512886 | ↓ |
| N-acetyl-L-ornithine | C7 H14 N2 O3 | 174.1009 | 2.001 | 173.09363 | 0.364754713 | 7.06E-09 | 1.855657101 | ↓ |
| D-Mannose 6-phosphate | C6 H13 O9 P | 260.02995 | 1.25 | 259.02249 | 0.075398214 | 9.19E-09 | 1.810762528 | ↓ |
| Tetrahydroaldosterone | C21 H32 O5 | 364.22542 | 7.108 | 363.21799 | 0.347446374 | 1.10E-08 | 1.702885551 | ↓ |
| 13,14-dihydro-15-keto-tetranor Prostaglandin E2 | C16 H26 O5 | 298.17843 | 6.054 | 297.17087 | 0.265267701 | 1.36E-08 | 1.726162723 | ↓ |
| LPC 20:4 | C28 H50 N O7 P | 589.33811 | 8.922 | 588.33118 | 0.355539667 | 1.50E-08 | 1.709560898 | ↓ |
| Prostaglandin F2alpha | C20 H34 O5 | 354.2411 | 7.437 | 353.23383 | 0.396910862 | 1.62E-08 | 1.708002129 | ↓ |
| 3-[(methoxycarbonyl)amino]-2,2,3-trimethylbutanoic acid | C9 H17 N O4 | 203.11617 | 5.708 | 202.10889 | 0.107610509 | 1.63E-08 | 1.78534528 | ↓ |
| Nonanoic acid | C9 H18 O2 | 158.13103 | 6.026 | 157.12373 | 0.395433413 | 2.03E-08 | 1.733062124 | ↓ |
| LPE 16:1 | C21 H42 N O7 P | 451.27027 | 9.02 | 450.263 | 0.12273053 | 2.24E-08 | 1.809689796 | ↓ |
| 3-Phosphoglyceric acid | C3 H7 O7 P | 185.9933 | 1.563 | 184.98607 | 0.384838845 | 2.54E-08 | 1.715695855 | ↓ |
| 12-oxo Phytodienoic Acid | C18 H28 O3 | 292.20425 | 7.097 | 291.19672 | 0.270736434 | 2.93E-08 | 1.609655616 | ↓ |
| Dodecanedioic acid | C12 H22 O4 | 230.15199 | 6.431 | 229.14459 | 0.205743599 | 3.97E-08 | 1.721103646 | ↓ |
| Stercobilin | C33 H46 N4 O6 | 594.33321 | 5.532 | 593.32635 | 0.098737299 | 5.14E-08 | 1.629736626 | ↓ |
| Guanosine-3',5'-cyclic monophosphate | C10 H12 N5 O7 P | 345.04785 | 2.671 | 344.04062 | 0.186358015 | 5.69E-08 | 1.78358241 | ↓ |
| 2,3-Dinor-TXB2 | C18 H30 O6 | 342.20369 | 5.449 | 341.19705 | 0.236712591 | 6.45E-08 | 1.712265458 | ↓ |
| dUMP | C9 H13 N2 O8 P | 308.0419 | 1.526 | 307.0351 | 0.276992294 | 6.83E-08 | 1.686458104 | ↓ |
| LPE 15:1 | C20 H40 N O7 P | 437.2546 | 8.587 | 436.24707 | 0.166145254 | 7.21E-08 | 1.534798817 | ↓ |
| Thymidine | C10 H14 N2 O5 | 242.09058 | 4.891 | 241.08318 | 0.229560402 | 7.56E-08 | 1.653974498 | ↓ |
| N'2-acetylpyridine-2-carbohydrazide | C8 H9 N3 O2 | 179.06978 | 1.746 | 178.06248 | 11.84572024 | 7.60E-08 | 1.843517069 | ↑ |
| O-Aceyl-L-Serine | C5 H9 N O4 | 147.05346 | 5.084 | 146.04607 | 0.352293572 | 8.22E-08 | 1.608237786 | ↓ |
| Tropolone | C7 H6 O2 | 122.03712 | 6.554 | 121.02985 | 0.636490792 | 1.05E-07 | 1.446599828 | ↓ |
| 2-Hydroxymyristic acid | C14 H28 O3 | 198.19866 | 8.603 | 197.19119 | 0.319102706 | 1.32E-07 | 1.545538826 | ↓ |
| Guanosine | C10 H13 N5 O5 | 283.09173 | 2.425 | 282.08435 | 0.219402432 | 1.65E-07 | 1.792535831 | ↓ |
| Mag (18:1) | C21 H40 O4 | 356.29252 | 7.735 | 355.28525 | 0.378341497 | 1.75E-07 | 1.689423808 | ↓ |
| Gly-Val | C7 H14 N2 O3 | 174.1008 | 2.835 | 173.09351 | 0.374723723 | 1.83E-07 | 1.511485343 | ↓ |
| 3-Methoxytyramine | C9 H13 N O2 | 167.09511 | 5.388 | 166.08748 | 0.526919833 | 1.83E-07 | 1.556438425 | ↓ |
| Inosine | C10 H12 N4 O5 | 268.08089 | 3.143 | 267.07358 | 0.211590781 | 1.99E-07 | 1.671349326 | ↓ |
| 13,14-dihydro-15-keto-tetranor Prostaglandin D2 | C16 H26 O5 | 280.16771 | 6.094 | 279.16034 | 0.057796686 | 2.03E-07 | 1.748276084 | ↓ |
| N-{3-[(3,5-difluorobenzyl)oxy]pyridin-2-yl}-4-pentylbenzenesulfonamide | C23 H24 F2 N2 O3 S | 446.14373 | 6.297 | 445.13632 | 14.71580704 | 2.21E-07 | 2.020574911 | ↑ |
| Tetradecanedioic acid | C14 H26 O4 | 258.18345 | 6.922 | 257.17615 | 0.303402865 | 3.16E-07 | 1.628964842 | ↓ |
| alpha-Benzylsuccinic acid | C11 H12 O4 | 208.07392 | 5.504 | 207.06642 | 0.430839015 | 3.32E-07 | 1.532300168 | ↓ |
| Isophorone | C9 H14 O | 138.10457 | 6.484 | 137.09755 | 0.155132336 | 3.70E-07 | 1.596106087 | ↓ |
| Xanthine | C5 H4 N4 O2 | 152.03367 | 1.878 | 151.02638 | 0.202835059 | 3.96E-07 | 1.625971528 | ↓ |
| 7-(1-pyrrolidinyl)pyrimido[4,5-d]pyrimidin-4-amine | C10 H12 N6 | 216.11115 | 2.256 | 215.10381 | 0.474992034 | 4.15E-07 | 1.679337143 | ↓ |
| Traumatic acid | C12 H20 O4 | 228.13652 | 5.839 | 227.12924 | 0.166384442 | 4.21E-07 | 1.694475297 | ↓ |
| N1-cyclohexyl-4-(4-fluorobenzyl)-1,4-diazepane-1-carbothioamide | C19 H28 F N3 S | 349.20077 | 5.495 | 348.19345 | 0.421049725 | 4.97E-07 | 1.629585584 | ↓ |
| 4-chloro-2-(1H-pyrazol-3-yl)phenol | C9 H7 Cl N2 O | 194.02527 | 3.471 | 193.01799 | 0.135721321 | 5.00E-07 | 1.374849625 | ↓ |
| 23-Norcholic acid | C23 H38 O5 | 394.27233 | 6.83 | 393.26505 | 0.46543743 | 5.08E-07 | 1.663392047 | ↓ |
| 2-(2-carboxy-2-methylpropyl)-4,6-dimethylbenzoic acid | C14 H18 O4 | 250.12093 | 5.936 | 249.11359 | 0.090138295 | 5.27E-07 | 1.592260426 | ↓ |
| 10-Hydroxydecanoic acid | C10 H20 O3 | 188.14161 | 6.161 | 187.13429 | 0.165868907 | 5.73E-07 | 1.590375342 | ↓ |
| (2-oxo-2,3-dihydro-1H-indol-3-yl)acetic acid | C10 H9 N O3 | 191.05854 | 5.53 | 190.05122 | 0.107401254 | 5.93E-07 | 1.529573602 | ↓ |
| 2-(acetylamino)-4-(methylthio)butanoic acid | C7 H13 N O3 S | 191.05867 | 5.203 | 236.05695 | 0.419030637 | 7.78E-07 | 1.531841065 | ↓ |
| N-(1-benzothiophen-3-yl)-N'-(1-benzyl-4-piperidinyl)urea | C21 H23 N3 O S | 365.15959 | 5.163 | 364.15237 | 0.41486677 | 7.80E-07 | 1.494792943 | ↓ |
| 20-hydroxy Leukotriene B4 | C20 H32 O5 | 370.23615 | 6.886 | 369.22861 | 0.505547941 | 8.91E-07 | 1.696650283 | ↓ |
| 9-(3-O-Methylpentofuranosyl)-1,9-dihydro-6H-purin-6-one | C11 H14 N4 O5 | 282.09684 | 4.918 | 281.0896 | 0.37345635 | 8.97E-07 | 1.674487196 | ↓ |
| D-Fructose 6-phosphate | C6 H13 O9 P | 260.02995 | 1.615 | 259.02267 | 0.138278057 | 8.97E-07 | 1.513529345 | ↓ |
| LPE 20:0 | C25 H52 N O7 P | 509.34825 | 10.9 | 508.34097 | 2.627732508 | 9.07E-07 | 1.377800067 | ↑ |
| Gly-Leu | C8 H16 N2 O3 | 188.11655 | 5.039 | 187.10924 | 0.393544628 | 1.05E-06 | 1.476818329 | ↓ |
| Nicotinate ribonucleoside | C11 H13 N O6 | 255.07489 | 5.179 | 254.06763 | 0.383713353 | 1.05E-06 | 1.530405455 | ↓ |
| N-Acetyl-α-D-glucosamine 1-phosphate | C8 H16 N O9 P | 301.05632 | 1.514 | 300.04901 | 0.285509265 | 1.07E-06 | 1.361320199 | ↓ |
| 2-[(carboxymethyl)(methyl)amino]-5-methoxybenzoic acid | C11 H13 N O5 | 239.07982 | 3.108 | 238.07257 | 0.287655096 | 1.11E-06 | 1.452654346 | ↓ |
| N'1-(2-chlorobenzoyl)-2-[(2-methyl-1H-indol-3-yl)thio]ethanohydrazide | C18 H16 Cl N3 O2 S | 373.06987 | 4.291 | 372.06259 | 0.264382217 | 1.11E-06 | 1.725736588 | ↓ |
| 2'-Deoxyinosine | C10 H12 N4 O4 | 252.08609 | 3.856 | 251.07875 | 0.13264786 | 1.13E-06 | 1.655172554 | ↓ |
| (±)9(10)-DiHOME | C18 H34 O4 | 314.24582 | 7.336 | 313.23862 | 0.356437067 | 1.15E-06 | 1.493819833 | ↓ |
| Cymarin | C30 H44 O9 | 548.2998 | 7.913 | 547.29236 | 8.067912023 | 1.23E-06 | 1.654408553 | ↑ |
| 4-Coumaric acid | C9 H8 O3 | 164.04755 | 5.572 | 163.04041 | 0.220240151 | 1.28E-06 | 1.545902153 | ↓ |
| NSI-189 | C22 H30 N4 O | 366.24101 | 7.792 | 365.23364 | 0.114962224 | 1.36E-06 | 1.539188455 | ↓ |
| 7-Hydroxy-3,4-dihydrocarbostyril | C9 H9 N O2 | 163.06364 | 5.357 | 162.05634 | 0.121907659 | 1.40E-06 | 1.38750127 | ↓ |
| Delta-Tridecalactone | C13 H24 O2 | 212.17801 | 6.617 | 211.17111 | 0.341732446 | 1.42E-06 | 1.559105694 | ↓ |
| Estrone | C18 H22 O2 | 316.16786 | 5.89 | 315.16049 | 0.042670736 | 1.44E-06 | 1.520445673 | ↓ |
| D-Mannitol 1-phosphate | C6 H15 O9 P | 262.04555 | 1.412 | 261.03793 | 0.423604825 | 1.59E-06 | 1.360054177 | ↓ |
| 3-(4-chlorophenyl)-5-(3-phenyl-1H-pyrazol-4-yl)-1,2,4-oxadiazole | C17 H11 Cl N4 O | 223.1213 | 4.992 | 222.11401 | 0.202424234 | 1.64E-06 | 1.356274391 | ↓ |
| 2-[6-(1H-benzo[d]imidazol-2-yl)-2-pyridyl]-1H-benzo[d]imidazole | C19 H13 N5 | 312.12454 | 5.901 | 311.11642 | 0.267085879 | 1.88E-06 | 1.512030761 | ↓ |
| L-Histidinol | C6 H11 N3 O | 141.09058 | 1.474 | 140.08328 | 0.327205486 | 1.99E-06 | 1.477249623 | ↓ |
| 3-(1,1,2,3,3,3-hexafluoropropyl)adamantane-1-carboxylic acid | C14 H16 F6 O2 | 330.11059 | 5.549 | 329.10321 | 0.24164699 | 2.00E-06 | 1.487017757 | ↓ |
| 6-(4-phenylpiperazino)hexanoic acid hydrochloride | C16 H24 N2 O2 | 276.18419 | 5.854 | 275.17676 | 0.217063674 | 2.12E-06 | 1.517496462 | ↓ |
| N7-Methylguanosine | C11 H17 N5 O5 | 299.12184 | 1.337 | 298.11447 | 0.386360962 | 2.21E-06 | 1.448508636 | ↓ |
| 1-(3-phenylpropanoyl)-4-piperidinecarboxylic acid | C15 H19 N O3 | 261.13286 | 3.96 | 260.12558 | 0.501907819 | 2.26E-06 | 1.482800092 | ↓ |
| Uridine monophosphate (UMP) | C9 H13 N2 O9 P | 324.03614 | 1.493 | 323.0289 | 0.313743622 | 2.27E-06 | 1.403178599 | ↓ |
| 2-Furoylglycine | C7 H7 N O4 | 169.03792 | 5.347 | 168.0307 | 0.418206298 | 2.80E-06 | 1.536008043 | ↓ |
| Lithocholic Acid | C24 H40 O3 | 376.29781 | 8.859 | 375.29071 | 0.37474103 | 2.91E-06 | 1.540410042 | ↓ |
| Choline bitartrate | C9 H19 N O7 | 253.1163 | 1.342 | 252.10921 | 0.388809673 | 3.06E-06 | 1.421171536 | ↓ |
| 5-Fluorouridine | C9 H11 F N2 O6 | 131.03046 | 1.471 | 130.02306 | 0.32088588 | 3.55E-06 | 1.706034403 | ↓ |
| (±)9-HpODE | C18 H32 O4 | 312.23029 | 6.821 | 311.22311 | 0.483284222 | 4.03E-06 | 1.531145905 | ↓ |
| LPA 22:5 | C25 H41 O7 P | 968.53122 | 6.573 | 483.25833 | 2.627546182 | 4.31E-06 | 1.539876235 | ↑ |
| Docosahexaenoyl Ethanolamide | C24 H37 N O2 | 417.29216 | 8.509 | 416.28488 | 0.345505166 | 4.32E-06 | 1.569772715 | ↓ |
| FAHFA (2:0/16:0) | C18 H34 O4 | 314.24591 | 10.212 | 313.23871 | 0.176754603 | 4.84E-06 | 1.426831761 | ↓ |
| Nonadecanoic acid | C19 H38 O2 | 298.28767 | 10.98 | 297.2804 | 2.209180754 | 4.95E-06 | 1.318395352 | ↑ |
| N'1-[1-(2-hydroxyphenyl)ethylidene]-3-methoxybenzene-1-carbohydrazide | C16 H16 N2 O3 | 284.11751 | 10.8 | 283.1102 | 2.029984589 | 5.33E-06 | 1.775241074 | ↑ |
| DL-o-Tyrosine | C9 H11 N O3 | 181.07427 | 5.93 | 180.06697 | 0.407415491 | 5.63E-06 | 1.358498936 | ↓ |
| LPE 16:2 | C21 H40 N O7 P | 449.25472 | 8.457 | 448.2475 | 0.313880023 | 5.79E-06 | 1.418129428 | ↓ |
| Methyl 3-indolyacetate | C11 H11 N O2 | 189.07955 | 5.469 | 188.07224 | 0.1775602 | 6.12E-06 | 1.511486608 | ↓ |
| Glycoursodeoxycholic acid | C26 H43 N O5 | 449.3226 | 7.124 | 448.31519 | 0.328407379 | 6.58E-06 | 1.440798776 | ↓ |
| 1-(4-methylphenyl)-3-(2-pyridylthio)pyrrolidine-2,5-dione | C16 H14 N2 O2 S | 299.07736 | 3.951 | 298.06998 | 0.355931908 | 7.23E-06 | 1.492969728 | ↓ |
| Prostaglandin E1 | C20 H34 O5 | 390.21593 | 6.322 | 389.20868 | 0.261508665 | 7.24E-06 | 1.445378533 | ↓ |
| LPE 13:0 | C18 H38 N O7 P | 411.23885 | 7.865 | 410.23166 | 0.308134264 | 7.32E-06 | 1.394273278 | ↓ |
| tetranor-PGFM | C16 H26 O7 | 312.15742 | 5.53 | 311.15015 | 0.300467048 | 7.69E-06 | 1.345593425 | ↓ |
| Thioguanine | C5 H5 N5 S | 167.02656 | 2.149 | 379.05133 | 0.63521194 | 7.75E-06 | 1.468938576 | ↓ |
| Prostaglandin A3 | C20 H28 O4 | 664.39821 | 6.705 | 663.39093 | 13.4153288 | 8.45E-06 | 1.656643952 | ↑ |
| N-Acetylornithine | C7 H14 N2 O3 | 174.10081 | 1.47 | 173.09352 | 0.524765577 | 8.51E-06 | 1.440734921 | ↓ |
| Glycerol 3-phosphate | C3 H9 O6 P | 172.0141 | 1.516 | 171.00685 | 0.296980582 | 8.83E-06 | 1.351841498 | ↓ |
| 2-Hydroxy-1-(4-methoxyphenyl)propyl hexopyranoside | C16 H24 O8 | 344.14765 | 5.71 | 343.14008 | 0.29853787 | 9.56E-06 | 1.447947625 | ↓ |
| L-(-)-Malic acid | C4 H6 O5 | 134.02186 | 1.503 | 133.01457 | 0.357950695 | 1.03E-05 | 1.475957513 | ↓ |
| Adipic acid | C6 H10 O4 | 146.05831 | 5.315 | 145.05096 | 0.346221683 | 1.15E-05 | 1.419124553 | ↓ |
| DL-Malic acid | C4 H6 O5 | 134.02183 | 1.646 | 133.01454 | 0.378465852 | 1.21E-05 | 1.410267033 | ↓ |
| 6-chloro-2-methyl-4-[(2,3,4,5,6-pentamethylbenzyl)oxy]quinoline | C22 H24 Cl N O | 353.15941 | 4.816 | 352.15228 | 0.550282453 | 1.21E-05 | 1.30917246 | ↓ |
| Prolylglycine | C7 H12 N2 O3 | 172.0852 | 1.566 | 171.07793 | 0.517416252 | 1.24E-05 | 1.309336719 | ↓ |
| lipoamide | C8 H15 N O S2 | 205.05893 | 1.415 | 204.05176 | 2.085824171 | 1.29E-05 | 2.038804062 | ↑ |
| N1-[4-(trifluoromethyl)phenyl]-2-phenylbutanamide | C17 H16 F3 N O | 307.11972 | 3.946 | 306.11261 | 0.497856694 | 1.40E-05 | 1.337852715 | ↓ |
| 4-Toluic acid | C8 H8 O2 | 136.05274 | 5.623 | 135.04547 | 0.318170577 | 1.48E-05 | 1.479402143 | ↓ |
| Phe-Pro | C14 H18 N2 O3 | 262.13214 | 5.409 | 261.12488 | 0.498124377 | 1.57E-05 | 1.428948678 | ↓ |
| Uridine | C9 H12 N2 O6 | 244.06975 | 2.055 | 243.06245 | 0.393387946 | 1.64E-05 | 1.43236872 | ↓ |
| Adenosine 5'-monophosphate | C10 H14 N5 O7 P | 347.06257 | 1.956 | 346.0553 | 0.20990635 | 1.74E-05 | 1.410341004 | ↓ |
| 2'-Deoxycytidine 5'-monophosphate (dCMP) | C9 H14 N3 O7 P | 307.05711 | 1.463 | 306.0499 | 0.227144343 | 1.81E-05 | 1.280340785 | ↓ |
| D-Alanyl-D-alanine | C6 H12 N2 O3 | 160.0851 | 1.41 | 159.07791 | 0.5177667 | 2.18E-05 | 1.323407709 | ↓ |
| Hydrocortisone acetate | C23 H32 O6 | 404.22138 | 4.817 | 403.21381 | 0.527174476 | 2.19E-05 | 1.426894891 | ↓ |
| (±)11(12)-DiHET | C20 H34 O4 | 374.21665 | 2.486 | 373.20941 | 0.52145902 | 2.36E-05 | 1.257545457 | ↓ |
| 5-Hydroxyindole-2-carboxylic acid | C9 H7 N O3 | 177.04283 | 2.415 | 176.03505 | 3.42202131 | 2.41E-05 | 1.29334335 | ↑ |
| Glycodeoxycholic Acid (hydrate) | C26 H43 N O5 | 449.31454 | 7.454 | 448.30722 | 0.235912737 | 2.68E-05 | 1.677084087 | ↓ |
| 5-Hydroxytryptophan | C11 H12 N2 O3 | 220.08525 | 5 | 219.07784 | 0.483834121 | 2.68E-05 | 1.358768397 | ↓ |
| 2-Propylglutaric acid | C8 H14 O4 | 174.0895 | 5.896 | 173.08229 | 0.359226803 | 2.77E-05 | 1.350007179 | ↓ |
| LPE 17:2 | C22 H42 N O7 P | 463.27047 | 8.818 | 462.26294 | 0.17884997 | 2.95E-05 | 1.350544507 | ↓ |
| Thymidine 5'-monophosphate | C10 H15 N2 O8 P | 322.05687 | 2.514 | 321.04959 | 0.107989858 | 3.05E-05 | 1.322304523 | ↓ |
| 16-Hydroxyhexadecanoic acid | C16 H32 O3 | 272.23538 | 9.507 | 271.22812 | 0.373615544 | 3.21E-05 | 1.275750724 | ↓ |
| N1-(2-methyl-3-nitrophenyl)cyclohexane-1-carboxamide | C14 H18 N2 O3 | 131.06759 | 5.197 | 261.12808 | 0.168125235 | 3.38E-05 | 1.440497473 | ↓ |
| (R)-3-Hydroxy myristic acid | C14 H28 O3 | 244.20411 | 8.237 | 243.19679 | 0.493289399 | 4.31E-05 | 1.370934287 | ↓ |
| 5beta-Androstane-3,17-dione | C19 H28 O2 | 288.20923 | 7.326 | 287.20248 | 0.313544357 | 4.45E-05 | 1.353019903 | ↓ |
| 1-Methylguanosine | C11 H15 N5 O5 | 297.10629 | 1.423 | 296.09915 | 0.599707579 | 4.55E-05 | 1.344743425 | ↓ |
| o-Cresol | C7 H8 O | 108.0578 | 5.472 | 107.0504 | 0.489385286 | 4.78E-05 | 1.292145126 | ↓ |
| thiamine phosphate | C12 H18 Cl N4 O4 P S | 380.04872 | 1.477 | 379.04144 | 0.588110676 | 4.92E-05 | 1.412141232 | ↓ |
| trans-10-Heptadecenoic Acid | C17 H32 O2 | 268.24052 | 10.215 | 267.23322 | 0.248613323 | 4.94E-05 | 1.288522834 | ↓ |
| Glutaric acid | C5 H8 O4 | 132.04255 | 4.366 | 131.03514 | 0.360800795 | 4.96E-05 | 1.450351272 | ↓ |
| 2,6-dimethoxy-N-(1-methyl-1H-pyrazol-5-yl)benzamide | C13 H15 N3 O3 | 261.1119 | 5.239 | 260.10458 | 0.652999336 | 5.03E-05 | 1.359006172 | ↓ |
| L-Leucyl-L-alanine Hydrate | C9 H18 N2 O3 | 202.13233 | 4.821 | 201.12518 | 0.261045037 | 5.04E-05 | 1.572345039 | ↓ |
| N-Acetyl-D-galactosamine | C8 H15 N O6 | 267.09582 | 1.413 | 266.08963 | 0.606767157 | 5.30E-05 | 1.301113093 | ↓ |
| Ureidoisobutyric Acid | C5 H10 N2 O3 | 146.06955 | 1.492 | 145.06226 | 0.55503137 | 5.36E-05 | 1.311566326 | ↓ |
| Nicotinamide | C6 H6 N2 O | 122.04837 | 5.159 | 121.04108 | 0.571537265 | 5.71E-05 | 1.394672753 | ↓ |
| 1-(4-Methoxyphenyl)-2-propanone | C10 H12 O2 | 164.08412 | 5.688 | 209.08229 | 0.419798991 | 5.81E-05 | 1.247936525 | ↓ |
| tetranor-12(R)-HETE | C16 H26 O3 | 266.18845 | 6.568 | 265.18137 | 0.46087 | 6.08E-05 | 1.297599436 | ↓ |
| methyl 2-[(2-acetyl-3-oxo-1-butenyl)amino]acetate | C9 H13 N O4 | 199.08494 | 5.032 | 198.07756 | 0.577542718 | 6.21E-05 | 1.381261285 | ↓ |
| 8-iso-15-keto Prostaglandin E2 | C20 H30 O5 | 700.41946 | 6.482 | 699.41223 | 24.94043464 | 6.68E-05 | 1.522460149 | ↑ |
| 13,14-dihydro-15-keto-PGD2 | C20 H32 O5 | 352.22512 | 7.325 | 351.21747 | 0.323905517 | 6.68E-05 | 1.33793061 | ↓ |
| ethyl 1-cyclohexyl-4,5-dioxopyrrolidine-3-carboxylate | C13 H19 N O4 | 253.13191 | 5.723 | 252.12459 | 0.347531893 | 7.03E-05 | 1.268175177 | ↓ |
| Thymidine 5'-diphosphate | C10 H16 N2 O11 P2 | 402.02366 | 2.1 | 401.01639 | 0.551779179 | 7.06E-05 | 1.405482509 | ↓ |
| N-(4-isopropylphenyl)-N'-[2-(3-methyl-2-thienyl)vinyl]urea | C17 H20 N2 O S | 300.13257 | 4.017 | 299.12473 | 0.375705936 | 7.19E-05 | 1.284150103 | ↓ |
| 3-Hydroxysebacic acid | C10 H18 O5 | 218.11577 | 3.156 | 217.10849 | 0.032089923 | 7.40E-05 | 1.487844876 | ↓ |
| Chenodeoxycholic acid-3-beta-D-glucuronide | C30 H48 O10 | 568.32256 | 5.355 | 567.31525 | 0.395188946 | 7.55E-05 | 1.352570441 | ↓ |
| Methionine | C5 H11 N O2 S | 149.05137 | 1.905 | 148.04414 | 0.502813463 | 7.62E-05 | 1.257104819 | ↓ |
| DL-methionine sulfoxide | C5 H11 N O3 S | 165.04636 | 1.363 | 164.03903 | 4.615625849 | 7.84E-05 | 1.190610428 | ↑ |
| tetranor-PGDM | C16 H24 O7 | 310.14186 | 5.518 | 309.13443 | 0.543574384 | 7.93E-05 | 1.288063512 | ↓ |
| Threonine | C4 H9 N O3 | 119.05858 | 1.336 | 118.05125 | 0.443183909 | 8.11E-05 | 1.309509852 | ↓ |
| Lysopc 20:0 | C28 H58 N O7 P | 551.39383 | 8.973 | 550.38641 | 0.372419908 | 8.48E-05 | 1.354551411 | ↓ |
| ethyl 3-cyano-6-methyl-2-(phenylthio)isonicotinate | C16 H14 N2 O2 S | 298.08031 | 3.242 | 297.07303 | 0.569055504 | 8.61E-05 | 1.213712802 | ↓ |
| Asp-Phe methyl ester | C14 H18 N2 O5 | 294.12206 | 4.951 | 293.11469 | 0.205419827 | 8.78E-05 | 1.39219081 | ↓ |
| Tyrosylalanine | C12 H16 N2 O4 | 252.11141 | 2.873 | 251.10416 | 0.314217496 | 9.28E-05 | 1.234982741 | ↓ |
| trans-Ferulic acid | C10 H10 O4 | 194.05382 | 5.729 | 193.04654 | 0.645950397 | 9.32E-05 | 1.331739306 | ↓ |
| 2-Methylpentanedioic acid | C6 H10 O4 | 146.05835 | 5.848 | 145.05121 | 0.307829353 | 9.36E-05 | 1.423849066 | ↓ |
| 3-[4-methyl-1-(2-methylpropanoyl)-3-oxocyclohexyl]butanoic acid | C15 H24 O4 | 268.16899 | 6.053 | 267.1608 | 0.123563255 | 9.49E-05 | 1.31303492 | ↓ |
| N-Acetyl-D-tryptophan | C13 H14 N2 O3 | 246.101 | 5.876 | 245.09348 | 0.417006239 | 9.65E-05 | 1.146758031 | ↓ |
| 3-(3-Methoxyphenyl)propionic acid | C10 H12 O3 | 180.079 | 7.407 | 179.07172 | 0.240199881 | 0.000103712 | 1.331147326 | ↓ |
| Deoxyguanosine | C10 H13 N5 O4 | 267.097 | 3.845 | 266.08972 | 0.363457925 | 0.000105109 | 1.377436208 | ↓ |
| Dihydroorotic acid | C5 H6 N2 O4 | 158.03314 | 1.472 | 157.02586 | 0.295232959 | 0.000109637 | 1.356421032 | ↓ |
| 2'-Deoxyinosine 5'-monophosphate | C10 H13 N4 O7 P | 143.02394 | 1.966 | 331.04608 | 0.655520843 | 0.000110218 | 1.335853335 | ↓ |
| Deoxyribose 5-Phosphate | C5 H11 O7 P | 214.02459 | 1.4 | 213.01709 | 0.332846531 | 0.000111002 | 1.204743067 | ↓ |
| LysoPC 20:2 | C28 H54 N O7 P | 547.36308 | 7.629 | 1139.72437 | 0.062627743 | 0.000114763 | 1.476074903 | ↓ |
| 3-methyl-2-[(phenylsulfonyl)amino]butanoic acid | C11 H15 N O4 S | 257.07244 | 5.869 | 256.06519 | 0.428105076 | 0.000120564 | 1.2823427 | ↓ |
| LPC 20:0 | C28 H58 N O7 P | 597.40076 | 10.39 | 596.39368 | 2.416947811 | 0.000125841 | 1.117979847 | ↑ |
| gamma-Glutamylglutamic acid | C10 H16 N2 O7 | 276.09614 | 1.455 | 275.08887 | 0.641786775 | 0.000127139 | 1.179970316 | ↓ |
| 8(S),15(S)-DiHETE | C20 H32 O4 | 336.23052 | 6.843 | 335.22324 | 0.465316414 | 0.000129639 | 1.19718383 | ↓ |
| Homotaurine | C3 H9 N O3 S | 139.03076 | 1.36 | 138.02348 | 0.310534047 | 0.000136414 | 1.185126425 | ↓ |
| N1-(4-chlorophenyl)-3-(1H-pyrrol-1-ylmethyl)piperidine-1-carboxamide | C17 H20 Cl N3 O | 317.12672 | 5.386 | 316.11978 | 0.357723342 | 0.000136744 | 1.210959459 | ↓ |
| FAHFA (7:0/16:1) | C23 H42 O4 | 382.30842 | 7.867 | 381.30124 | 0.384702305 | 0.000147435 | 1.290192505 | ↓ |
| Corticosterone | C21 H30 O4 | 346.21816 | 7.409 | 345.21085 | 0.443207632 | 0.000147951 | 1.137157206 | ↓ |
| Modafinil acid | C15 H14 O3 S | 274.06294 | 5.207 | 273.05566 | 0.492110059 | 0.000150278 | 1.192582938 | ↓ |
| N-Acetylhistamine | C7 H11 N3 O | 153.09063 | 1.473 | 152.0833 | 0.191200328 | 0.000153944 | 1.190385497 | ↓ |
| N6-Acetyl-L-Lysine | C8 H16 N2 O3 | 188.11654 | 1.466 | 187.10931 | 0.551584506 | 0.000154256 | 1.320163565 | ↓ |
| LPE 15:0 | C20 H42 N O7 P | 439.27008 | 8.719 | 438.26303 | 0.200886492 | 0.000157527 | 1.278586628 | ↓ |
| L-(-)-Glyceric acid | C3 H6 O4 | 106.02683 | 1.444 | 105.01954 | 0.388427349 | 0.000157588 | 1.215844247 | ↓ |
| 1-methyl-N-(4-piperidinophenyl)-1H-imidazole-4-sulfonamide | C15 H20 N4 O2 S | 320.1294 | 7.125 | 319.12216 | 0.596260445 | 0.000157844 | 1.265728811 | ↓ |
| 2,5-di[4-(trifluoromethyl)benzylidene]cyclopentan-1-one | C21 H14 F6 O | 396.08835 | 5.677 | 395.08139 | 0.529968989 | 0.000166924 | 1.260870149 | ↓ |
| N1-(1,3-diphenyl-1H-pyrazol-5-yl)-2-chlorobenzamide | C22 H16 Cl N3 O | 373.10149 | 5.152 | 372.09421 | 0.495299786 | 0.000173595 | 1.329175117 | ↓ |
| Prostaglandin E3 | C20 H30 O5 | 386.18506 | 6.564 | 385.1777 | 0.262214537 | 0.000178708 | 1.307041531 | ↓ |
| Prostaglandin K1 | C20 H32 O5 | 334.2148 | 7.446 | 333.20749 | 0.213200838 | 0.00017881 | 1.301939986 | ↓ |
| 3,5-dimethyl-4H-pyrazol-4-one 4-(3,5-dichlorophenyl)hydrazone | C11 H10 Cl2 N4 | 268.02571 | 1.491 | 267.0184 | 0.184095054 | 0.000179284 | 1.254159496 | ↓ |
| 4-Phenylbutyric acid | C10 H12 O2 | 164.08412 | 5.885 | 163.07683 | 0.459726241 | 0.000195549 | 1.263732025 | ↓ |
| LPE 14:0 | C19 H40 N O7 P | 425.25459 | 8.408 | 424.24738 | 0.152896998 | 0.000195781 | 1.247896195 | ↓ |
| Pyridoxal 5'-phosphate hydrate | C8 H10 N O6 P | 247.02359 | 4.829 | 246.01631 | 0.42607775 | 0.000197044 | 1.133498555 | ↓ |
| N-(1,2,3,4-tetrahydro-1-naphthalenyl)benzenesulfonamide | C16 H17 N O2 S | 287.10079 | 5.097 | 286.09366 | 0.477182921 | 0.000200453 | 1.167469865 | ↓ |
| 3-[3-(beta-D-Glucopyranosyloxy)-2-hydroxyphenyl]propanoic acid | C15 H20 O9 | 344.11134 | 5.509 | 343.10403 | 0.102247192 | 0.000204733 | 1.27411297 | ↓ |
| L-Saccharopine | C11 H20 N2 O6 | 276.13251 | 1.464 | 275.12534 | 0.475311509 | 0.000205991 | 1.333260364 | ↓ |
| Oxaloacetate | C4 H4 O5 | 132.00629 | 1.531 | 130.99904 | 0.635491683 | 0.000207288 | 1.292646987 | ↓ |
| 2-deoxyglucose-6-phosphate | C6 H13 O8 P | 244.0351 | 1.491 | 243.02805 | 0.510520692 | 0.000212455 | 1.118399662 | ↓ |
| 3,5-Dihydroxybenzoic acid | C7 H6 O4 | 154.02444 | 4.408 | 199.02266 | 0.475665526 | 0.000224138 | 1.406084682 | ↓ |
| 13,14-dihydro-19(R)-hydroxy Prostaglandin E1 | C20 H36 O6 | 354.24125 | 6.188 | 353.23404 | 0.520951672 | 0.000224375 | 1.112291348 | ↓ |
| N1-tetrahydrofuran-2-ylmethyl-2-cyanoacetamide | C8 H12 N2 O2 | 168.09019 | 3.983 | 167.08293 | 0.567904019 | 0.000226516 | 1.202779885 | ↓ |
| α-D-Mannose 1-phosphate | C6 H13 O9 P | 260.02989 | 1.317 | 259.02261 | 0.389170287 | 0.000236704 | 1.178268909 | ↓ |
| Xanthorhamnin | C34 H42 O20 | 770.21626 | 5.006 | 769.20898 | 0.262147094 | 0.000237735 | 1.42530427 | ↓ |
| (±)10(11)-EpDPA | C22 H32 O3 | 344.23544 | 10.561 | 343.22818 | 2.030239356 | 0.00024672 | 1.13972161 | ↑ |
| Tyramine | C8 H11 N O | 137.08431 | 5.613 | 136.07697 | 0.6048937 | 0.000252923 | 1.205747166 | ↓ |
| Gamma-Glu-Leu | C11 H20 N2 O5 | 260.13748 | 1.459 | 259.12991 | 0.594316769 | 0.000253227 | 1.2875811 | ↓ |
| Folic acid | C19 H19 N7 O6 | 441.14 | 4.984 | 440.13257 | 0.493176819 | 0.000253547 | 1.223862053 | ↓ |
| 11-Deoxy prostaglandin F2β | C20 H34 O4 | 180.11375 | 5.455 | 359.22021 | 0.605103726 | 0.000258837 | 1.067901222 | ↓ |
| geranyl pp | C10 H20 O7 P2 | 314.06699 | 1.47 | 313.05991 | 0.557931681 | 0.00026277 | 1.201966118 | ↓ |
| Protectin D1 | C22 H32 O4 | 396.209 | 7.401 | 395.20172 | 0.360944828 | 0.000266562 | 1.282469546 | ↓ |
| 2,8-Quinolinediol | C9 H7 N O2 | 161.04799 | 4.593 | 160.04071 | 0.109246151 | 0.000284743 | 1.157486469 | ↓ |
| L-Tyrosinemethylester | C10 H13 N O3 | 195.08984 | 5.598 | 194.08247 | 0.444066238 | 0.000319125 | 1.19208009 | ↓ |
| Phosphopyruvic acid | C3 H5 O6 P | 167.98285 | 1.612 | 166.97552 | 0.375698703 | 0.00032882 | 1.139335902 | ↓ |
| HexCer-AP (t30:0/12:1) | C48 H93 N O10 | 889.68873 | 11.258 | 888.68146 | 1.872166961 | 0.000331551 | 1.071415865 | ↑ |
| 6-Methoxy-2-naphthoic acid | C12 H10 O3 | 202.06374 | 5.285 | 201.05649 | 0.451914206 | 0.000332118 | 1.177521672 | ↓ |
| 5-oxoproline | C5 H7 N O3 | 129.04295 | 5.37 | 128.03568 | 0.569534348 | 0.000333779 | 1.161625638 | ↓ |
| Farnesyl pyrophosphate | C15 H28 O7 P2 | 382.12966 | 5.727 | 381.12323 | 0.610597059 | 0.00033924 | 1.221683788 | ↓ |
| Hippuric acid | C9 H9 N O3 | 179.05856 | 4.389 | 178.05136 | 0.103240939 | 0.000350142 | 1.214957326 | ↓ |
| LPS 15:0 | C21 H42 N O9 P | 483.2593 | 11.88 | 482.25223 | 0.525242146 | 0.000351346 | 1.298738156 | ↓ |
| Cinnamoylglycine | C11 H11 N O3 | 205.07793 | 5.334 | 204.07063 | 0.194737187 | 0.000360761 | 1.243572157 | ↓ |
| 17α-Hydroxyprogesterone | C21 H30 O3 | 330.21547 | 5.432 | 329.20819 | 0.628306923 | 0.000362508 | 1.175149316 | ↓ |
| 5-OxoETE | C20 H30 O3 | 318.21877 | 7.873 | 317.21191 | 0.347754263 | 0.000373287 | 1.004176878 | ↓ |
| 3-(2-thienyl)-1,2,4-oxadiazole-5-carbohydrazide | C7 H6 N4 O2 S | 210.02015 | 1.55 | 209.01295 | 0.226306742 | 0.000390481 | 1.171751721 | ↓ |
| L-Asparagine | C4 H8 N2 O3 | 132.05363 | 5.337 | 131.04642 | 0.34430126 | 0.000418754 | 1.102994104 | ↓ |
| PA (8:0/18:2) | C29 H53 O8 P | 560.33919 | 9.884 | 559.3316 | 0.403082821 | 0.000422296 | 1.069527942 | ↓ |
| Octanoyl-coenzyme A | C29 H50 N7 O17 P3 S | 893.21374 | 4.856 | 892.20581 | 0.351343399 | 0.000432049 | 1.278045566 | ↓ |
| Abametapir | C12 H12 N2 | 184.10046 | 5.647 | 183.09323 | 0.562425466 | 0.000435323 | 1.31677159 | ↓ |
| Taurocholic acid | C26 H45 N O7 S | 515.29194 | 9.163 | 514.28467 | 7.943349147 | 0.000446681 | 1.26359796 | ↑ |
| LPE 18:1 | C23 H46 N O7 P | 479.30144 | 9.486 | 478.2944 | 0.078333202 | 0.000450415 | 1.099740263 | ↓ |
| Glycochenodeoxycholic Acid (sodium salt) | C26 H43 N O5 | 449.31428 | 8.529 | 448.3071 | 10.29703191 | 0.000506206 | 1.22179545 | ↑ |
| Valproic acid | C8 H16 O2 | 144.11531 | 5.851 | 143.10808 | 0.529906859 | 0.000509195 | 1.28937161 | ↓ |
| D-(+)-Galactose | C6 H12 O6 | 226.06919 | 1.334 | 225.0618 | 0.65828053 | 0.000513286 | 1.269626433 | ↓ |
| 17(S)-HpDHA | C22 H32 O4 | 360.23064 | 7.423 | 359.22342 | 0.335085179 | 0.000527868 | 1.192358927 | ↓ |
| Homogentisic Acid | C8 H8 O4 | 168.04268 | 5.324 | 167.03545 | 0.65030453 | 0.000542376 | 1.094570043 | ↓ |
| acetoacetate | C4 H6 O3 | 102.03192 | 5.187 | 101.02464 | 0.469625224 | 0.000543177 | 1.16624352 | ↓ |
| 2-(1H-1,2,3-benzotriazol-1-yl)-N-(2,3-dihydro-1H-inden-2-yl)acetamide | C17 H16 N4 O | 292.13477 | 6.245 | 291.1275 | 0.180987692 | 0.00056702 | 1.184331595 | ↓ |
| H-Gly-Pro-OH | C7 H12 N2 O3 | 172.08529 | 1.329 | 171.07808 | 0.361360555 | 0.000602544 | 1.188162843 | ↓ |
| 4-[2-(2-oxo-1-imidazolidinyl)ethyl]-1lambda~6~,4-thiazinane-1,1-dione | C9 H17 N3 O3 S | 248.1012 | 1.437 | 247.09389 | 0.641067631 | 0.000663174 | 1.124842103 | ↓ |
| HexCer-AP (t18:0/16:0) | C40 H79 N O10 | 779.57629 | 11.015 | 778.56903 | 2.056883031 | 0.000680729 | 1.079738101 | ↑ |
| Kinetin 9-riboside | C15 H17 N5 O5 | 347.12371 | 5.231 | 346.11664 | 0.393270508 | 0.000701893 | 1.228072162 | ↓ |
| 6-Phosphogluconic acid | C6 H13 O10 P | 276.02473 | 1.518 | 275.01746 | 0.423633815 | 0.000705915 | 1.142193 | ↓ |
| isonicotinaldehyde 4-(5-methyl-2,4-dinitrophenyl)hydrazone | C13 H11 N5 O4 | 301.08006 | 3.626 | 300.07278 | 0.252015572 | 0.000720306 | 1.177564589 | ↓ |
| L-beta-Imidazolelactic acid | C6 H8 N2 O3 | 156.05389 | 2.255 | 155.04662 | 0.353078123 | 0.000743778 | 1.17812482 | ↓ |
| Sodium Dehydrocholate | C24 H33 Na O5 | 424.22237 | 6.105 | 423.21481 | 0.494839714 | 0.000769293 | 1.321216742 | ↓ |
| Hydroquinone | C6 H6 O2 | 110.03705 | 5.471 | 109.02973 | 0.542920462 | 0.000830197 | 1.186289876 | ↓ |
| Salicylic acid | C7 H6 O3 | 138.03205 | 5.492 | 137.02472 | 0.365163261 | 0.000843653 | 1.11988989 | ↓ |
| 19(R)-hydroxy Prostaglandin A2 | C20 H30 O5 | 332.19911 | 6.694 | 331.19186 | 0.502631576 | 0.000871052 | 1.083409676 | ↓ |
| 2-Methoxyestradiol (2-MeOE2) | C19 H26 O3 | 302.18843 | 6.898 | 301.18097 | 0.508314987 | 0.000871713 | 1.189315961 | ↓ |
| 2-(benzoylamino)-4,5-dimethoxybenzoic acid | C16 H15 N O5 | 301.09529 | 5.718 | 300.08792 | 0.453727889 | 0.000880514 | 1.030989886 | ↓ |
| N-Acetylglucosamine 1-phosphate | C8 H16 N O9 P | 301.05635 | 1.648 | 300.04907 | 0.289239037 | 0.000888766 | 1.103757633 | ↓ |
| (±)11(12)-EET | C20 H32 O3 | 320.23531 | 8.41 | 319.22797 | 0.48474637 | 0.000892948 | 1.116386609 | ↓ |
| Adenylosuccinic acid | C14 H18 N5 O11 P | 463.07246 | 4.679 | 462.06519 | 0.170833114 | 0.000895375 | 1.286636772 | ↓ |
| Benzoic acid | C7 H6 O2 | 122.03705 | 5.63 | 121.02972 | 0.552899059 | 0.000901858 | 1.154216028 | ↓ |
| 4-Aminoindole | C8 H8 N2 | 132.06844 | 5.657 | 263.12961 | 0.644869463 | 0.000939996 | 1.241471566 | ↓ |
| SM (d14:1/20:0) | C39 H79 N2 O6 P | 748.57442 | 10.855 | 747.56714 | 2.010743612 | 0.000970618 | 1.061923417 | ↑ |
| Pyridoxal 5-phosphate monohydrate | C8 H12 N O7 P | 265.03544 | 2.341 | 264.02814 | 0.580200073 | 0.000984803 | 1.045252828 | ↓ |
| 1-Methyladenosine | C11 H15 N5 O4 | 281.11117 | 1.382 | 280.10391 | 0.565353888 | 0.000993722 | 1.144449207 | ↓ |
| N-Acetyl-DL-alanine | C5 H9 N O3 | 131.05851 | 1.607 | 130.05119 | 0.643879689 | 0.000994675 | 1.084253164 | ↓ |
| Propylparaben | C10 H12 O3 | 180.07903 | 6.217 | 179.07169 | 0.449631471 | 0.001011371 | 1.07083345 | ↓ |
| (±)7(8)-DiHDPA | C22 H34 O4 | 362.24606 | 8.338 | 361.23798 | 0.540109168 | 0.001028873 | 1.263668756 | ↓ |
| Thymopentin | C30 H49 N9 O9 | 679.36818 | 11.943 | 678.3609 | 1.989902741 | 0.001031505 | 1.026990039 | ↑ |
| Triacanthine | C10 H13 N5 | 203.11744 | 5.602 | 202.11015 | 0.616512561 | 0.001044544 | 1.15374472 | ↓ |
| Docosatrienoic Acid | C22 H38 O2 | 334.28749 | 11.055 | 333.28015 | 2.086749299 | 0.00110098 | 1.088323555 | ↑ |
| Lysopc 14:0 | C22 H46 N O7 P | 467.29983 | 5.669 | 466.29279 | 0.597961019 | 0.001134654 | 1.01440228 | ↓ |
| 3-(4-acetylanilino)-1-(4-fluorophenyl)prop-2-en-1-one | C17 H14 F N O2 | 283.0981 | 5.19 | 282.09082 | 0.222029664 | 0.001144693 | 1.223581504 | ↓ |
| Glycocholic acid | C26 H43 N O6 | 465.30886 | 6.812 | 464.30139 | 7.262277393 | 0.001158032 | 1.111907074 | ↑ |
| D-Glucuronic acid | C6 H10 O7 | 194.0418 | 6.066 | 387.07632 | 2.358258247 | 0.001193654 | 1.055044905 | ↑ |
| 4-Pyridoxic acid | C8 H9 N O4 | 183.0535 | 3.586 | 182.04616 | 0.583756499 | 0.001206143 | 1.104599311 | ↓ |
| LPS 18:1 | C24 H46 N O9 P | 523.29129 | 9.335 | 522.28406 | 0.51950474 | 0.001206892 | 1.002310109 | ↓ |
| FAHFA (20:3/22:5) | C42 H66 O4 | 634.49418 | 10.282 | 633.48627 | 3.464306983 | 0.001244846 | 1.156607685 | ↑ |
| [4-methyl-2-(3-pyridylimino)-1,3-thiazolan-4-yl]methanol | C10 H13 N3 O S | 294.04132 | 1.541 | 293.03409 | 0.268634648 | 0.001270027 | 1.071929359 | ↓ |
| Capric acid | C10 H20 O2 | 172.14685 | 7.476 | 171.13913 | 0.622985999 | 0.001289154 | 1.027511433 | ↓ |
| 6-Hydroxymelatonin | C13 H16 N2 O3 | 248.1167 | 5.885 | 247.10898 | 0.536422368 | 0.001309015 | 1.304468039 | ↓ |
| 4-(hydroxymethyl)benzoic acid | C8 H8 O3 | 152.04773 | 5.557 | 151.04044 | 0.574202247 | 0.001420691 | 1.181932336 | ↓ |
| 2-Arachidonyl Glycerol ether | C23 H40 O3 | 400.26904 | 5.483 | 399.26196 | 0.499144126 | 0.001446748 | 1.030794615 | ↓ |
| 3-methyl-4-[2-(2-methylphenyl)hydrazono]-4,5-dihydro-1H-pyrazol-5-one | C11 H12 N4 O | 170.0945 | 5.457 | 169.08733 | 0.148849913 | 0.001450951 | 1.044809386 | ↓ |
| α-Cyclodextrin | C36 H60 O30 | 972.31877 | 4.838 | 971.31189 | 0.53691636 | 0.001503873 | 1.06532678 | ↓ |
| Cer-BDS (d17:0/16:0) | C33 H67 N O4 | 587.51313 | 10.918 | 586.50592 | 1.76952099 | 0.001571705 | 1.156789324 | ↑ |
| 4-Hydroxybenzoic acid | C7 H6 O3 | 138.03204 | 6.013 | 137.02473 | 0.388692329 | 0.00158739 | 1.146643001 | ↓ |
| N-Acetyl-DL-glutamic acid | C7 H11 N O5 | 189.06406 | 3.956 | 188.05678 | 0.6565513 | 0.001661502 | 1.095831973 | ↓ |
| Adrenic acid | C22 H36 O2 | 332.27183 | 10.531 | 331.26459 | 6.654361465 | 0.00171295 | 1.289738014 | ↑ |
| N1-[3-(1H-imidazol-1-yl)propyl]-2-[(4-nitrobenzoyl)amino]benzamide | C20 H19 N5 O4 | 393.1461 | 5.871 | 392.13898 | 0.451132868 | 0.001869311 | 1.076290388 | ↓ |
| 2-(2-pyridyl)-2-{2-[4-(trifluoromethoxy)phenyl]hydrazono}acetonitrile | C14 H9 F3 N4 O | 306.07405 | 4.867 | 305.06677 | 4.072836909 | 0.002017123 | 1.125774748 | ↑ |
| Azelaic acid | C9 H16 O4 | 188.10523 | 5.851 | 187.0979 | 0.557343202 | 0.002117563 | 1.234986734 | ↓ |
| Bz-RS-ISer(3-Ph)-Ome | C17 H17 N O4 | 299.11609 | 5.591 | 298.10876 | 0.654722241 | 0.00225179 | 1.181819181 | ↓ |
| Propionyl-L-carnitine | C10 H19 N O4 | 217.13187 | 5.263 | 216.12444 | 0.49855729 | 0.002312377 | 1.23541388 | ↓ |
| D-myo-Inositol 1,4-bisphosphate | C6 H14 O12 P2 | 339.99648 | 1.564 | 338.98932 | 0.363182948 | 0.002396681 | 1.030768809 | ↓ |
| 3,8,9-trihydroxy-10-propyl-3,4,5,8,9,10-hexahydro-2H-oxecin-2-one | C12 H20 O5 | 244.1314 | 5.716 | 243.12416 | 0.537554028 | 0.002449541 | 1.113985903 | ↓ |
| 7-Ketolithocholic acid | C24 H38 O4 | 390.27705 | 7.119 | 389.26968 | 2.132251406 | 0.002463044 | 1.003075787 | ↑ |
| 6-(4-methoxyphenyl)pyrimidine-2,4-diamine | C11 H12 N4 O | 216.09995 | 5.649 | 215.09265 | 0.15228547 | 0.002558006 | 1.014813021 | ↓ |
| L-Threonic acid | C4 H8 O5 | 136.0375 | 1.389 | 135.03023 | 2.85207637 | 0.002680489 | 1.100608983 | ↑ |
| 3-(4-chloroanilino)-2-(isopropylsulfonyl)acrylonitrile | C12 H13 Cl N2 O2 S | 284.03592 | 5.459 | 283.0289 | 0.418964892 | 0.003440211 | 1.000437706 | ↓ |
| Octanedioic acid | C8 H14 O4 | 174.0895 | 2.301 | 173.08208 | 0.38173503 | 0.003469219 | 1.061706026 | ↓ |
| Leucine-enkephalin | C28 H37 N5 O7 | 555.27156 | 5.434 | 554.26428 | 0.56157038 | 0.003469873 | 1.018289062 | ↓ |
| Catechol | C6 H6 O2 | 110.03698 | 5.346 | 109.02967 | 0.483272088 | 0.00383384 | 1.270266332 | ↓ |
| β-Estradiol-17β-glucuronide | C24 H32 O8 | 448.21325 | 6.138 | 447.20605 | 0.573569532 | 0.003966516 | 1.027325613 | ↓ |
| Dehydrocholic acid | C24 H34 O5 | 402.24069 | 6.938 | 401.2334 | 2.364674371 | 0.004091424 | 1.084322923 | ↑ |
| N1-[4-(aminosulfonyl)phenyl]-2-[4-(tert-butyl)phenoxy]propanamide | C19 H24 N2 O4 S | 376.14817 | 1.46 | 375.14117 | 0.544477177 | 0.00413957 | 1.033843085 | ↓ |
| LPE 17:0 | C22 H46 N O7 P | 467.30178 | 9.591 | 466.29443 | 0.348399924 | 0.004354338 | 1.007624307 | ↓ |
| N1-(6-methyl-4-oxo-3,4-dihydroquinazolin-2-yl)-4-nitrobenzamide | C16 H12 N4 O4 | 324.08824 | 6.004 | 323.0809 | 0.454715739 | 0.004476433 | 1.003257395 | ↓ |
| 2-(Formylamino)Benzoic Acid | C8 H7 N O3 | 165.0431 | 5.111 | 164.0358 | 0.364340153 | 0.0047364 | 1.182375217 | ↓ |
| 11-deoxy Corticosterone | C21 H30 O3 | 376.22676 | 6.42 | 375.22 | 0.345950118 | 0.005190484 | 1.00821848 | ↓ |
| nor-6β-Oxycodol | C17 H21 N O4 | 303.1433 | 1.329 | 302.13593 | 2.295043283 | 0.005454065 | 1.117762777 | ↑ |
| Cholic acid | C24 H40 O5 | 408.28748 | 7.267 | 407.28009 | 1.582586639 | 0.005544928 | 1.121938135 | ↑ |
| Cannabigerolic acid | C22 H32 O4 | 157.1122 | 5.998 | 359.2226 | 1.882514724 | 0.005730077 | 1.154051644 | ↑ |
| 4-(acetylamino)phenyl 6-(trifluoromethyl)pyridine-2-carboxylate | C15 H11 F3 N2 O3 | 324.07486 | 5.592 | 323.06763 | 0.632865226 | 0.005956781 | 1.079590328 | ↓ |
| Alanyltyrosine | C12 H16 N2 O4 | 252.11067 | 3.813 | 251.10341 | 0.225003884 | 0.006123422 | 1.008080908 | ↓ |
| 7-Ketodeoxycholic acid | C24 H38 O5 | 406.27181 | 6.593 | 405.26431 | 1.597143821 | 0.006384093 | 1.010343712 | ↑ |
| Protoporphyrin IX | C34 H34 N4 O4 | 562.25867 | 9.955 | 561.25134 | 3.515537305 | 0.006991444 | 1.125923043 | ↑ |
| 5-Dehydroquinic acid | C7 H10 O6 | 190.04824 | 5.006 | 189.04085 | 0.510718101 | 0.007463018 | 1.065285582 | ↓ |
| 3,7-Dimethyluric acid | C7 H8 N4 O3 | 196.06001 | 4.722 | 195.05286 | 0.579099735 | 0.007749256 | 1.0398005 | ↓ |
| N-Acetylvaline | C7 H13 N O3 | 159.08999 | 5.014 | 158.08278 | 0.611676339 | 0.009747203 | 1.090112721 | ↓ |
| N-Acetyl-L-glutamate | C7 H11 N O5 | 189.06405 | 2.023 | 188.05688 | 0.634601847 | 0.011244863 | 1.129542253 | ↓ |
| 3-Hydroxyphenylalanine | C9 H11 N O3 | 181.07431 | 3.076 | 180.06703 | 1.758782078 | 0.0116368 | 1.036182718 | ↑ |
| 5-Hydroxymethyluracil | C5 H6 N2 O3 | 142.03811 | 1.482 | 187.03642 | 1.631934529 | 0.011765191 | 1.042325334 | ↑ |
| 1-(2,4-dihydroxyphenyl)-2-(3,5-dimethoxyphenyl)propan-1-one | C17 H18 O5 | 302.11703 | 5.655 | 301.10941 | 0.325346806 | 0.012673494 | 1.03463456 | ↓ |
| Oleoyl Ethanolamide | C20 H39 N O2 | 371.30375 | 10.192 | 370.29648 | 2.601622086 | 0.013386576 | 1.012696697 | ↑ |
| 3-oxoindane-1-carboxylic acid | C10 H8 O3 | 176.04784 | 5.323 | 175.04059 | 0.200308251 | 0.013431173 | 1.275784447 | ↓ |
| Galacturonic acid | C6 H10 O7 | 194.04297 | 1.38 | 193.03569 | 0.601642144 | 0.016070691 | 1.178771469 | ↓ |
| 11(Z),14(Z)-Eicosadienoic Acid | C20 H36 O2 | 308.27178 | 10.773 | 307.26456 | 3.451919137 | 0.016641518 | 1.007234665 | ↑ |
| Quinolinic acid | C7 H5 N O4 | 167.02226 | 4.062 | 166.01498 | 0.521292348 | 0.017588939 | 1.16480316 | ↓ |
| methyl 2-cyano-2-[2-nitro-4-(trifluoromethyl)phenyl]acetate | C11 H7 F3 N2 O4 | 288.04175 | 5.197 | 287.03442 | 3.454756347 | 0.021669256 | 1.146761598 | ↑ |
| cis-4-Hydroxy-D-proline | C5 H9 N O3 | 131.05852 | 1.331 | 130.05122 | 1.581850687 | 0.023312168 | 1.164965222 | ↑ |
| MGMG (18:2) | C27 H48 O9 | 516.33029 | 8.987 | 515.32391 | 0.17362436 | 0.026739817 | 1.018293069 | ↓ |
| 4,6-dimethyl-2-(methylamino)-5-nitronicotinonitrile | C9 H10 N4 O2 | 206.0793 | 5.431 | 205.07196 | 35.00768248 | 0.027162376 | 1.489872509 | ↑ |
| Prostaglandin A1 ethyl ester | C22 H36 O4 | 346.25291 | 8.615 | 345.24564 | 1.739346916 | 0.034949987 | 1.533223329 | ↑ |
| trans-2-Butene-1,4-dicarboxylic Acid | C6 H8 O4 | 144.04223 | 4.855 | 145.04953 | 0.541431091 | 1.33E-12 | 2.255908822 | ↓ |
| Valylproline | C10 H18 N2 O3 | 214.13168 | 4.854 | 215.1389 | 0.229741137 | 3.22E-12 | 2.201497437 | ↓ |
| Uracil | C4 H4 N2 O2 | 112.02728 | 1.531 | 113.03457 | 0.304793639 | 1.73E-11 | 2.021690408 | ↓ |
| 17alpha-Ethinyl estradiol | C20 H24 O2 | 296.17756 | 8.422 | 297.18466 | 60.40451292 | 3.75E-11 | 2.213818432 | ↑ |
| Terephthalic Acid | C8 H6 O4 | 166.02661 | 1.395 | 167.03358 | 0.252763368 | 5.18E-11 | 2.005430275 | ↓ |
| Hesperetin | C16 H14 O6 | 302.07869 | 6.141 | 303.08603 | 7.636248026 | 4.50E-10 | 1.984468221 | ↑ |
| Diosmetin | C16 H12 O6 | 300.06499 | 6.092 | 301.07227 | 5.599400717 | 9.63E-10 | 1.887119199 | ↑ |
| ACar 20:6 | C27 H42 N O4 | 443.30306 | 6.152 | 444.31018 | 7.769159235 | 1.26E-09 | 1.966562655 | ↑ |
| DGMG (18:2) | C33 H58 O14 | 678.38193 | 4.815 | 340.19824 | 0.340730957 | 1.38E-09 | 1.932614819 | ↓ |
| Isobutyl benzoate | C11 H14 O2 | 178.09929 | 8.456 | 179.10672 | 12.16716966 | 2.54E-09 | 2.006465517 | ↑ |
| 3,4-Dimethylbenzoic acid | C9 H10 O2 | 150.068 | 8.562 | 151.07521 | 10.09672691 | 3.68E-09 | 2.078262236 | ↑ |
| 3-Acetyl-2,5-dimethylfuran | C8 H10 O2 | 138.0678 | 6.413 | 121.06451 | 0.541977102 | 3.82E-09 | 1.734034128 | ↓ |
| N8-Acetylspermidine | C9 H21 N3 O | 187.1685 | 1.312 | 188.17569 | 0.260108701 | 5.04E-09 | 1.832365091 | ↓ |
| L-Alanyl-L-proline | C8 H14 N2 O3 | 186.10037 | 1.963 | 187.10754 | 0.290955893 | 5.21E-09 | 1.813735457 | ↓ |
| 5α-Dihydrotestosterone | C19 H30 O2 | 290.22427 | 8.062 | 291.23196 | 0.422793231 | 1.07E-08 | 1.835949214 | ↓ |
| D-Carnitine | C7 H15 N O3 | 161.10505 | 6.546 | 162.11205 | 4.945686828 | 1.19E-08 | 1.859148587 | ↑ |
| 2-Arachidonoyl glycerol | C23 H38 O4 | 378.27541 | 7.652 | 379.28268 | 0.191322833 | 1.24E-08 | 1.909672987 | ↓ |
| Apigenin | C15 H10 O5 | 270.05415 | 6.093 | 271.06143 | 10.73629755 | 1.77E-08 | 1.736751477 | ↑ |
| Leucylproline | C11 H20 N2 O3 | 211.12087 | 5.152 | 212.12804 | 0.350651604 | 2.82E-08 | 1.759397582 | ↓ |
| D-Glucosamine 6-phosphate | C6 H14 N O8 P | 259.04579 | 1.386 | 260.05283 | 0.356971271 | 3.55E-08 | 1.811807875 | ↓ |
| Coumestrol | C15 H8 O5 | 268.03687 | 6.148 | 269.04361 | 5.272165926 | 3.65E-08 | 1.694754895 | ↑ |
| Purpurin | C14 H8 O5 | 256.03417 | 6.136 | 257.04144 | 8.569944113 | 3.77E-08 | 1.938476176 | ↑ |
| 2,6-Di-tert-butyl-1,4-benzoquinone | C14 H20 O2 | 220.14769 | 6.182 | 221.15497 | 4.168726941 | 4.37E-08 | 1.779585168 | ↑ |
| Citrinin | C13 H14 O5 | 272.06821 | 6.099 | 273.07568 | 5.596157057 | 4.41E-08 | 1.64756789 | ↑ |
| dAMP | C10 H14 N5 O6 P | 331.06859 | 6.168 | 332.07587 | 5.87710326 | 5.24E-08 | 1.905156295 | ↑ |
| (-)-Caryophyllene oxide | C15 H24 O | 220.18265 | 8.185 | 221.18965 | 0.273158666 | 5.36E-08 | 1.653054287 | ↓ |
| trans-4-Phenyl-4-piperidinocyclohexanol | C17 H25 N O | 259.18954 | 4.862 | 260.19669 | 0.397381869 | 5.84E-08 | 1.700483396 | ↓ |
| ACar 22:3 | C29 H52 N O4 | 477.38024 | 6.173 | 478.38751 | 6.340458577 | 6.39E-08 | 1.896206385 | ↑ |
| L-Alanyl-L-Lysine | C9 H19 N3 O3 | 217.14268 | 1.426 | 218.15018 | 0.447285441 | 6.67E-08 | 1.674342709 | ↓ |
| Methioninesulfoxide | C5 H11 N O3 S | 165.04266 | 1.451 | 166.04976 | 0.505646056 | 1.00E-07 | 1.550512128 | ↓ |
| Biochanin A | C16 H12 O5 | 284.06811 | 6.17 | 285.07553 | 3.799872287 | 1.42E-07 | 1.698168181 | ↑ |
| 3-Indoleacrylic acid | C11 H9 N O2 | 187.06319 | 4.813 | 188.07034 | 0.552152671 | 1.75E-07 | 1.734605192 | ↓ |
| Norbuprenorphine | C25 H35 N O4 | 413.26189 | 6.886 | 414.26938 | 0.252937776 | 1.77E-07 | 1.659710559 | ↓ |
| Narasin | C43 H72 O11 | 781.5311 | 6.107 | 782.53821 | 7.567372922 | 1.90E-07 | 1.812879557 | ↑ |
| Sulfamethazine | C12 H14 N4 O2 S | 278.08147 | 6.227 | 279.08875 | 3.101892453 | 1.99E-07 | 1.753548538 | ↑ |
| alpha-Farnesene | C15 H24 | 204.18781 | 6.92 | 205.1951 | 0.333341144 | 2.16E-07 | 1.643352877 | ↓ |
| 11(Z),14(Z),17(Z)-Eicosatrienoic acid | C20 H34 O2 | 306.25583 | 6.886 | 307.26303 | 0.333247902 | 2.50E-07 | 1.609028033 | ↓ |
| 1-Methylxanthine | C6 H6 N4 O2 | 166.04914 | 5.136 | 167.05644 | 0.15273074 | 2.77E-07 | 1.854587101 | ↓ |
| Progesterone | C21 H30 O2 | 314.22424 | 7.198 | 315.23175 | 0.296916497 | 2.95E-07 | 1.595171998 | ↓ |
| ACar 11:0 | C18 H36 N O4 | 329.25643 | 6.083 | 330.26379 | 7.618222992 | 2.99E-07 | 1.63526881 | ↑ |
| Nicotinamide N-oxide | C6 H6 N2 O2 | 138.04284 | 1.961 | 139.05005 | 0.469494849 | 3.06E-07 | 1.676850975 | ↓ |
| 3-Hydroxylidocaine | C14 H22 N2 O2 | 125.08397 | 5.13 | 126.09141 | 0.400549954 | 3.47E-07 | 1.728209238 | ↓ |
| Withanolide A | C28 H38 O6 | 470.26541 | 6.925 | 471.27292 | 0.411753768 | 4.02E-07 | 1.676355987 | ↓ |
| L-arginine | C6 H14 N4 O2 | 174.11198 | 4.846 | 175.11923 | 0.505599362 | 4.89E-07 | 1.477577566 | ↓ |
| 2-Hydroxy-6-Aminopurine | C5 H5 N5 O | 151.0494 | 1.445 | 152.0565 | 0.373322762 | 5.04E-07 | 1.408502253 | ↓ |
| α-Aspartylphenylalanine | C13 H16 N2 O5 | 280.10581 | 4.826 | 281.11282 | 0.338953647 | 5.81E-07 | 1.639079057 | ↓ |
| Acetophenone | C8 H8 O | 120.05756 | 8.045 | 103.05432 | 0.485795798 | 6.29E-07 | 1.648682846 | ↓ |
| Gly-Ile | C8 H16 N2 O3 | 188.11602 | 5.043 | 189.12299 | 0.389338657 | 6.31E-07 | 1.606462692 | ↓ |
| Thymine | C5 H6 N2 O2 | 126.0429 | 3.159 | 127.05018 | 0.27567405 | 6.57E-07 | 1.811611351 | ↓ |
| ACar 14:3 | C21 H36 N O4 | 365.25638 | 6.247 | 366.26376 | 5.593450435 | 6.95E-07 | 1.592723502 | ↑ |
| Milbemycin A4 oxime | C32 H45 N O7 | 537.31267 | 10.464 | 538.31995 | 3.649635698 | 7.97E-07 | 1.717781429 | ↑ |
| Glycyl-L-leucine | C8 H16 N2 O3 | 188.11604 | 3.974 | 189.12325 | 0.268983653 | 8.71E-07 | 1.59044659 | ↓ |
| Thymol | C10 H14 O | 150.10425 | 8.168 | 151.11183 | 0.335181263 | 8.78E-07 | 1.525642576 | ↓ |
| PC (6:0/7:0) | C21 H42 N O8 P | 467.27024 | 8.512 | 468.27841 | 5.444199074 | 1.10E-06 | 1.702151559 | ↑ |
| PB-22 N-(4-Hydroxypentyl)-3-carboxyindole metabolite | C14 H17 N O3 | 247.12476 | 2.565 | 248.13203 | 0.415401105 | 1.13E-06 | 1.609907523 | ↓ |
| Glu-Thr | C9 H16 N2 O6 | 248.10065 | 1.427 | 249.10747 | 0.529722341 | 1.19E-06 | 1.554405985 | ↓ |
| Pyridoxamine | C8 H12 N2 O2 | 168.09004 | 1.336 | 169.09746 | 0.381561874 | 1.30E-06 | 1.612284668 | ↓ |
| (1R,2R)-trans-N-Boc-1,2-cyclohexanediamine | C11 H22 N2 O2 | 214.16803 | 4.756 | 215.17529 | 160.5576274 | 1.33E-06 | 1.758634393 | ↑ |
| DL-Citrulline | C6 H13 N3 O3 | 175.09577 | 5.16 | 176.1031 | 0.535533899 | 1.63E-06 | 1.576299227 | ↓ |
| Isotretinoin | C20 H28 O2 | 300.20847 | 8.03 | 301.21512 | 0.426844964 | 1.71E-06 | 1.641513203 | ↓ |
| Histamine | C5 H9 N3 | 111.07967 | 1.243 | 112.08678 | 0.142573571 | 1.99E-06 | 1.601730376 | ↓ |
| tert-Butyl N-[1-(aminocarbonyl)-3-methylbutyl]carbamate | C11 H22 N2 O3 | 230.16293 | 5.091 | 231.17026 | 0.35966419 | 2.09E-06 | 1.557859396 | ↓ |
| Magnolol | C18 H18 O2 | 266.12602 | 6.116 | 267.13324 | 5.309669566 | 2.28E-06 | 1.604647633 | ↑ |
| 4',7-Dihydroxyflavanone | C15 H12 O4 | 239.04662 | 6.077 | 240.05437 | 3.638256739 | 2.42E-06 | 1.499451392 | ↑ |
| Biliverdin | C33 H34 N4 O6 | 582.24714 | 6.207 | 583.25488 | 3.528112164 | 2.47E-06 | 1.584267989 | ↑ |
| 9-Aminoacridine | C13 H10 N2 | 194.08432 | 6.231 | 195.0916 | 6.879440608 | 2.85E-06 | 1.669465294 | ↑ |
| PC (14:0e/2:0) | C24 H50 N O7 P | 495.32906 | 6.158 | 496.3367 | 4.949723294 | 2.91E-06 | 1.590580914 | ↑ |
| L-Thyroxine | C15 H11 I4 N O4 | 776.68651 | 6.207 | 777.69379 | 5.016494456 | 3.09E-06 | 1.636473205 | ↑ |
| Glycylproline | C7 H12 N2 O3 | 172.08478 | 1.448 | 173.09221 | 0.362150556 | 3.39E-06 | 1.48533466 | ↓ |
| Methionine sulfoxide | C5 H11 N O3 S | 165.04618 | 1.874 | 166.05345 | 0.543918843 | 4.50E-06 | 1.519926916 | ↓ |
| Coenzyme Q2 | C19 H26 O4 | 318.18305 | 7.61 | 319.19034 | 0.5783324 | 5.31E-06 | 1.471475998 | ↓ |
| 5'-Adenylic acid | C10 H14 N5 O7 P | 347.06291 | 4.811 | 348.07019 | 0.433081518 | 5.92E-06 | 1.641507174 | ↓ |
| Trigonelline | C7 H7 N O2 | 137.04771 | 2.636 | 138.05502 | 0.439792122 | 5.92E-06 | 1.600180652 | ↓ |
| 4-Hydroxymandelonitrile | C8 H7 N O2 | 149.0477 | 5.048 | 150.05495 | 0.395579665 | 6.78E-06 | 1.549851707 | ↓ |
| Pregnenolone | C21 H32 O2 | 316.23991 | 7.669 | 317.24707 | 0.383449962 | 7.21E-06 | 1.42914993 | ↓ |
| δ-Valerolactam | C5 H9 N O | 117.07854 | 8.377 | 118.08569 | 2.231886537 | 7.71E-06 | 1.690091731 | ↑ |
| (+)-Aphidicolin | C20 H34 O4 | 360.22955 | 8.078 | 361.23697 | 0.516356664 | 8.29E-06 | 1.486289257 | ↓ |
| cis-Resveratrol | C14 H12 O3 | 228.0785 | 6.247 | 229.08568 | 2.176828379 | 8.48E-06 | 1.509242157 | ↑ |
| Ala-Gln | C8 H15 N3 O4 | 217.10623 | 1.399 | 218.11324 | 0.443387873 | 9.22E-06 | 1.613090787 | ↓ |
| D-(+)-Glucose | C6 H12 O6 | 197.08988 | 1.358 | 198.09694 | 0.536133528 | 9.78E-06 | 1.491313263 | ↓ |
| 6??-Hydroxytestosterone | C19 H28 O3 | 304.20343 | 7.667 | 305.21033 | 0.486378633 | 1.01E-05 | 1.472559076 | ↓ |
| Eicosapentaenoic acid | C20 H30 O2 | 302.22428 | 7.287 | 303.23166 | 0.182440581 | 1.02E-05 | 1.355685345 | ↓ |
| Obacunoic acid | C26 H32 O8 | 472.20934 | 6.222 | 473.2171 | 4.005679927 | 1.04E-05 | 1.839922007 | ↑ |
| 3-Methoxy prostaglandin F1α | C21 H38 O6 | 368.25734 | 7.617 | 369.26514 | 0.400980083 | 1.10E-05 | 1.557873631 | ↓ |
| N-Methylphenylalanine | C10 H13 N O2 | 179.09441 | 4.998 | 180.10175 | 0.282711638 | 1.17E-05 | 1.478762993 | ↓ |
| Thr-Leu | C10 H20 N2 O4 | 232.14219 | 5.106 | 233.1494 | 0.418518228 | 1.17E-05 | 1.41573602 | ↓ |
| 5,6-Dihydrouracil | C4 H6 N2 O2 | 114.0429 | 1.751 | 115.05016 | 0.494520561 | 1.28E-05 | 1.386243011 | ↓ |
| 10-Undecenoic acid | C11 H20 O2 | 184.147 | 7.36 | 391.28323 | 0.228854987 | 1.38E-05 | 1.449539117 | ↓ |
| 4-Hydroxypropranolol | C16 H21 N O3 | 275.14788 | 4.899 | 276.15494 | 0.587108749 | 1.48E-05 | 1.35773993 | ↓ |
| Coenzyme Q1 | C14 H18 O4 | 250.12011 | 6.112 | 251.12766 | 2.319029582 | 1.60E-05 | 1.424704395 | ↑ |
| ACar 16:3 | C23 H40 N O4 | 393.28774 | 6.513 | 394.29529 | 19.1482596 | 1.64E-05 | 1.387270095 | ↑ |
| Myristicin | C11 H12 O3 | 192.08118 | 6.216 | 193.08846 | 1.812429621 | 1.73E-05 | 1.526218863 | ↑ |
| Dl-Lanthionine | C6 H12 N2 O4 S | 208.05121 | 5.075 | 209.05849 | 0.553572983 | 1.93E-05 | 1.426193891 | ↓ |
| D-Phenylalanine | C9 H11 N O2 | 165.07902 | 1.453 | 166.08626 | 0.553094443 | 2.01E-05 | 1.480498378 | ↓ |
| Ala-Ile | C9 H18 N2 O3 | 202.13174 | 5.096 | 203.13898 | 0.329832935 | 2.10E-05 | 1.423261091 | ↓ |
| Anthranilic acid | C7 H7 N O2 | 137.04768 | 4.939 | 138.05515 | 0.528403878 | 2.17E-05 | 1.361012795 | ↓ |
| Riboflavin-5-phosphate | C17 H21 N4 O9 P | 456.10314 | 5.428 | 457.11041 | 0.385253107 | 2.32E-05 | 1.42546745 | ↓ |
| 7Z, 10Z, 13Z, 16Z, 19Z-docosapentaenoic acid | C22 H34 O2 | 330.25641 | 8.107 | 331.26398 | 0.56715208 | 2.47E-05 | 1.52666919 | ↓ |
| DL-3-Aminoisobutyric acid | C4 H9 N O2 | 103.06339 | 1.777 | 104.07075 | 0.341864568 | 2.61E-05 | 1.405884471 | ↓ |
| Urocanic acid | C6 H6 N2 O2 | 155.06951 | 1.446 | 156.07675 | 0.325299348 | 2.62E-05 | 1.406794271 | ↓ |
| (9cis)-Retinal | C20 H28 O | 284.2137 | 6.094 | 285.22134 | 3.26229557 | 2.75E-05 | 1.424418039 | ↑ |
| N1-Acetylspermine | C12 H28 N4 O | 122.11321 | 1.291 | 123.12048 | 0.426281004 | 2.77E-05 | 1.291038852 | ↓ |
| 5-Hydroxyindole-3-acetic acid | C10 H9 N O3 | 191.05797 | 5.182 | 192.06514 | 0.464689884 | 2.90E-05 | 1.402003212 | ↓ |
| Lysopg 18:1 | C24 H47 O9 P | 510.29783 | 8.009 | 511.30527 | 0.596745457 | 3.12E-05 | 1.305259812 | ↓ |
| 4-Methoxycinnamaldehyde | C10 H10 O2 | 162.06797 | 6.745 | 163.07509 | 0.465153231 | 3.12E-05 | 1.3304547 | ↓ |
| L-Dopa | C9 H11 N O4 | 197.06871 | 1.444 | 198.07603 | 0.521660053 | 3.22E-05 | 1.375727704 | ↓ |
| Fludrocortisone acetate | C23 H31 F O6 | 422.2071 | 6.166 | 423.2149 | 4.682185185 | 3.25E-05 | 1.467656119 | ↑ |
| Taurodeoxycholic acid sodium salt | C26 H44 N Na O6 S | 521.27884 | 8.058 | 522.28644 | 0.499604026 | 3.35E-05 | 1.390519064 | ↓ |
| Epinephrine | C9 H13 N O3 | 183.08941 | 5.091 | 184.0963 | 0.621218011 | 3.48E-05 | 1.327334762 | ↓ |
| D-3-Phenyllactic acid | C9 H10 O3 | 166.06324 | 1.475 | 167.07071 | 0.54799197 | 3.77E-05 | 1.392600777 | ↓ |
| Nandrolone | C18 H26 O2 | 274.19298 | 8.042 | 275.20071 | 0.517525511 | 3.81E-05 | 1.433291705 | ↓ |
| Safrole | C10 H10 O2 | 162.0679 | 8.023 | 163.07501 | 0.613184635 | 3.95E-05 | 1.404122962 | ↓ |
| Licochalcone A | C21 H22 O4 | 338.15151 | 6.815 | 339.15848 | 12.46999238 | 4.45E-05 | 1.650231687 | ↑ |
| Val-Ser | C8 H16 N2 O4 | 204.111 | 1.436 | 205.118 | 0.579310928 | 4.54E-05 | 1.285938845 | ↓ |
| 8-Aminooctanoic acid | C8 H17 N O2 | 159.12632 | 1.261 | 160.13361 | 0.430370574 | 4.78E-05 | 1.27086039 | ↓ |
| Vitamin A | C20 H30 O | 286.22926 | 7.251 | 287.23639 | 0.561151214 | 4.82E-05 | 1.424228558 | ↓ |
| Benzyl cinnamate | C16 H14 O2 | 238.09511 | 3.657 | 239.10239 | 0.575614099 | 4.83E-05 | 1.391150879 | ↓ |
| 5-fluoro AB-PINACA N-(4-hydroxypentyl) metabolite | C18 H25 F N4 O3 | 386.17262 | 7.096 | 387.1799 | 2.844045202 | 4.85E-05 | 1.505714146 | ↑ |
| 3-Hydroxyproline | C5 H9 N O3 | 131.05823 | 5.069 | 132.06555 | 0.447182054 | 4.95E-05 | 1.236524065 | ↓ |
| 1-Oleoyl-Sn-Glycero-3-Phosphocholine | C26 H52 N O7 P | 521.35045 | 8.147 | 522.35699 | 0.36673521 | 5.10E-05 | 1.325275791 | ↓ |
| Methyltestosterone | C20 H30 O2 | 302.22396 | 6.092 | 303.23123 | 1.704309505 | 5.36E-05 | 1.323793382 | ↑ |
| N epsilon,N epsilon,N epsilon-trimethyllysine | C9 H20 N2 O2 | 188.15251 | 3.536 | 189.15979 | 0.06133304 | 6.05E-05 | 1.44251493 | ↓ |
| 18-β-Glycyrrhetinic acid | C30 H46 O4 | 470.33919 | 8.485 | 471.34634 | 112.9406789 | 6.18E-05 | 1.673569144 | ↑ |
| 2-Phenylglycine | C8 H9 N O2 | 151.06315 | 4.955 | 152.07037 | 0.364846068 | 6.94E-05 | 1.22334548 | ↓ |
| Carbendazim | C9 H9 N3 O2 | 191.06943 | 5.216 | 192.07672 | 0.26732155 | 6.97E-05 | 1.260493058 | ↓ |
| β-Estradiol | C18 H24 O2 | 136.08874 | 7.144 | 137.09601 | 0.582954063 | 7.37E-05 | 1.437023842 | ↓ |
| Cytidine | C9 H13 N3 O5 | 243.08561 | 1.442 | 244.09271 | 0.543977064 | 8.28E-05 | 1.31783375 | ↓ |
| Undecanedioic acid | C11 H20 O4 | 216.1361 | 5.497 | 217.14325 | 0.59620343 | 8.80E-05 | 1.317777373 | ↓ |
| Artemisinin | C15 H22 O5 | 130.08206 | 6.187 | 131.0896 | 2.341541833 | 9.73E-05 | 1.292285946 | ↑ |
| trans-Anethole | C10 H12 O | 148.0888 | 8.204 | 149.09598 | 0.200303026 | 9.97E-05 | 1.298760605 | ↓ |
| Neosaxitoxin | C10 H17 N7 O5 | 297.1212 | 5.083 | 298.12872 | 0.575756868 | 0.000104521 | 1.326681417 | ↓ |
| 1-Aminocyclohexanecarboxylic acid | C7 H13 N O2 | 143.09472 | 2.655 | 144.10205 | 0.219163715 | 0.000110605 | 1.357643118 | ↓ |
| ACar 12:0 | C19 H38 N O4 | 343.27182 | 6.353 | 344.27939 | 7.447627136 | 0.000113594 | 1.355205179 | ↑ |
| Limonin | C26 H30 O8 | 452.18158 | 7.024 | 453.18985 | 19.63992744 | 0.000113842 | 1.417247408 | ↑ |
| ACar 4:0 | C11 H22 N O4 | 231.14692 | 4.986 | 232.15436 | 9.194903798 | 0.000113973 | 1.285186586 | ↑ |
| Ecgonine methyl ester | C10 H17 N O3 | 199.12081 | 5.013 | 200.12778 | 0.364702188 | 0.000114859 | 1.315666008 | ↓ |
| S-Methyl-L-cysteine | C4 H9 N O2 S | 135.0354 | 4.825 | 136.04269 | 0.557409073 | 0.000121776 | 1.28766078 | ↓ |
| Prostaglandin B2 | C20 H30 O4 | 334.21385 | 6.115 | 335.22153 | 2.036128843 | 0.000127059 | 1.246861131 | ↑ |
| 5-Hydroxymethyl-2-furancarboxylic acid | C6 H6 O4 | 142.02629 | 6.132 | 143.03352 | 2.601968066 | 0.000127333 | 1.33170426 | ↑ |
| N-Acetyl-L-methionine | C7 H13 N O3 S | 191.06124 | 5.241 | 192.06851 | 0.549865118 | 0.000127337 | 1.215802635 | ↓ |
| Folinic acid | C20 H23 N7 O7 | 473.16573 | 5.035 | 474.17252 | 10.65102743 | 0.000132799 | 1.325671634 | ↑ |
| 2'-Deoxyuridine | C9 H12 N2 O5 | 228.07438 | 3.024 | 229.08186 | 0.410142768 | 0.000133997 | 1.364495775 | ↓ |
| 4-Phenyl-3-buten-2-one | C10 H10 O | 146.073 | 6.462 | 147.07999 | 0.30428489 | 0.00014144 | 1.150298133 | ↓ |
| ACar 15:1 | C22 H42 N O4 | 383.30344 | 6.702 | 384.31104 | 4.650389649 | 0.000142926 | 1.309392895 | ↑ |
| U-44069 | C21 H34 O4 | 332.23471 | 8.156 | 333.24249 | 0.518014307 | 0.000149121 | 1.115328117 | ↓ |
| ACar 20:3 | C27 H48 N O4 | 449.34975 | 7.124 | 450.35672 | 3.971395827 | 0.000160156 | 1.264797742 | ↑ |
| N2-Acetyl- L-lysine | C8 H16 N2 O3 | 188.11605 | 1.445 | 189.12338 | 0.576716783 | 0.000184969 | 1.33273618 | ↓ |
| L-(+)-Citrulline | C6 H13 N3 O3 | 180.05091 | 1.349 | 181.05809 | 0.524932122 | 0.000187333 | 1.280631073 | ↓ |
| (+/-)-Equol | C15 H14 O3 | 242.09413 | 6.095 | 243.10165 | 3.805546819 | 0.000191196 | 1.270689034 | ↑ |
| 5-Hydroxyindole | C8 H7 N O | 133.0527 | 5.014 | 134.06024 | 0.450826886 | 0.00020812 | 1.321005303 | ↓ |
| Estriol | C18 H24 O3 | 288.17203 | 6.569 | 289.1796 | 3.128275805 | 0.000221547 | 1.22915112 | ↑ |
| DL-α-Aminocaprylic acid | C8 H17 N O2 | 159.12594 | 4.002 | 160.13335 | 0.174449402 | 0.000246145 | 1.392048129 | ↓ |
| Ascorbyl palmitate | C22 H38 O7 | 431.28791 | 5.485 | 432.29538 | 5.812516101 | 0.000265744 | 1.380558561 | ↑ |
| Diisobutylphthalate | C16 H22 O4 | 278.14995 | 6.721 | 279.15723 | 0.395501964 | 0.000307731 | 1.226284265 | ↓ |
| Loxoprofen | C15 H18 O3 | 246.12131 | 5.071 | 247.12837 | 0.595225008 | 0.000308375 | 1.082872128 | ↓ |
| Ginsenoside Rg3 | C42 H72 O13 | 766.48534 | 7.09 | 767.49152 | 2.528105207 | 0.000323715 | 1.227110002 | ↑ |
| D-Ala-D-Ala | C6 H12 N2 O3 | 160.08465 | 1.46 | 183.07387 | 0.482220025 | 0.000338757 | 1.274670828 | ↓ |
| Histidine | C6 H9 N3 O2 | 155.07299 | 4.859 | 156.08022 | 0.554849366 | 0.00034565 | 1.245863959 | ↓ |
| L-(-)-Methionine | C5 H11 N O2 S | 149.05107 | 1.931 | 150.05832 | 0.558274944 | 0.000357575 | 1.140928246 | ↓ |
| (+/-)12(13)-DiHOME | C18 H34 O4 | 296.23483 | 6.521 | 297.24197 | 0.213073717 | 0.000462799 | 1.253964199 | ↓ |
| Nicotinic acid mononucleotide | C11 H14 N O9 P | 335.0406 | 1.459 | 336.04742 | 0.232281221 | 0.000474502 | 1.084239441 | ↓ |
| 4-Ethoxybenzaldehyde | C9 H10 O2 | 150.06896 | 6.174 | 151.07623 | 1.7284033 | 0.000479044 | 1.157552165 | ↑ |
| Guanine | C5 H5 N5 O | 151.04945 | 3.438 | 152.05682 | 0.469520824 | 0.000520611 | 1.248791118 | ↓ |
| Cadaverine | C5 H14 N2 | 102.11574 | 1.215 | 103.12301 | 0.35735919 | 0.000626014 | 1.372947714 | ↓ |
| 3-Methylhistamine | C6 H11 N3 | 125.09539 | 1.282 | 126.10268 | 0.273937072 | 0.000628112 | 1.198907532 | ↓ |
| 4-Guanidinobutanoic acid | C5 H11 N3 O2 | 145.08523 | 5.271 | 146.09254 | 0.502327346 | 0.000700592 | 1.104100288 | ↓ |
| 2'-Deoxycytidine | C9 H13 N3 O4 | 227.0905 | 1.442 | 228.09752 | 0.599340719 | 0.000711404 | 1.143786828 | ↓ |
| Pyrrole-2-carboxylic acid | C5 H5 N O2 | 111.03209 | 1.374 | 129.06596 | 13.74246177 | 0.00077947 | 1.217010295 | ↑ |
| Cortisol | C21 H30 O5 | 362.21104 | 6.449 | 363.21808 | 0.517874896 | 0.000797402 | 1.106442858 | ↓ |
| cAMP | C10 H12 N5 O6 P | 329.05328 | 6.884 | 330.06064 | 0.352628012 | 0.000813208 | 1.191385527 | ↓ |
| Quinine | C20 H24 N2 O2 | 324.17763 | 6.212 | 325.18491 | 1.762069714 | 0.000861352 | 1.089162506 | ↑ |
| L-2,4-Diaminobutyric acid | C4 H10 N2 O2 | 118.07618 | 1.934 | 119.08349 | 0.509819925 | 0.000870493 | 1.064936272 | ↓ |
| 3-Ureidopropionic acid | C4 H8 N2 O3 | 132.0535 | 1.742 | 115.05014 | 0.641521398 | 0.000879418 | 1.07654209 | ↓ |
| Threitol | C4 H10 O4 | 122.04794 | 1.426 | 123.0552 | 2.251926342 | 0.000911144 | 1.264956134 | ↑ |
| 3-Succinoylpyridine | C9 H9 N O3 | 179.05845 | 4.892 | 180.06578 | 0.538698926 | 0.000924471 | 1.069456708 | ↓ |
| 2'-Deoxyadenosine-5'-monophosphate | C10 H14 N5 O6 P | 331.06761 | 1.897 | 332.07489 | 0.190640955 | 0.000960516 | 1.1570541 | ↓ |
| 6-Methylnicotinamide | C7 H8 N2 O | 136.06353 | 1.443 | 137.07066 | 0.174040272 | 0.001034267 | 1.040474246 | ↓ |
| Benzamidine Hydrochloride Hydrate | C7 H11 Cl N2 O | 174.05557 | 5.073 | 175.06284 | 0.653259867 | 0.001043559 | 1.184867574 | ↓ |
| 5-trans prostaglandin F2β | C20 H34 O5 | 376.22428 | 6.539 | 377.23117 | 0.600979829 | 0.001059974 | 1.149441227 | ↓ |
| ACar 16:4 | C23 H38 N O4 | 369.28983 | 6.48 | 392.27905 | 3.713122061 | 0.001086284 | 1.246624673 | ↑ |
| 3',4'-Dihydroxyphenylacetone | C9 H10 O3 | 166.0627 | 6.199 | 167.06998 | 2.540530567 | 0.001146497 | 1.213588098 | ↑ |
| Pipecolic acid | C6 H11 N O2 | 129.07901 | 1.464 | 130.08623 | 0.538293061 | 0.00122611 | 1.184593875 | ↓ |
| ACar 15:0 | C22 H44 N O4 | 385.31932 | 6.755 | 386.32678 | 4.331267554 | 0.001246598 | 1.11576715 | ↑ |
| Ala-Val | C8 H16 N2 O3 | 188.11595 | 2.347 | 189.12323 | 0.572517463 | 0.00126003 | 1.144228264 | ↓ |
| 6β-Hydrocodol N-oxide | C18 H23 N O4 | 317.16579 | 6.521 | 318.17343 | 4.185692697 | 0.001262301 | 1.12060796 | ↑ |
| Piperine | C17 H19 N O3 | 285.13611 | 6.643 | 286.14334 | 3.534625299 | 0.001450517 | 1.430100992 | ↑ |
| Norfloxacin | C16 H18 F N3 O3 | 319.13776 | 1.402 | 320.14508 | 0.521594975 | 0.00151647 | 1.081403179 | ↓ |
| Lysopa 16:0 | C19 H39 O7 P | 410.24258 | 6.969 | 411.24954 | 0.608920808 | 0.001739683 | 1.155569953 | ↓ |
| Melatonin | C13 H16 N2 O2 | 232.1209 | 6.567 | 233.12816 | 0.49291618 | 0.001827592 | 1.093854664 | ↓ |
| Trenbolone acetate | C20 H24 O3 | 312.17225 | 6.44 | 313.1796 | 1.605346801 | 0.001985604 | 1.177914007 | ↑ |
| Desoxycortone | C21 H30 O3 | 330.21851 | 8.48 | 331.22583 | 1.849941928 | 0.002111784 | 1.31013949 | ↑ |
| ACar 13:0 | C20 H40 N O4 | 357.28743 | 6.475 | 358.29495 | 7.403131833 | 0.00221111 | 1.163782241 | ↑ |
| Arachidonic acid methyl ester | C21 H34 O2 | 318.2562 | 7.178 | 319.26364 | 0.561638115 | 0.002259748 | 1.22997858 | ↓ |
| Wogonin | C16 H12 O5 | 284.06776 | 6.53 | 285.07483 | 8.764959359 | 0.002260037 | 1.1331119 | ↑ |
| N-Acetylanthranilic acid | C9 H9 N O3 | 197.06864 | 6.203 | 198.07568 | 1.914454764 | 0.00226709 | 1.052264165 | ↑ |
| Menaquinone | C31 H40 O2 | 444.30178 | 6.832 | 445.30841 | 15.63419688 | 0.002270788 | 1.062982637 | ↑ |
| allantoate | C4 H8 N4 O4 | 176.05459 | 1.375 | 177.0618 | 4.796259191 | 0.002421406 | 1.049742331 | ↑ |
| Nicotinamide 1-oxide | C6 H6 N2 O2 | 138.0428 | 2.251 | 139.05008 | 0.539374849 | 0.002598 | 1.023356404 | ↓ |
| Betulin | C30 H50 O2 | 442.37993 | 7.093 | 443.38715 | 3.959311244 | 0.002776619 | 1.043965533 | ↑ |
| Ergosta-5,7,9(11),22-Tetraen-3-beta-Ol | C28 H42 O | 394.32342 | 7.301 | 395.33044 | 0.13433975 | 0.002861008 | 1.191597724 | ↓ |
| Temazepam | C16 H13 Cl N2 O2 | 300.06574 | 1.195 | 301.07339 | 0.651681417 | 0.003151592 | 1.093384752 | ↓ |
| ACar 18:2 | C25 H46 N O4 | 423.33438 | 7.067 | 424.3414 | 4.628549078 | 0.003157603 | 1.015952192 | ↑ |
| 4-Butylresorcinol | C10 H14 O2 | 166.09929 | 8.845 | 167.10645 | 0.61275269 | 0.003536144 | 1.172649702 | ↓ |
| 11-Deoxy prostaglandin F1α | C20 H36 O4 | 362.24418 | 6.849 | 363.25113 | 0.582592317 | 0.00362312 | 1.046936338 | ↓ |
| N-Acetyl-S-allyl-L-cysteine | C8 H13 N O3 S | 203.06115 | 5.562 | 204.06839 | 0.259809305 | 0.003626661 | 1.089029634 | ↓ |
| Cytidine 5'-Monophosphate-N-Acetylneuraminic Acid | C20 H30 N4 Na O16 P | 636.13091 | 5.804 | 637.13818 | 3.589974531 | 0.003812237 | 1.083051767 | ↑ |
| LysoPE 18:0 | C23 H48 N O7 P | 481.31703 | 6.892 | 482.32394 | 0.612409011 | 0.003853211 | 1.032258045 | ↓ |
| acetyl phosphate | C2 H5 O5 P | 139.98744 | 1.266 | 140.99463 | 0.366050831 | 0.004028789 | 1.070588 | ↓ |
| Ecdysterone | C27 H44 O7 | 480.30767 | 6.882 | 481.31473 | 0.512313094 | 0.004113084 | 1.002881264 | ↓ |
| Trimethyllysine | C9 H21 N2 O2 | 189.16048 | 6.404 | 417.28412 | 1.54005872 | 0.004132152 | 1.413864235 | ↑ |
| ACar 16:2 | C23 H42 N O4 | 395.30328 | 6.644 | 396.31042 | 4.405518268 | 0.004459084 | 1.182221384 | ↑ |
| Milbemycin A3 oxime | C31 H43 N O7 | 541.29814 | 6.515 | 542.30518 | 1.669870329 | 0.004533063 | 1.035288004 | ↑ |
| Lysopc 18:2 | C26 H50 N O7 P | 519.33251 | 7.256 | 520.3399 | 0.50448208 | 0.004693847 | 1.087646092 | ↓ |
| Carbaprostacyclin | C21 H34 O4 | 332.23456 | 7.318 | 333.24219 | 0.652355367 | 0.004855468 | 1.018684348 | ↓ |
| Nicotinic acid | C6 H5 N O2 | 123.03206 | 1.459 | 124.03925 | 1.781335418 | 0.005354736 | 1.47629356 | ↑ |
| Nicotinuric acid | C8 H8 N2 O3 | 180.05342 | 2.137 | 181.0607 | 8.267048179 | 0.006623131 | 1.098523057 | ↑ |
| 6-Hydroxynicotinic acid | C6 H5 N O3 | 139.02689 | 3.541 | 140.03416 | 1.825887414 | 0.00782032 | 1.008857622 | ↑ |
| Medroxyprogesterone | C22 H32 O3 | 344.23451 | 6.496 | 345.24179 | 0.640343186 | 0.014281929 | 1.149786817 | ↓ |
| Phylloquinone | C31 H46 O2 | 450.34905 | 7.603 | 451.35641 | 0.132275423 | 0.017824195 | 1.083812608 | ↓ |
| Ciprostene | C22 H36 O4 | 346.25024 | 7.195 | 347.25748 | 3.08433454 | 0.019614771 | 1.157779606 | ↑ |

Abbreviations: RT, retention time; m/z, mass-to-charge ratio; FC, fold change; VIP, variable important in projection; ↑, up-regulated; ↓, down-regulated

Supplementary Table S4: The characteristics of 35 overlapping differential metabolites

| No. | Metabolites | ATB/HC | | | | LTBI/HC | | | | ATB/LTBI | | | |
| --- | --- | --- | --- | --- | --- | --- | --- | --- | --- | --- | --- | --- | --- |
| Fold change | p-value | VIP | Trend | Fold change | p-value | VIP | Trend | Fold change | p-value | VIP | Trend |
| 1 | Xanthosine | 0.098 | <0.01 | 1.922 | ↓ | 0.201 | <0.01 | 2.218 | ↓ | 0.486 | <0.05 | 1.070 | ↓ |
| 2 | Hypoxanthine | 0.271 | <0.01 | 1.974 | ↓ | 0.450 | <0.01 | 2.061 | ↓ | 0.602 | <0.01 | 1.136 | ↓ |
| 3 | LysoPC 12:1 | 0.120 | <0.01 | 1.937 | ↓ | 0.504 | <0.05 | 1.208 | ↓ | 0.237 | <0.01 | 1.803 | ↓ |
| 4 | (5-L-Glutamyl)-L-Amino Acid | 0.331 | <0.01 | 1.858 | ↓ | 0.553 | <0.01 | 1.764 | ↓ | 0.598 | <0.01 | 1.130 | ↓ |
| 5 | Deoxycholic Acid | 0.187 | <0.01 | 1.795 | ↓ | 0.580 | <0.01 | 1.404 | ↓ | 0.323 | <0.01 | 1.425 | ↓ |
| 6 | 3,4-Dimethylbenzoic acid | 10.097 | <0.01 | 2.078 | ↑ | 1.817 | <0.01 | 1.430 | ↑ | 5.556 | <0.01 | 1.818 | ↑ |
| 7 | N8-Acetylspermidine | 0.260 | <0.01 | 1.832 | ↓ | 0.566 | <0.01 | 1.491 | ↓ | 0.459 | <0.01 | 1.331 | ↓ |
| 8 | 13,14-dihydro-15-keto-tetranor Prostaglandin D2 | 0.058 | <0.01 | 1.748 | ↓ | 0.245 | <0.01 | 1.600 | ↓ | 0.236 | <0.01 | 1.088 | ↓ |
| 9 | Estrone | 0.043 | <0.01 | 1.520 | ↓ | 0.448 | <0.05 | 1.277 | ↓ | 0.095 | <0.01 | 1.140 | ↓ |
| 10 | 2-(2-carboxy-2-methylpropyl)-4,6-dimethylbenzoic acid | 0.090 | <0.01 | 1.592 | ↓ | 0.337 | <0.05 | 1.495 | ↓ | 0.268 | <0.01 | 1.247 | ↓ |
| 11 | Stercobilin | 0.099 | <0.01 | 1.630 | ↓ | 0.406 | <0.05 | 1.590 | ↓ | 0.243 | <0.01 | 1.291 | ↓ |
| 12 | 3-[(methoxycarbonyl)amino]-2,2,3-trimethylbutanoic acid | 0.108 | <0.01 | 1.785 | ↓ | 0.422 | <0.05 | 1.481 | ↓ | 0.255 | <0.01 | 1.509 | ↓ |
| 13 | 2'-Deoxyinosine | 0.133 | <0.01 | 1.655 | ↓ | 0.299 | <0.01 | 1.409 | ↓ | 0.443 | <0.01 | 1.128 | ↓ |
| 14 | Histamine | 0.143 | <0.01 | 1.602 | ↓ | 0.420 | <0.01 | 1.392 | ↓ | 0.339 | <0.05 | 1.054 | ↓ |
| 15 | Isophorone | 0.155 | <0.01 | 1.596 | ↓ | 0.395 | <0.05 | 1.542 | ↓ | 0.392 | <0.01 | 1.085 | ↓ |
| 16 | 10-Hydroxydecanoic acid | 0.166 | <0.01 | 1.590 | ↓ | 0.408 | <0.01 | 1.543 | ↓ | 0.406 | <0.05 | 1.005 | ↓ |
| 17 | Traumatic acid | 0.166 | <0.01 | 1.694 | ↓ | 0.436 | <0.01 | 1.795 | ↓ | 0.381 | <0.01 | 1.178 | ↓ |
| 18 | FAHFA (2:0/16:0) | 0.177 | <0.01 | 1.427 | ↓ | 0.499 | <0.05 | 1.540 | ↓ | 0.354 | <0.05 | 1.049 | ↓ |
| 19 | Dodecanedioic acid | 0.206 | <0.01 | 1.721 | ↓ | 0.482 | <0.05 | 1.168 | ↓ | 0.427 | <0.01 | 1.575 | ↓ |
| 20 | Guanosine | 0.219 | <0.01 | 1.793 | ↓ | 0.338 | <0.01 | 1.730 | ↓ | 0.649 | <0.01 | 1.007 | ↓ |
| 21 | Glycodeoxycholic Acid (hydrate) | 0.236 | <0.01 | 1.677 | ↓ | 0.536 | <0.05 | 1.251 | ↓ | 0.440 | <0.05 | 1.066 | ↓ |
| 22 | 2,3-Dinor-TXB2 | 0.237 | <0.01 | 1.712 | ↓ | 0.601 | <0.05 | 1.468 | ↓ | 0.394 | <0.01 | 1.086 | ↓ |
| 23 | (-)-Caryophyllene oxide | 0.273 | <0.01 | 1.653 | ↓ | 0.565 | <0.01 | 1.416 | ↓ | 0.483 | <0.05 | 1.231 | ↓ |
| 24 | dUMP | 0.277 | <0.01 | 1.686 | ↓ | 0.597 | <0.01 | 1.546 | ↓ | 0.464 | <0.01 | 1.054 | ↓ |
| 25 | 2-Hydroxy-1-(4-methoxyphenyl)propyl hexopyranoside | 0.299 | <0.01 | 1.448 | ↓ | 0.506 | <0.05 | 1.198 | ↓ | 0.590 | <0.01 | 1.169 | ↓ |
| 26 | Tetradecanedioic acid | 0.303 | <0.01 | 1.629 | ↓ | 0.559 | <0.05 | 1.157 | ↓ | 0.543 | <0.01 | 1.320 | ↓ |
| 27 | L-Histidinol | 0.327 | <0.01 | 1.477 | ↓ | 0.579 | <0.05 | 1.216 | ↓ | 0.565 | <0.01 | 1.178 | ↓ |
| 28 | Ala-Ile | 0.330 | <0.01 | 1.423 | ↓ | 0.662 | <0.05 | 1.269 | ↓ | 0.499 | <0.05 | 1.106 | ↓ |
| 29 | α-Aspartylphenylalanine | 0.339 | <0.01 | 1.639 | ↓ | 0.656 | <0.05 | 1.179 | ↓ | 0.517 | <0.01 | 1.222 | ↓ |
| 30 | D-Glucosamine 6-phosphate | 0.357 | <0.01 | 1.812 | ↓ | 0.561 | <0.01 | 1.675 | ↓ | 0.636 | <0.01 | 1.105 | ↓ |
| 31 | 2-Propylglutaric acid | 0.359 | <0.01 | 1.350 | ↓ | 0.610 | <0.05 | 1.136 | ↓ | 0.589 | <0.05 | 1.025 | ↓ |
| 32 | N-acetyl-L-ornithine | 0.365 | <0.01 | 1.856 | ↓ | 0.657 | <0.05 | 1.467 | ↓ | 0.555 | <0.01 | 1.340 | ↓ |
| 33 | Lithocholic Acid | 0.375 | <0.01 | 1.540 | ↓ | 0.663 | <0.05 | 1.144 | ↓ | 0.565 | <0.01 | 1.446 | ↓ |
| 34 | (+/-)-Equol | 3.806 | <0.01 | 1.271 | ↑ | 0.518 | <0.05 | 1.024 | ↓ | 7.346 | <0.01 | 2.362 | ↑ |
| 35 | D-Carnitine | 4.946 | <0.01 | 1.859 | ↑ | 2.229 | <0.01 | 1.357 | ↑ | 2.219 | <0.01 | 1.280 | ↑ |

Abbreviations: ATB, active tuberculosis; LTBI, latent tuberculosis infection; HC, healthy controls; VIP, variable important in projection; ↑, up-regulated; ↓, down-regulated
